# Supplementary material for: Formation and fragmentation of 2-hydroxyethylhydrazinium nitrate (HEHN) cluster ions: a combined electrospray ionization mass spectrometry, molecular dynamics and reaction potential surface study
Source: Royal Society of Chemistry journal article supplement (doi:10.1039/d3cp02610h), 2023-01-01
Supplement: d3cp02610h1.pdf [file d3cp02610h1.pdf]

## Supporting Information

### Formation and Fragmentation of 2-Hydroxyethylhydrazinium Nitrate (HEHN) Cluster Ions: A Combined Electro spray Ionization Mass Spectrometry, Molecular Dynamics and Reaction Potential Surface Study

Wenjing Zhou,<sup>a,b</sup> Jianbo Liu,<sup>a,b\*</sup> Steven D. Chambreau,<sup>c</sup> and Ghanshyam L. Vaghjiani<sup>d</sup>

<sup>a</sup> Department of Chemistry and Biochemistry, Queens College of the City University of New York,  
65-30 Kissena Blvd., Queens, New York 11367, USA;

<sup>b</sup> Ph.D. Program in Chemistry, the Graduate Center of the City University of New York,  
365 5th Ave., New York, New York 10016, USA;

<sup>c</sup> Jacobs Technology, Inc., Air Force Research Laboratory, Edwards Air Force Base, California 93524, USA;

<sup>d</sup> In-Space Propulsion Branch, Rocket Propulsion Division, Aerospace Systems Directorate, Air Force Research  
Laboratory, AFRL/RQRS, Edwards Air Force Base, California 93524, USA

## Table of Contents

|                                                                                                                                                                                                             |     |
|-------------------------------------------------------------------------------------------------------------------------------------------------------------------------------------------------------------|-----|
| Fig. S1 Relaxed PES scan for [(HEHN)HE + H] <sup>+</sup> .....                                                                                                                                              | S2  |
| Fig. S2 PES for formation and dissoication of [HOCH <sub>2</sub> CH <sub>2</sub> NHNH <sub>2</sub> CH <sub>2</sub> CH <sub>2</sub> NHNH <sub>2</sub> ] <sup>+</sup> ·H <sub>2</sub> O.....                  | S3  |
| Fig. S3 PES for formation and dissoication of [HOCH <sub>2</sub> CH <sub>2</sub> NH(NH <sub>2</sub> )CH <sub>2</sub> CH <sub>2</sub> NHNH <sub>2</sub> ] <sup>+</sup> ·H <sub>2</sub> O .....               | S4  |
| Fig. S4 PES for formation and dissoication of [CH <sub>2</sub> CHNHNH <sub>2</sub> ] <sup>+</sup> ·[NH <sub>2</sub> NH <sub>2</sub> CH <sub>2</sub> CH <sub>2</sub> OH] <sup>+</sup> ·H <sub>2</sub> O..... | S5  |
| Fig. S5 PES for another formation pathway of [HOCH <sub>2</sub> CH <sub>2</sub> NHNH <sub>2</sub> CH <sub>2</sub> CH <sub>2</sub> NHNH <sub>2</sub> ] <sup>+</sup> ·H <sub>2</sub> O .....                  | S6  |
| Fig. S6 Conformers of [(HEHN) <sub>2</sub> HE + H] <sup>+</sup> .....                                                                                                                                       | S7  |
| Fig. S7 PES for formation and dissoication of [HOCH <sub>2</sub> CH <sub>2</sub> NHNHCHCH <sub>3</sub> ] <sup>+</sup> ·H <sub>2</sub> O .....                                                               | S8  |
| Fig. S8 PES for formation and dissoication of [HOCH <sub>2</sub> CH <sub>2</sub> N(NH <sub>2</sub> )CHCH <sub>3</sub> ] <sup>+</sup> ·H <sub>2</sub> O .....                                                | S9  |
| Fig. S9 Conformers of [HE][HOCH <sub>2</sub> CH <sub>2</sub> NHNH <sub>2</sub> CH(OH)CH <sub>3</sub> ] <sup>+</sup> .....                                                                                   | S10 |
| Fig. S10 PES for formation and dissoication of [HE][HOCH <sub>2</sub> CH <sub>2</sub> NHNHCHCH <sub>3</sub> ] <sup>+</sup> ·H <sub>2</sub> O .....                                                          | S11 |
| Cartesian coordinates for structures in Rxns 2 – 10 .....                                                                                                                                                   | S12 |
| Cartesian coordinates for structures in Figs. S2 – S10 .....                                                                                                                                                | S27 |

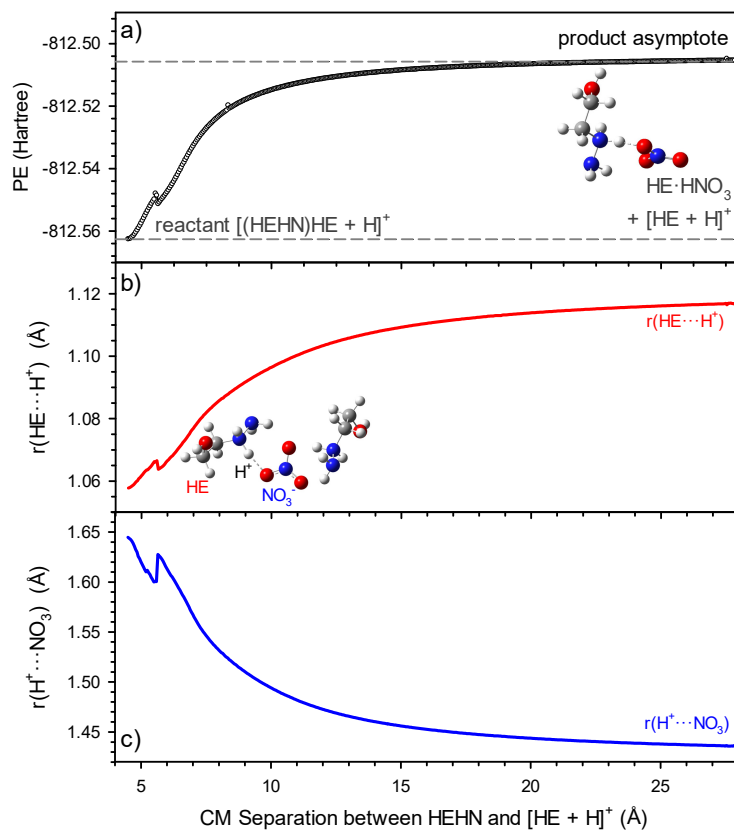

**Figure S1** a) A relaxed PES scan for  $[(HEHN)HE + H]^+$  along the center-of-mass distance between HEHN and  $[HE + H]^+$ , calculated at the  $\omega$ B97XD/6-31+G(d,p) level of theory; and b – c) the accompanying changes of H-bond lengths within the HEHN moiety.

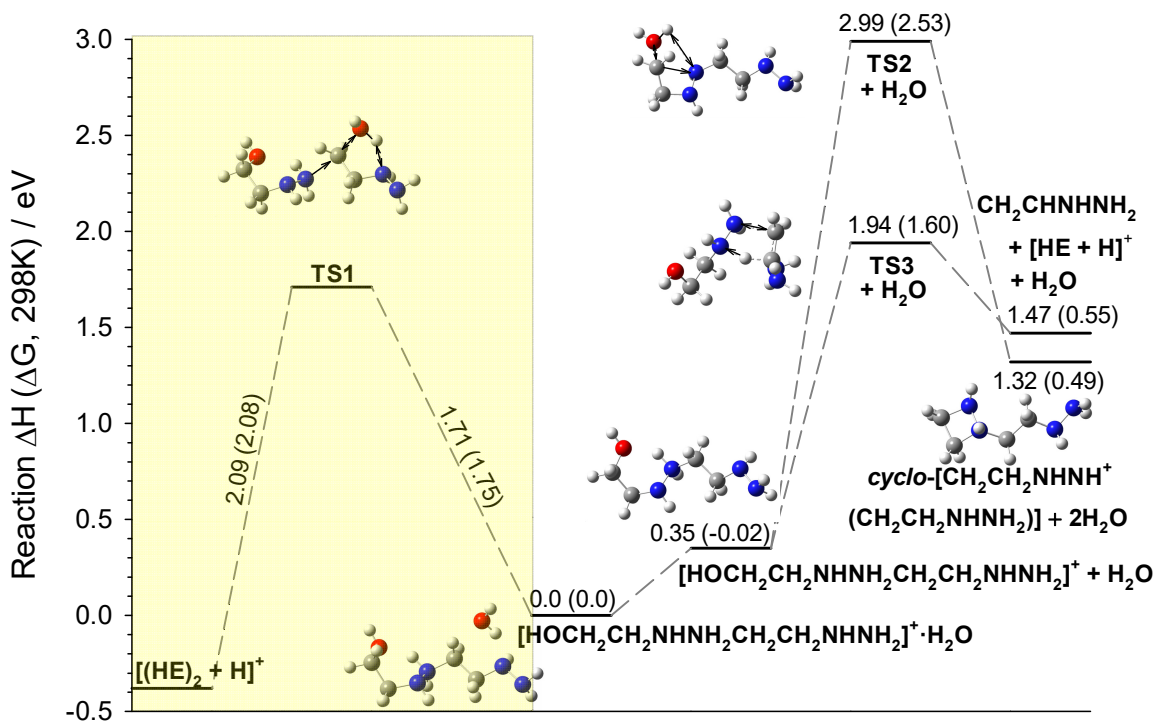

**Figure S2** PES for the formation and dissociation pathways of [HOCH<sub>2</sub>CH<sub>2</sub>NHNH<sub>2</sub>CH<sub>2</sub>CH<sub>2</sub>NHNH<sub>2</sub>]<sup>+</sup> · H<sub>2</sub>O, calculated at the ωB97XD/6-31+G(d,p) level of theory including thermal corrections at 298 K. The yellow-shaded portion shows a probable formation pathway of [HOCH<sub>2</sub>CH<sub>2</sub>NHNH<sub>2</sub>CH<sub>2</sub>CH<sub>2</sub>NHNH<sub>2</sub>]<sup>+</sup> · H<sub>2</sub>O from [(HE)<sub>2</sub> + H]<sup>+</sup> in the ion source. All reaction energies are referred to [HOCH<sub>2</sub>CH<sub>2</sub>NHNH<sub>2</sub>CH<sub>2</sub>CH<sub>2</sub>NHNH<sub>2</sub>]<sup>+</sup> · H<sub>2</sub>O as the zero energy point.

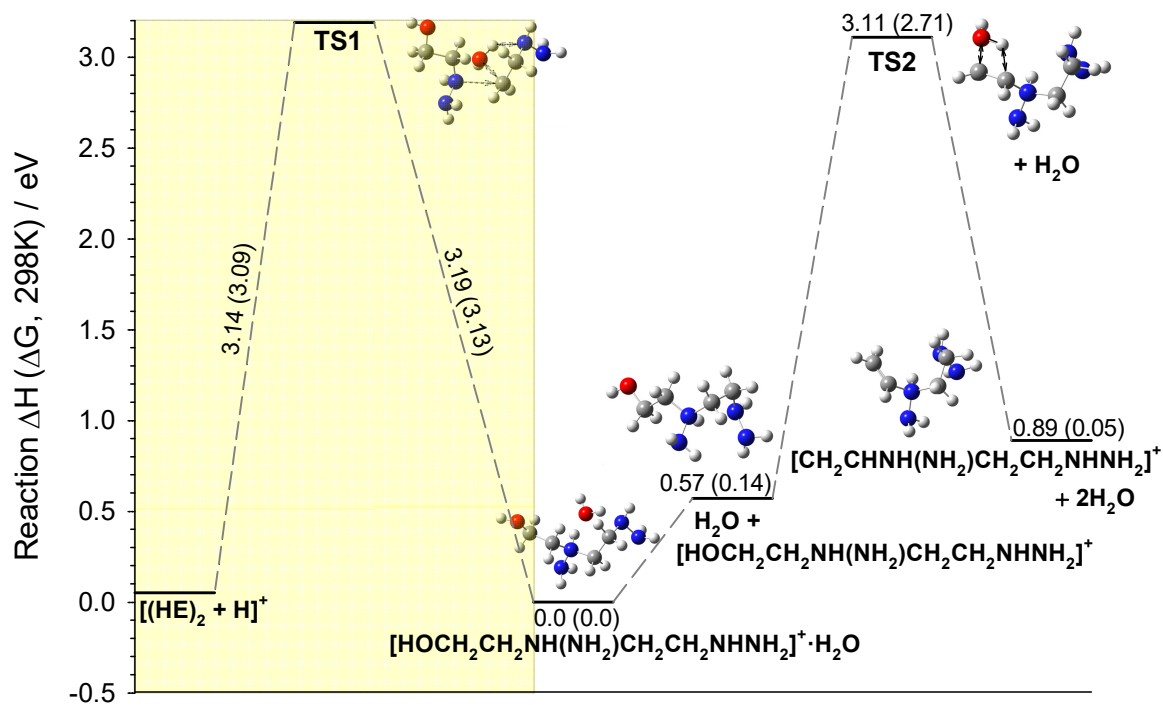

**Figure S3** PES for the formation and dissociation pathways of  $[HOCH_2CH_2NH(NH_2)CH_2CH_2NHNH_2]^+ \cdot H_2O$ , calculated at the  $\omega B97XD/6-31+G(d,p)$  level of theory including thermal corrections at 298 K. The yellow-shaded portion shows a probable formation pathway of  $[HOCH_2CH_2NH(NH_2)CH_2CH_2NHNH_2]^+ \cdot H_2O$  from  $[(HE)_2 + H]^+$  in the ion source. All reaction energies are referred to  $[HOCH_2CH_2NH(NH_2)CH_2CH_2NHNH_2]^+ \cdot H_2O$  as the zero energy point.

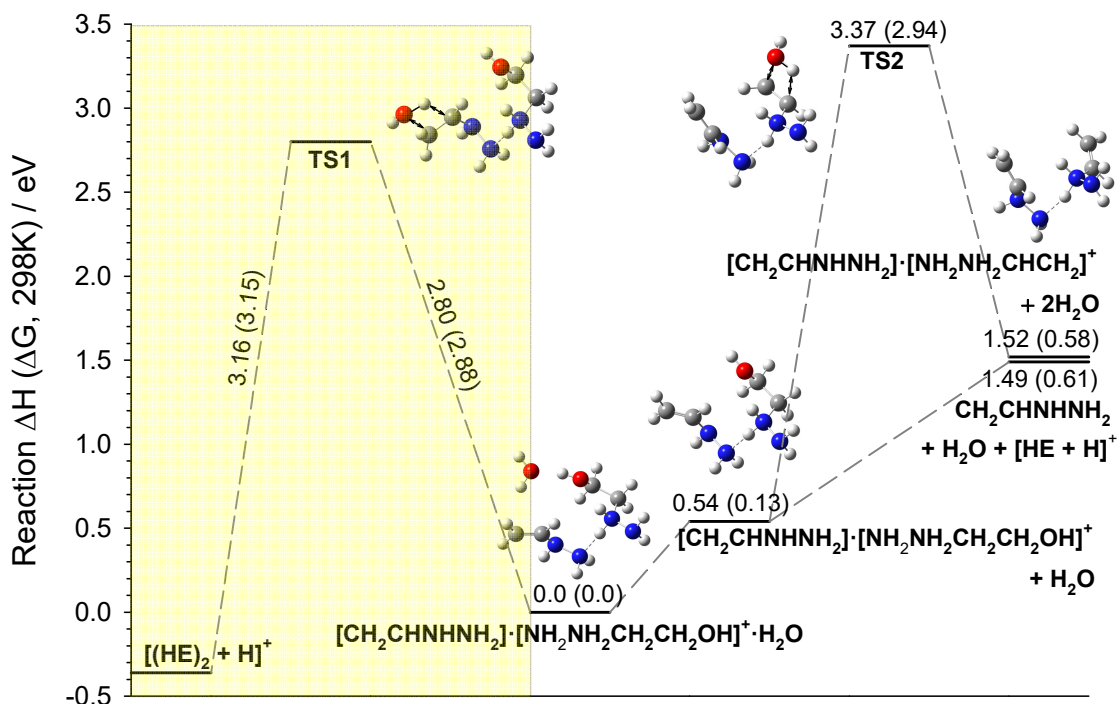

**Figure S4** PES for the formation and dissociation pathways of  $[CH_2CHNHNH_2] \cdot [NH_2NH_2CH_2CH_2OH]^+ \cdot H_2O$ , calculated at the  $\omega B97XD/6-31+G(d,p)$  level of theory including thermal corrections at 298 K. The yellow-shaded portion shows a probable formation pathway of  $[CH_2CHNHNH_2] \cdot [NH_2NH_2CH_2CH_2OH]^+ \cdot H_2O$  from  $[(HE)_2 + H]^+$  in the ion source. All reaction energies are referred to  $[CH_2CHNHNH_2] \cdot [NH_2NH_2CH_2CH_2OH]^+ \cdot H_2O$  as the zero energy point.

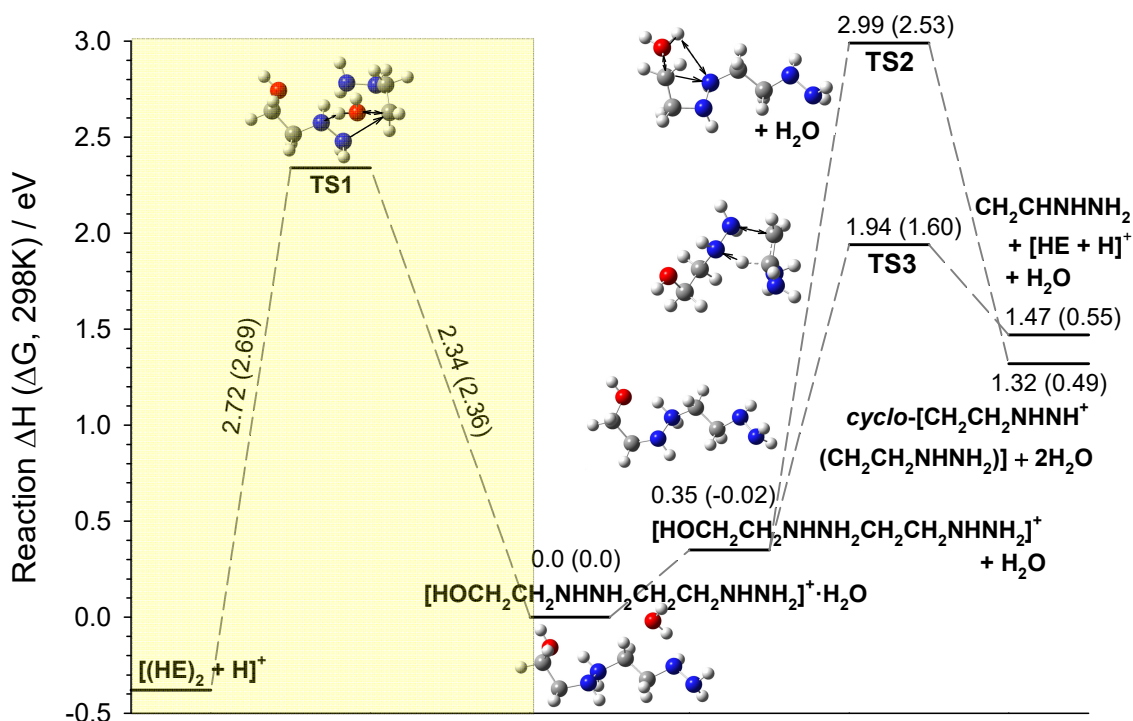

**Figure S5** PES for another formation pathway of  $[HOCH_2CH_2NHNH_2CH_2CH_2NHNH_2]^+ \cdot H_2O$  and its dissociation, calculated at the  $\omega B97XD/6-31+G(d,p)$  level of theory including thermal corrections at 298 K. The yellow-shaded portion shows a probable formation pathway of  $[HOCH_2CH_2NHNH_2CH_2CH_2NHNH_2]^+ \cdot H_2O$  from  $[(HE)_2 + H]^+$  in the ion source. All reaction energies are referred to  $[HOCH_2CH_2NHNH_2CH_2CH_2NHNH_2]^+ \cdot H_2O$  as the zero energy point.

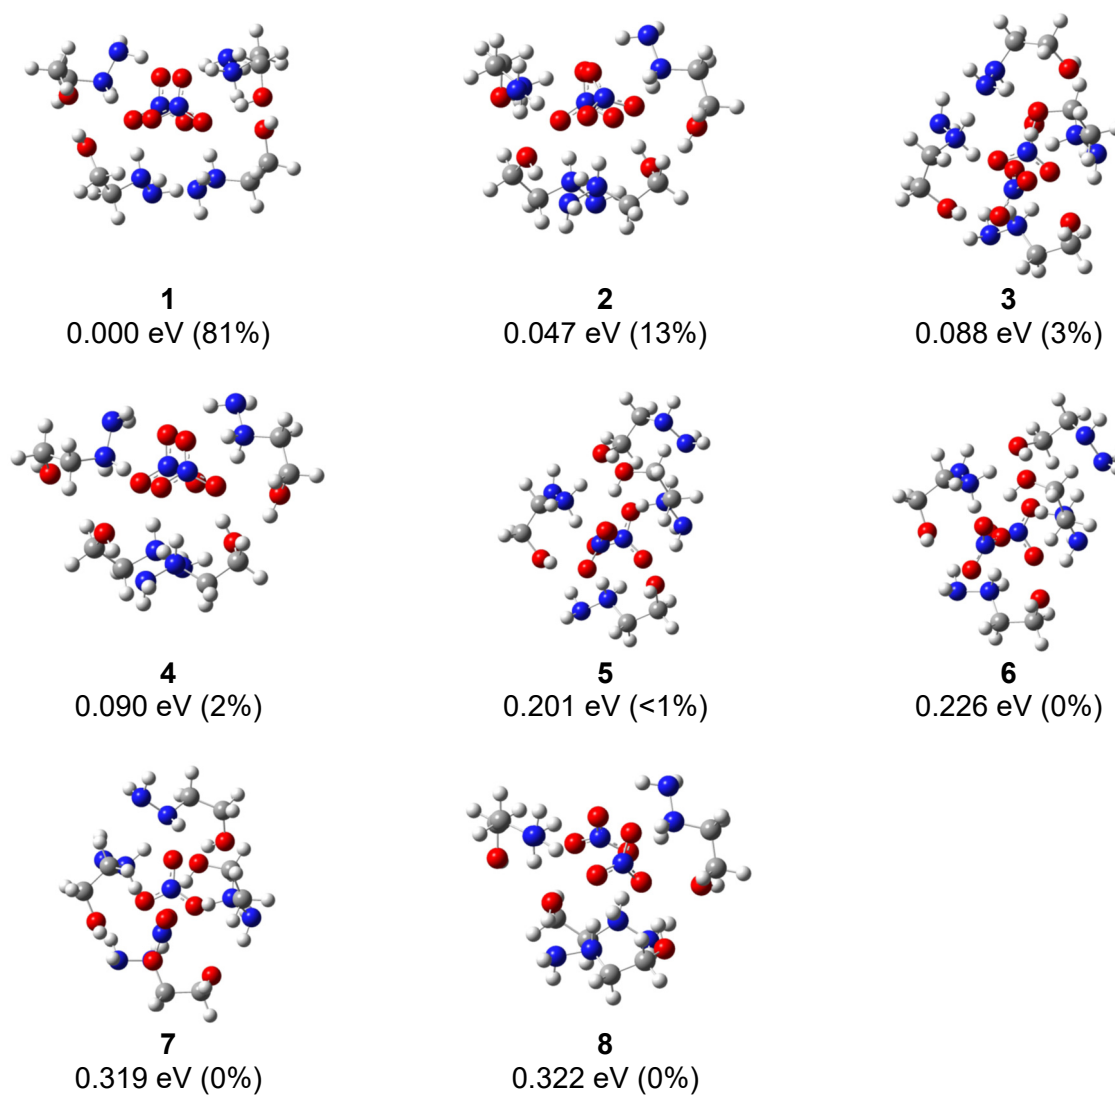

**Figure S6** Different conformers of  $[(\text{HEHN})_2(\text{HE})_2 + \text{H}]^+$  calculated at the  $\omega\text{B97XD}/6\text{-}31\text{+G(d,p)}$  level of theory, with their relative enthalpies and thermal populations (in parentheses) indicated.

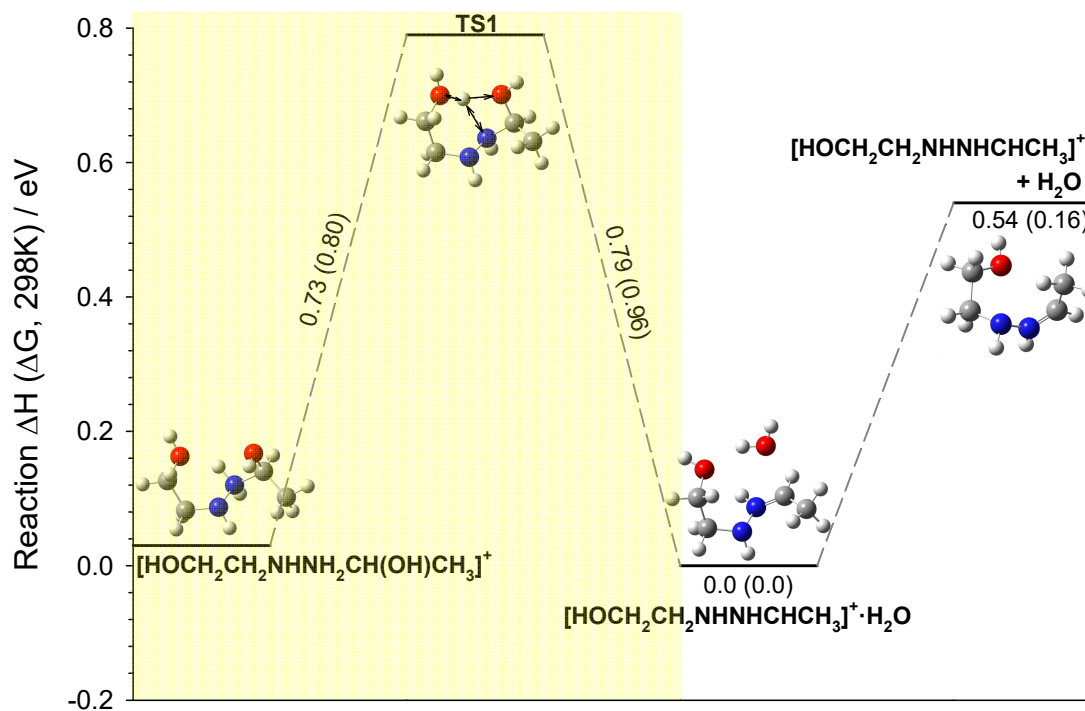

**Figure S7** PES for the formation and dissociation pathways of  $[\text{HOCH}_2\text{CH}_2\text{NHNHCHCH}_3]^+\cdot\text{H}_2\text{O}$ , calculated at the  $\omega\text{B97XD}/6\text{-}31\text{+G(d,p)}$  level of theory including thermal corrections at 298 K. The yellow-shaded portion shows a probable formation pathway of  $[\text{HOCH}_2\text{CH}_2\text{NHNHCHCH}_3]^+\cdot\text{H}_2\text{O}$  from  $[\text{HOCH}_2\text{CH}_2\text{NHNH}_2\text{CH}(\text{OH})\text{CH}_3]^+$  in the ion source. All reaction energies are referred to  $[\text{HOCH}_2\text{CH}_2\text{NHNHCHCH}_3]^+\cdot\text{H}_2\text{O}$  as the zero energy point.



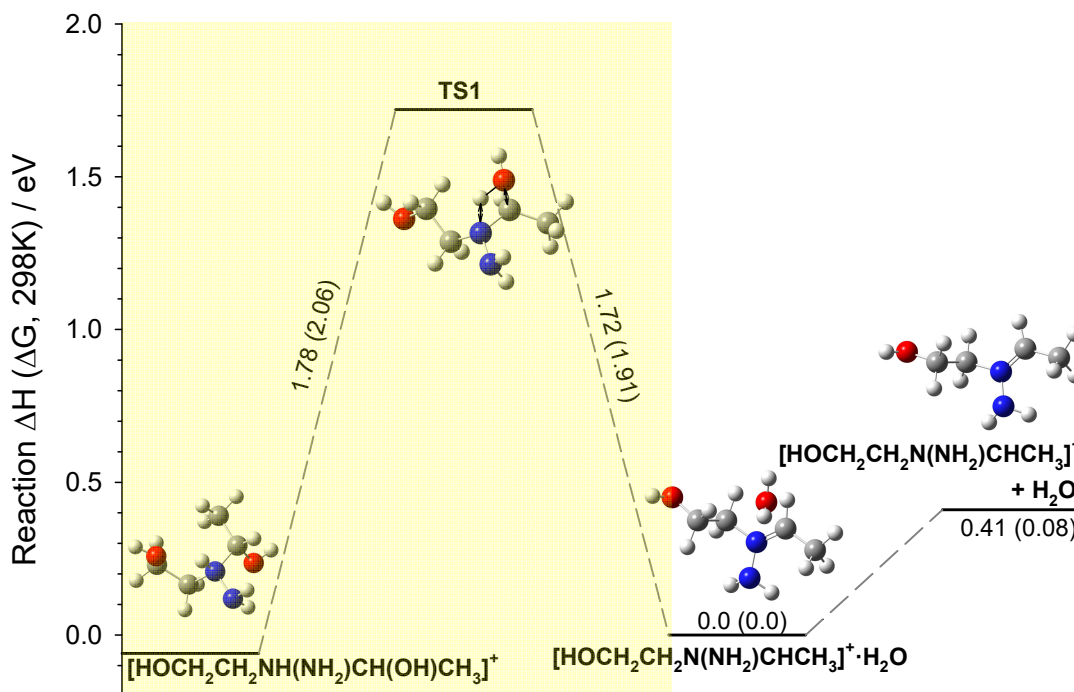

**Figure S8** PES for the formation and dissociation pathways of  $[\text{HOCH}_2\text{CH}_2\text{N}(\text{NH}_2)\text{CHCH}_3]^+\cdot\text{H}_2\text{O}$ , calculated at the  $\omega\text{B97XD}/6\text{-}31\text{+G(d,p)}$  level of theory including thermal corrections at 298 K. The yellow-shaded portion shows the probable formation of  $[\text{HOCH}_2\text{CH}_2\text{N}(\text{NH}_2)\text{CHCH}_3]^+\cdot\text{H}_2\text{O}$  from  $[\text{HOCH}_2\text{CH}_2\text{NH}(\text{NH}_2)\text{CH}(\text{OH})\text{CH}_3]^+$  in the ion source, before being selected by the first mass filter. All reaction energies are referred to  $[\text{HOCH}_2\text{CH}_2\text{N}(\text{NH}_2)\text{CHCH}_3]^+\cdot\text{H}_2\text{O}$  as the zero energy point.

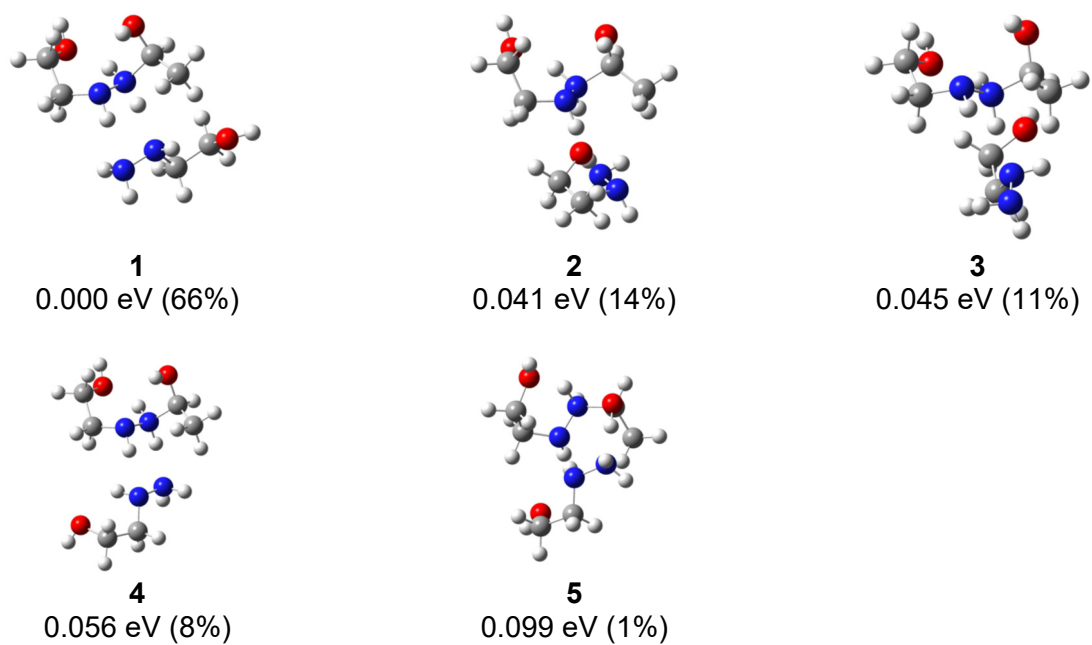

**Figure S9** Different conformers of  $[\text{HE}][\text{HOCH}_2\text{CH}_2\text{NHNH}_2\text{CH}(\text{OH})\text{CH}_3]^+$  calculated at the  $\omega\text{B97XD}/6\text{-}31+\text{G}(\text{d},\text{p})$  level of theory, with their relative enthalpies and thermal populations (in parentheses) indicated.

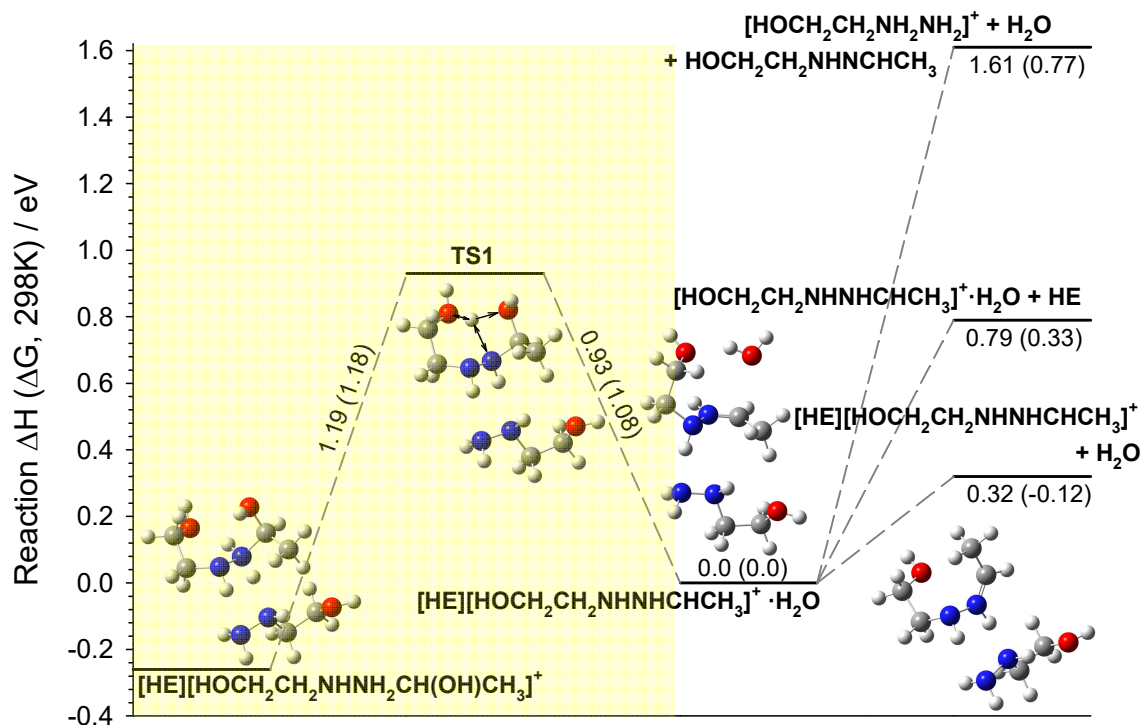

**Figure S10** PES for the formation and dissociation pathways of  $[\text{HE}][\text{HOCH}_2\text{CH}_2\text{NHNHCHCH}_3]^+\cdot\text{H}_2\text{O}$ , calculated at the  $\omega\text{B97XD}/6\text{-}31\text{+G(d,p)}$  level of theory including thermal corrections at 298 K. The yellow-shaded portion shows the formation of  $[\text{HE}][\text{HOCH}_2\text{CH}_2\text{NHNHCHCH}_3]^+\cdot\text{H}_2\text{O}$  from  $[\text{HE}][\text{HOCH}_2\text{CH}_2\text{NHNH}_2\text{CH(OH)CH}_3]^+$  in the ion source. All reaction energies are referred to  $[\text{HE}][\text{HOCH}_2\text{CH}_2\text{NHNHCHCH}_3]^+\cdot\text{H}_2\text{O}$  as the zero energy point.

**Cartesian coordinates for structures  
in Rxns 2, calculated at  $\omega$ B97XD/  
6-31+G(d,p)**

**[HOCH<sub>2</sub>CH<sub>2</sub>NH<sub>2</sub>NH<sub>2</sub>]<sup>+</sup>**

O1 1.353141 -0.806526 -0.426858  
C2 1.223684 0.234158 0.526470  
C3 0.084362 1.102238 0.008007  
N4 -0.990024 0.202679 -0.535109  
N5 -1.626194 -0.558328 0.504662  
H6 2.172580 -1.296881 -0.310192  
H7 2.124798 0.850458 0.599256  
H8 0.995926 -0.164393 1.522043  
H9 0.409620 1.716766 -0.834684  
H10 -0.363482 1.720944 0.785656  
H11 -0.542720 -0.392386 -1.248824  
H12 -1.706814 0.777787 -0.982576  
H13 -2.465640 -0.986219 0.120515  
H14 -0.984150 -1.302694 0.769940

**[CH<sub>3</sub>CH=NHNH<sub>2</sub>]<sup>+</sup>**

N1 1.815485 -0.185968 0.000015  
N2 0.527035 0.363930 -0.000005  
C3 -0.504084 -0.405376 0.000007  
C4 -1.890145 0.086465 -0.000007  
H5 -2.404664 -0.326675 -0.875469  
H6 -1.972570 1.174366 -0.000151  
H7 -2.404568 -0.326427 0.875640  
H8 -0.279229 -1.471166 0.000044  
H9 0.404570 1.378536 -0.000032  
H10 2.312133 0.119662 0.833024  
H11 2.312058 0.119433 -0.833125

**TS\_Rxn 2b.1**

N1 2.356289 0.337700 -0.207243  
N2 1.069390 0.270586 0.349501  
C3 0.214312 -0.604765 -0.310986  
C4 -1.078162 -0.918317 0.174552  
H5 -1.719868 -1.519360 -0.460214  
H6 -1.274057 -0.911398 1.242917  
O7 -2.268713 0.735686 -0.140238  
H8 -3.160221 0.820234 0.219461  
H9 0.287115 -1.764377 0.000054  
H10 0.372515 -0.618085 -1.389227  
H11 1.002861 0.304362 1.362121  
H12 -1.845122 1.600843 -0.086485  
H13 3.030826 -0.220322 0.306959  
H14 2.658997 1.303101 -0.250872

**[CH<sub>2</sub>=NHNH<sub>2</sub>]<sup>+</sup>**

N1 1.160184 -0.168000 0.091487  
N2 -0.075269 0.390765 -0.007371  
C3 -1.205036 -0.211947 -0.015148  
H4 -1.245151 -1.296104 -0.037387  
H5 -0.060604 1.409682 0.041890  
H6 1.176618 -1.159290 -0.121961  
H7 1.871041 0.369606 -0.391792  
H8 -2.106098 0.388434 0.011325

**CH<sub>3</sub>OH**

C1 0.662528 -0.020652 -0.000009  
H2 1.025131 -0.545268 -0.893777  
H3 1.025040 -0.545584 0.893621  
O4 -0.744790 0.122085 -0.000011  
H5 -1.148737 -0.748814 0.000050  
H6 1.081719 0.986894 0.000248

**TS\_Rxn 2c.1**

N1 2.273413 0.213380 -0.282903  
N2 1.104983 -0.525237 -0.039763  
C3 0.102639 0.194505 0.740469  
C4 -1.336889 0.601390 -0.229772  
H5 -1.601304 1.504121 0.326920  
H6 -1.176301 0.908543 -1.285145  
O7 -2.164089 -0.484811 -0.068618  
H8 -2.863939 -0.511108 -0.730771  
H9 0.483391 1.149762 1.095330  
H10 -0.421344 -0.414624 1.475348  
H11 -0.150278 0.132177 -0.516268  
H12 1.189731 -1.510860 0.190193  
H13 2.614796 0.015959 -1.216250  
H14 2.994690 0.012144 0.404064

**[CH<sub>2</sub>=C=NH<sub>2</sub>]<sup>+</sup>**

N1 1.215366 0.000055 0.000013  
C2 -0.044570 -0.000015 -0.000030  
C3 -1.330027 -0.000001 -0.000002  
H4 -1.874945 0.942584 0.001084  
H5 -1.875027 -0.942570 -0.000990  
H6 1.744982 0.000968 -0.872387  
H7 1.745015 -0.001273 0.872392

**[NH=NH<sub>2</sub>]<sup>+</sup>**

N1 0.537312 0.029246 0.000007  
N2 -0.672535 -0.156611 0.000011  
H3 -1.187243 0.739794 -0.000076  
H4 1.141362 -0.802986 -0.000068  
H5 0.992443 0.954744 0.000013

**CH<sub>3</sub>CH<sub>2</sub>OH**

C1 1.220739 -0.222087 -0.000020  
 C2 -0.085312 0.547006 -0.000011  
 H3 -0.141047 1.192236 0.888831  
 H4 -0.141102 1.192231 -0.888851  
 O5 -1.148535 -0.394911 0.000022  
 H6 -1.987207 0.072942 -0.000074  
 H7 2.068970 0.469262 -0.000039  
 H8 1.288080 -0.858313 0.886739  
 H9 1.288020 -0.858584 -0.886603

**TS\_Rxn 2e.1**

N1 -2.154637 -0.255452 -0.224448  
 N2 -1.132324 -0.113614 0.591813  
 C3 0.374979 1.101970 -0.255834  
 C4 1.601050 0.328351 0.110288  
 H5 2.425889 0.713068 -0.508184  
 H6 1.866980 0.484203 1.163516  
 O7 1.323625 -1.031695 -0.165221  
 H8 2.095506 -1.585735 -0.007533  
 H9 0.351793 2.143792 0.079152  
 H10 -0.014036 0.955415 -1.261277  
 H11 -0.687082 0.879591 0.742217  
 H12 -0.428422 -0.859959 0.544119  
 H13 -2.990988 0.273037 -0.026537  
 H14 -2.056085 -0.748319 -1.101984

**[N=NH<sub>2</sub>]<sup>+</sup>**

N1 0.000000 0.000000 -0.460036  
 N2 0.000000 0.000000 0.743267  
 H3 0.000000 0.895586 -0.991308  
 H4 0.000000 -0.895586 -0.991308

**CH<sub>3</sub>OH**

C1 0.662528 -0.020652 -0.000009  
 H2 1.025131 -0.545268 -0.893777  
 H3 1.025040 -0.545584 0.893621  
 O4 -0.744790 0.122085 -0.000011  
 H5 -1.148737 -0.748814 0.000050  
 H6 1.081719 0.986894 0.000248

**•CH<sub>3</sub>**

C1 0.000001 -0.000160 0.000425  
 H2 0.938463 -0.539219 -0.000850  
 H3 -0.936842 -0.542030 -0.000850  
 H4 -0.001626 1.082208 -0.000849

**[HOCH<sub>2</sub>CH<sub>2</sub>NHNH<sub>3</sub>]<sup>+</sup>**

H1 0.600796 -1.334643 0.017447  
 N2 1.449401 -0.731340 0.094710

N3 1.151569 0.637448 -0.279387  
 C4 -0.111105 1.078800 0.332515  
 C5 -1.359116 0.360200 -0.161649  
 H6 -2.228936 0.712238 0.401769  
 H7 -1.524725 0.557685 -1.227951  
 O8 -1.147440 -1.041158 0.048518  
 H9 -1.942602 -1.549278 -0.140968  
 H10 -0.185567 2.147692 0.119094  
 H11 -0.009280 0.976958 1.417982  
 H12 1.090926 0.651687 -1.295917  
 H13 1.772720 -0.728996 1.066230  
 H14 2.220714 -1.080836 -0.478293

**[CH<sub>3</sub>CH=NNH<sub>3</sub>]<sup>+</sup>**

N1 -1.769795 0.063318 -0.000003  
 N2 -0.428499 -0.511355 -0.000004  
 C3 0.506536 0.359701 0.000015  
 C4 1.922602 -0.078233 -0.000012  
 H5 2.426519 0.334489 -0.880038  
 H6 2.003380 -1.165097 -0.000121  
 H7 2.426449 0.334233 0.880177  
 H8 0.301339 1.437783 0.000021  
 H9 -2.262084 -0.292412 0.826207  
 H10 -2.262404 -0.293366 -0.825609  
 H11 -1.819967 1.091821 -0.000602

**TS\_Rxn 2b.2**

N1 -2.220751 0.325359 0.044854  
 N2 -0.837920 0.315126 -0.369670  
 C3 -0.157189 -0.698279 0.273464  
 C4 1.164085 -0.930539 -0.207329  
 H5 1.842872 -1.537786 0.381597  
 H6 1.331541 -0.830657 -1.274662  
 O7 2.035411 0.839560 0.194279  
 H8 2.839362 1.097558 -0.273356  
 H9 -0.189707 -1.813552 -0.205990  
 H10 -0.308348 -0.891606 1.347175  
 H11 1.336381 1.465885 -0.048919  
 H12 -2.781623 -0.442695 -0.345944  
 H13 -2.616424 1.192666 -0.322016  
 H14 -2.368022 0.333217 1.064785

**[CH<sub>2</sub>=NHNH<sub>2</sub>]<sup>+</sup>**

N1 1.160184 -0.168000 0.091487  
 N2 -0.075269 0.390765 -0.007371  
 C3 -1.205036 -0.211947 -0.015148  
 H4 -1.245151 -1.296104 -0.037387  
 H5 -0.060604 1.409682 0.041890  
 H6 1.176618 -1.159290 -0.121961  
 H7 1.871041 0.369606 -0.391792

H8 -2.106098 0.388434 0.011325

### CH<sub>3</sub>OH

C1 0.662528 -0.020652 -0.000009  
 H2 1.025131 -0.545268 -0.893777  
 H3 1.025040 -0.545584 0.893621  
 O4 -0.744790 0.122085 -0.000011  
 H5 -1.148737 -0.748814 0.000050  
 H6 1.081719 0.986894 0.000248

### TS\_Rxn 2c.2

H1 -0.047821 -0.651101 -0.445824  
 N2 1.308165 -0.974656 0.034614  
 N3 1.531962 0.409941 0.045684  
 C4 0.332155 1.031117 0.270304  
 C5 -1.102611 0.047070 -0.625608  
 H6 -1.347829 1.037839 -1.029465  
 H7 -1.191405 -0.587439 -1.532652  
 O8 -1.917621 -0.363020 0.427233  
 H9 -2.848712 -0.209556 0.236779  
 H10 0.299077 2.073122 -0.039147  
 H11 -0.149358 0.821448 1.225495  
 H12 2.065775 0.724230 -0.756608  
 H13 1.280909 -1.345445 0.985290  
 H14 2.022178 -1.475052 -0.491995

### [CH<sub>2</sub>=C=NH<sub>2</sub>]<sup>+</sup>

N1 1.215366 0.000055 0.000013  
 C2 -0.044570 -0.000015 -0.000030  
 C3 -1.330027 -0.000001 -0.000002  
 H4 -1.874945 0.942584 0.001084  
 H5 -1.875027 -0.942570 -0.000990  
 H6 1.744982 0.000968 -0.872387  
 H7 1.745015 -0.001273 0.872392

### [N=NH<sub>2</sub>]<sup>+</sup>

N1 0.000000 0.000000 -0.460036  
 N2 0.000000 0.000000 0.743267  
 H3 0.000000 0.895586 -0.991308  
 H4 0.000000 -0.895586 -0.991308

### CH<sub>3</sub>OH

C1 0.662528 -0.020652 -0.000009  
 H2 1.025131 -0.545268 -0.893777  
 H3 1.025040 -0.545584 0.893621  
 O4 -0.744790 0.122085 -0.000011  
 H5 -1.148737 -0.748814 0.000050  
 H6 1.081719 0.986894 0.000248

### •CH<sub>3</sub>

C1 0.000001 -0.000160 0.000425  
 H2 0.938463 -0.539219 -0.000850  
 H3 -0.936842 -0.542030 -0.000850  
 H4 -0.001626 1.082208 -0.000849

### Cartesian coordinates for structures in Rxns 3, calculated at ωB97XD/ 6-31+G(d,p)

### [HOCH<sub>2</sub>CH<sub>2</sub>NHNH<sub>2</sub>]·[HOCH<sub>2</sub>CH<sub>2</sub>NH<sub>2</sub>NH<sub>2</sub>]<sup>+</sup> (Structure I)

O1 -2.085492 -1.439869 -0.825220  
 C2 -2.746950 -0.188849 -0.809156  
 C3 -2.322517 0.497570 0.475819  
 N4 -0.842348 0.479701 0.568422  
 N5 -0.358036 1.214926 1.704249  
 H6 -2.424130 -1.993178 -1.534644  
 H7 -3.837279 -0.294666 -0.803188  
 H8 -2.462722 0.419097 -1.679388  
 H9 -2.713855 -0.033761 1.346803  
 H10 -2.645683 1.539156 0.511056  
 H11 -0.416173 0.961077 -0.260868  
 H12 -0.480002 -0.491371 0.564841  
 H13 -0.676331 0.729652 2.540380  
 H14 0.658704 1.116776 1.652618  
 N15 1.029514 1.810851 -1.045303  
 H16 1.351434 1.970206 -2.001242  
 H17 0.998046 2.714630 -0.579895  
 N18 1.921122 0.967849 -0.301135  
 H19 2.852323 1.376536 -0.264782  
 C20 1.993439 -0.372952 -0.894712  
 C21 2.241405 -1.432810 0.161945  
 H22 1.033767 -0.580668 -1.380274  
 H23 2.767037 -0.446213 -1.671270  
 H24 2.401136 -2.396464 -0.333871  
 H25 3.133202 -1.189893 0.752880  
 O26 1.093972 -1.493242 1.009789  
 H27 1.148661 -2.267080 1.577274

### HOCH<sub>2</sub>CH<sub>2</sub>NHNH<sub>2</sub> (HE)

N1 2.217126 -0.278438 -0.058113  
 H2 2.555479 0.648037 -0.315617  
 H3 2.270478 -0.880530 -0.871609  
 N4 0.873455 -0.241323 0.388914  
 H5 0.897688 -0.097285 1.393128  
 C6 0.020034 0.754971 -0.252602  
 C7 -1.423443 0.497918 0.161670  
 H8 0.309301 1.793594 -0.013848  
 H9 0.111177 0.617122 -1.335656

H10 -1.532872 0.659155 1.247005  
 H11 -2.091380 1.199932 -0.344256  
 O12 -1.830542 -0.804154 -0.193706  
 H13 -1.089154 -1.385805 0.020488

**[HOCH<sub>2</sub>CH<sub>2</sub>NHNH<sub>2</sub>]<sup>+</sup>**

O1 1.353141 -0.806526 -0.426858  
 C2 1.223684 0.234158 0.526470  
 C3 0.084362 1.102238 0.008007  
 N4 -0.990024 0.202679 -0.535109  
 N5 -1.626194 -0.558328 0.504662  
 H6 2.172580 -1.296881 -0.310192  
 H7 2.124798 0.850458 0.599256  
 H8 0.995926 -0.164393 1.522043  
 H9 0.409620 1.716766 -0.834684  
 H10 -0.363482 1.720944 0.785656  
 H11 -0.542720 -0.392386 -1.248824  
 H12 -1.706814 0.777787 -0.982576  
 H13 -2.465640 -0.986219 0.120515  
 H14 -0.984150 -1.302694 0.769940

**[HOCH<sub>2</sub>CH<sub>2</sub>NHNH<sub>2</sub>CH<sub>2</sub>CH<sub>2</sub>NHNH<sub>2</sub>]<sup>+</sup>·H<sub>2</sub>O  
 (frist probable structure II for *m/z* 153)**

O1 -1.982147 2.389763 -0.555460  
 C2 -0.534115 0.132705 0.738569  
 C3 -1.599759 -0.787719 0.148946  
 H4 -2.438283 3.114396 -0.989367  
 H5 -0.707053 0.320956 1.802770  
 H6 -1.518140 -1.799403 0.588564  
 N7 0.822449 -0.488639 0.653189  
 H8 1.533487 0.157260 1.060957  
 H9 0.860518 -1.360670 1.197838  
 N10 1.266626 -0.672672 -0.705608  
 H11 0.739896 -1.446476 -1.100939  
 C12 2.713060 -0.924185 -0.761944  
 C13 3.494546 0.342578 -0.462754  
 H14 3.027593 -1.731804 -0.083475  
 H15 2.924501 -1.241785 -1.785251  
 H16 4.566629 0.141119 -0.548314  
 H17 3.208829 1.131141 -1.166108  
 O18 3.163777 0.726560 0.878421  
 H19 3.607137 1.544553 1.123917  
 H20 -1.472889 -0.877334 -0.932830  
 N21 -2.915731 -0.196908 0.350222  
 H22 -3.134986 -0.134850 1.343192  
 N23 -3.894186 -0.940298 -0.361408  
 H24 -4.288043 -1.694353 0.195175  
 H25 -4.637694 -0.317130 -0.651434  
 H26 -2.630791 1.689171 -0.374104  
 H27 -0.490253 1.083968 0.204062

**[HOCH<sub>2</sub>CH<sub>2</sub>NHNH<sub>2</sub>CH<sub>2</sub>CH<sub>2</sub>NHNH<sub>2</sub>]<sup>+</sup>**

C1 0.793598 -0.830484 0.009554  
 C2 1.932164 0.140869 0.307959  
 H3 0.964287 -1.804487 0.477258  
 H4 1.925259 0.419103 1.380168  
 N5 -0.511630 -0.339223 0.551165  
 H6 -1.272222 -1.022325 0.345386  
 H7 -0.460764 -0.245174 1.574660  
 N8 -0.955121 0.874261 -0.088801  
 H9 -0.351104 1.627170 0.229644  
 C10 -2.364773 1.151578 0.221981  
 C11 -3.281681 0.200764 -0.525890  
 H12 -2.571576 1.108346 1.301999  
 H13 -2.554355 2.172539 -0.116444  
 H14 -4.324318 0.438037 -0.293630  
 H15 -3.114184 0.290092 -1.603996  
 O16 -2.959446 -1.122831 -0.079504  
 H17 -3.518179 -1.779651 -0.506299  
 H18 1.818615 1.057110 -0.276597  
 N19 3.167325 -0.466094 -0.138855  
 H20 3.488753 -1.185206 0.503745  
 N21 4.159995 0.505537 -0.407948  
 H22 4.767750 0.678228 0.388172  
 H23 4.716714 0.194072 -1.194416  
 H24 0.661068 -0.962936 -1.064167

***cyclo*-[CH<sub>2</sub>CH<sub>2</sub>NHNH<sup>+</sup>(CH<sub>2</sub>CH<sub>2</sub>NHNH<sub>2</sub>)]**

C1 -0.169079 0.742094 -0.152305  
 C2 -1.318026 -0.103038 0.392871  
 H3 -0.255421 1.796089 0.131355  
 H4 -1.276137 -0.142708 1.498189  
 N5 1.133634 0.266051 0.389233  
 H6 1.117644 0.322996 1.414531  
 N7 1.550982 -1.045456 -0.089451  
 H8 1.356462 -1.777129 0.591313  
 C9 2.959925 -0.590921 -0.218882  
 C10 2.428421 0.847742 -0.148511  
 H11 3.598719 -0.857732 0.627827  
 H12 3.420511 -0.901849 -1.154916  
 H13 2.894295 1.552971 0.537091  
 H14 2.233287 1.306748 -1.116984  
 H15 -1.230176 -1.125335 0.016498  
 N16 -2.557010 0.426190 -0.134757  
 H17 -2.868010 1.246472 0.378074  
 N18 -3.557409 -0.569676 -0.230321  
 H19 -4.159942 -0.601216 0.587509  
 H20 -4.118145 -0.390869 -1.054364  
 H21 -0.111913 0.656541 -1.238093

**TS\_Rxn 3e.1**

C1 -0.601876 0.567434 -0.308324  
 C2 -1.859838 -0.020643 0.339977  
 H3 -0.592883 1.659193 -0.211690  
 H4 -1.826245 0.142518 1.434006  
 N5 0.642661 0.084868 0.285738  
 H6 2.401363 2.313511 0.037822  
 H7 0.763818 0.413652 1.246198  
 N8 0.817957 -1.325001 0.169250  
 H9 0.373464 -1.845821 0.921660  
 C10 2.251043 -1.463845 0.125265  
 C11 2.676632 -0.424289 -0.811187  
 H12 2.765667 -1.328267 1.091101  
 H13 2.599191 -2.434150 -0.277699  
 H14 3.722751 -0.155372 -0.888985  
 H15 2.024698 -0.147624 -1.632812  
 O16 3.064308 1.662875 0.293271  
 H17 3.898886 2.141305 0.369166  
 H18 -1.897386 -1.098881 0.165282  
 N19 -3.032482 0.538747 -0.301268  
 H20 -3.164516 1.513585 -0.043101  
 N21 -4.184587 -0.242520 -0.039668  
 H22 -4.690771 0.065624 0.786443  
 H23 -4.797631 -0.201596 -0.844377  
 H24 -0.595483 0.314729 -1.371923

**[HE + H]<sup>+</sup>**

O1 1.353141 -0.806526 -0.426858  
 C2 1.223684 0.234158 0.526470  
 C3 0.084362 1.102238 0.008007  
 N4 -0.990024 0.202679 -0.535109  
 N5 -1.626194 -0.558328 0.504662  
 H6 2.172580 -1.296881 -0.310192  
 H7 2.124798 0.850458 0.599256  
 H8 0.995926 -0.164393 1.522043  
 H9 0.409620 1.716766 -0.834684  
 H10 -0.363482 1.720944 0.785656  
 H11 -0.542720 -0.392386 -1.248824  
 H12 -1.706814 0.777787 -0.982576  
 H13 -2.465640 -0.986219 0.120515  
 H14 -0.984150 -1.302694 0.769940

**CH<sub>2</sub>CHNHNH<sub>2</sub>**

N1 -1.755825 -0.052331 0.174844  
 H2 -1.671786 -0.632683 1.005352  
 H3 -2.183407 -0.584515 -0.573705  
 N4 -0.507208 0.441293 -0.250666  
 H5 -0.379821 1.397234 0.051986  
 C6 0.617627 -0.368522 -0.132054  
 C7 1.863769 0.048432 0.122950

H8 0.409324 -1.419744 -0.323961  
 H9 2.091764 1.092294 0.319134  
 H10 2.686776 -0.654785 0.106578

**TS\_Rxn 3f.1**

C1 1.973957 -1.258387 -0.555326  
 C2 1.532430 -0.057588 -1.124933  
 N3 1.815696 1.222175 -0.521369  
 N4 2.080327 1.127756 0.870206  
 H5 2.640776 -1.301029 0.296382  
 H6 1.831954 -2.183661 -1.103483  
 H7 1.446713 -0.008713 -2.210285  
 H8 2.533175 1.730204 -1.029738  
 H9 3.071596 0.992922 1.066413  
 H10 1.805352 2.005593 1.298150  
 N11 0.276552 -1.501547 0.821148  
 H12 0.652917 -0.969330 1.603202  
 H13 -0.041733 -2.424403 1.099744  
 N14 -0.669119 -0.754253 0.134448  
 H15 0.310290 -0.263690 -0.823803  
 C16 -1.362235 0.325420 0.862856  
 C17 -2.354454 0.953470 -0.098796  
 H18 -1.883686 -0.089319 1.732140  
 H19 -0.616797 1.053922 1.187478  
 H20 -2.963233 1.683787 0.445099  
 H21 -1.822173 1.467666 -0.909712  
 O22 -3.131988 -0.122050 -0.595555  
 H23 -3.818978 0.196399 -1.187689  
 H24 -1.352652 -1.350353 -0.333299

**[CH<sub>2</sub>CHNHNH<sub>2</sub>][NH<sub>2</sub>NH<sub>2</sub>CH<sub>2</sub>CH<sub>2</sub>OH]<sup>+</sup>·H<sub>2</sub>O  
(second probable structure II for m/z 153)**

C1 2.966649 -1.094683 -0.735792  
 C2 1.672837 -1.052843 -0.404374  
 N3 1.123311 -1.593985 0.765411  
 N4 -0.178649 -2.149381 0.593966  
 H5 3.700420 -1.639271 -0.148727  
 H6 3.310154 -0.598624 -1.635817  
 H7 3.025422 2.860862 -0.064519  
 H8 1.758100 -2.232297 1.236701  
 H9 -0.143806 -3.032672 0.080778  
 H10 -0.543014 -2.350470 1.521573  
 N11 -3.095399 -0.753469 -0.946675  
 H12 -3.596747 -1.198779 -0.183259  
 H13 -3.687586 -0.030055 -1.346057  
 N14 -1.916116 -0.147434 -0.421224  
 H15 -1.275352 -0.929817 -0.089413  
 C16 -2.052723 0.883883 0.651110  
 C17 -0.676995 1.510297 0.836666  
 H18 -2.778601 1.621985 0.300853



H19 -2.424300 0.402456 1.558088  
 H20 -0.769954 2.396447 1.474057  
 H21 0.006398 0.800995 1.323996  
 O22 -0.235853 1.829078 -0.464910  
 H23 0.709330 2.079677 -0.423295  
 H24 -1.408565 0.314640 -1.187649  
 O25 2.396719 2.141524 0.040953  
 H26 2.883824 1.311413 -0.034526  
 H27 0.956708 -0.511353 -1.017134

**[CH<sub>2</sub>CHNHNH<sub>2</sub>][NH<sub>2</sub>NH<sub>2</sub>CH<sub>2</sub>CH<sub>2</sub>OH]<sup>+</sup>**

C1 -3.336882 -0.549841 -0.645794  
 C2 -2.111831 -0.110760 -0.361606  
 N3 -1.782321 0.689666 0.752298  
 N4 -0.858678 1.735221 0.433553  
 H5 -4.208323 -0.256388 -0.067490  
 H6 -3.490893 -1.242478 -1.463753  
 H7 -2.615321 1.052490 1.209148  
 H8 -1.279218 2.434153 -0.183574  
 H9 -0.621557 2.202517 1.305172  
 N10 2.370343 1.511453 -0.872163  
 H11 2.572430 2.134341 -0.095177  
 H12 3.238801 1.084864 -1.184274  
 N13 1.483696 0.490472 -0.416650  
 H14 0.567257 0.982455 -0.137263  
 C15 1.947699 -0.405252 0.685524  
 C16 0.940288 -1.535053 0.832694  
 H17 2.929662 -0.792333 0.402134  
 H18 2.034809 0.185860 1.599638  
 H19 1.346621 -2.282425 1.522048  
 H20 -0.009275 -1.156362 1.233132  
 O21 0.777201 -2.048765 -0.479145  
 H22 0.191856 -2.811836 -0.479506  
 H23 1.252088 -0.108982 -1.216752  
 H24 -1.253469 -0.418001 -0.954496

**[CH<sub>2</sub>CHNHNH<sub>2</sub>][NH<sub>2</sub>NH<sub>2</sub>CHCH<sub>2</sub>]<sup>+</sup>**

C1 -2.306704 1.642000 0.308788  
 C2 -1.961539 0.355007 0.348262  
 N3 -1.759486 -0.423018 -0.822987  
 N4 -1.026757 -1.621340 -0.570145  
 H5 -2.443217 2.166806 -0.631981  
 H6 -2.511595 2.175905 1.228987  
 H7 -2.620006 -0.593915 -1.334003  
 H8 -1.575234 -2.314062 -0.056094  
 H9 -0.777861 -2.027174 -1.468586  
 N10 1.259414 -0.404116 1.786098  
 H11 1.592408 -1.361263 1.866380  
 H12 1.984036 0.222834 2.127962  
 N13 1.032085 -0.121825 0.397432

H14 0.318751 -0.864054 0.048679  
 C15 2.207369 -0.053650 -0.465420  
 C16 2.517453 1.048806 -1.130152  
 H17 2.770049 -0.980276 -0.498561  
 H18 3.390117 1.066077 -1.772385  
 H19 1.923353 1.956776 -1.068472  
 H20 0.496724 0.754322 0.357167  
 H21 -1.823794 -0.162853 1.299247

**TS\_Rxn 3e.2**

C1 2.084884 1.600421 -1.232860  
 C2 2.106377 0.416067 -0.620687  
 N3 1.944223 0.255247 0.778091  
 N4 1.725452 -1.101095 1.157204  
 H5 1.939786 2.527946 -0.686215  
 H6 2.269380 1.665268 -2.298204  
 H7 2.687811 0.699685 1.308115  
 H8 2.578887 -1.659030 1.104324  
 H9 1.410300 -1.107697 2.122584  
 N10 -1.085115 -2.194366 -1.116851  
 H11 -1.192583 -2.952710 -0.447932  
 H12 -2.012278 -1.975074 -1.476980  
 N13 -0.644562 -1.039780 -0.387950  
 H14 0.224872 -1.317359 0.140603  
 C15 -1.650831 -0.389471 0.487694  
 C16 -1.376537 1.013568 0.798540  
 H17 -2.795918 0.582432 -0.208643  
 H18 -1.883658 -1.043607 1.324771  
 H19 -1.592744 1.334488 1.815605  
 H20 -0.481051 1.486789 0.397728  
 O21 -2.556674 1.644055 -0.099092  
 H22 -3.212009 2.199114 0.358513  
 H23 -0.311844 -0.370563 -1.087804  
 H24 2.261087 -0.505670 -1.183301

**[HE + H]<sup>+</sup>**

O1 1.353141 -0.806526 -0.426858  
 C2 1.223684 0.234158 0.526470  
 C3 0.084362 1.102238 0.008007  
 N4 -0.990024 0.202679 -0.535109  
 N5 -1.626194 -0.558328 0.504662  
 H6 2.172580 -1.296881 -0.310192  
 H7 2.124798 0.850458 0.599256  
 H8 0.995926 -0.164393 1.522043  
 H9 0.409620 1.716766 -0.834684  
 H10 -0.363482 1.720944 0.785656  
 H11 -0.542720 -0.392386 -1.248824  
 H12 -1.706814 0.777787 -0.982576  
 H13 -2.465640 -0.986219 0.120515  
 H14 -0.984150 -1.302694 0.769940

**CH<sub>2</sub>CHNHNH<sub>2</sub>**

N1 -1.755825 -0.052331 0.174844  
 H2 -1.671786 -0.632683 1.005352  
 H3 -2.183407 -0.584515 -0.573705  
 N4 -0.507208 0.441293 -0.250666  
 H5 -0.379821 1.397234 0.051986  
 C6 0.617627 -0.368522 -0.132054  
 C7 1.863769 0.048432 0.122950  
 H8 0.409324 -1.419744 -0.323961  
 H9 2.091764 1.092294 0.319134  
 H10 2.686776 -0.654785 0.106578

**Cartesian coordinates for structures  
 in Rxns 4, calculated at  $\omega$ B97XD/  
 6-31+G(d,p)**

**[(HE)<sub>3</sub> + H]<sup>+</sup>**

O1 -0.294204 -0.059411 1.922145  
 C2 -0.506412 1.313952 2.140066  
 C3 -0.234573 2.144738 0.890482  
 N4 -1.013511 1.627343 -0.261022  
 N5 -0.801421 2.450294 -1.421461  
 H6 0.628080 -0.338031 2.109085  
 H7 0.115394 1.706322 2.953094  
 H8 -1.552246 1.435728 2.443721  
 H9 0.813134 2.097513 0.590336  
 H10 -0.514870 3.190896 1.032535  
 H11 -2.014295 1.605135 -0.033864  
 H12 -0.796326 0.609327 -0.459387  
 H13 -1.493423 2.177683 -2.114848  
 H14 0.122824 2.181896 -1.771282  
 N15 -0.079643 -1.424012 -2.100018  
 H16 -0.657747 -1.128980 -2.881978  
 H17 0.074234 -2.428203 -2.197016  
 N18 -0.764695 -1.111435 -0.888495  
 H19 -0.090135 -1.272116 -0.137801  
 C20 -2.005256 -1.868594 -0.681495  
 C21 -2.818767 -1.329223 0.482533  
 H22 -2.601013 -1.783404 -1.596334  
 H23 -1.805241 -2.937363 -0.509132  
 H24 -3.679024 -1.989656 0.629158  
 H25 -2.219114 -1.310771 1.398171  
 O26 -3.264773 0.001029 0.180304  
 H27 -4.131019 0.140003 0.571545  
 N28 2.093131 -1.472598 1.867948  
 H29 2.977860 -1.542229 2.374064  
 H30 1.606443 -2.356778 1.982977  
 N31 2.293043 -1.249699 0.465792  
 H32 2.895667 -1.975491 0.078592  
 C33 2.946095 0.046021 0.273177

C34 2.897136 0.497311 -1.180609  
 H35 2.412257 0.769856 0.894708  
 H36 3.994046 0.038220 0.616173  
 H37 3.454483 1.433235 -1.275003  
 H38 3.389655 -0.239975 -1.829404  
 O39 1.577661 0.741415 -1.624137  
 H40 1.163250 -0.111565 -1.878737

**[(HE)<sub>2</sub> + H]<sup>+</sup>**

O1 -2.085492 -1.439869 -0.825220  
 C2 -2.746950 -0.188849 -0.809156  
 C3 -2.322517 0.497570 0.475819  
 N4 -0.842348 0.479701 0.568422  
 N5 -0.358036 1.214926 1.704249  
 H6 -2.424130 -1.993178 -1.534644  
 H7 -3.837279 -0.294666 -0.803188  
 H8 -2.462722 0.419097 -1.679388  
 H9 -2.713855 -0.033761 1.346803  
 H10 -2.645683 1.539156 0.511056  
 H11 -0.416173 0.961077 -0.260868  
 H12 -0.480002 -0.491371 0.564841  
 H13 -0.676331 0.729652 2.540380  
 H14 0.658704 1.116776 1.652618  
 N15 1.029514 1.810851 -1.045303  
 H16 1.351434 1.970206 -2.001242  
 H17 0.998046 2.714630 -0.579895  
 N18 1.921122 0.967849 -0.301135  
 H19 2.852323 1.376536 -0.264782  
 C20 1.993439 -0.372952 -0.894712  
 C21 2.241405 -1.432810 0.161945  
 H22 1.033767 -0.580668 -1.380274  
 H23 2.767037 -0.446213 -1.671270  
 H24 2.401136 -2.396464 -0.333871  
 H25 3.133202 -1.189893 0.752880  
 O26 1.093972 -1.493242 1.009789  
 H27 1.148661 -2.267080 1.577274

**HE**

N1 2.217126 -0.278438 -0.058113  
 H2 2.555479 0.648037 -0.315617  
 H3 2.270478 -0.880530 -0.871609  
 N4 0.873455 -0.241323 0.388914  
 H5 0.897688 -0.097285 1.393128  
 C6 0.020034 0.754971 -0.252602  
 C7 -1.423443 0.497918 0.161670  
 H8 0.309301 1.793594 -0.013848  
 H9 0.111177 0.617122 -1.335656  
 H10 -1.532872 0.659155 1.247005  
 H11 -2.091380 1.199932 -0.344256  
 O12 -1.830542 -0.804154 -0.193706

H13 -1.089154 -1.385805 0.020488

**[HE + H]<sup>+</sup>**

O1 1.353141 -0.806526 -0.426858  
 C2 1.223684 0.234158 0.526470  
 C3 0.084362 1.102238 0.008007  
 N4 -0.990024 0.202679 -0.535109  
 N5 -1.626194 -0.558328 0.504662  
 H6 2.172580 -1.296881 -0.310192  
 H7 2.124798 0.850458 0.599256  
 H8 0.995926 -0.164393 1.522043  
 H9 0.409620 1.716766 -0.834684  
 H10 -0.363482 1.720944 0.785656  
 H11 -0.542720 -0.392386 -1.248824  
 H12 -1.706814 0.777787 -0.982576  
 H13 -2.465640 -0.986219 0.120515  
 H14 -0.984150 -1.302694 0.769940

**HE**

N1 2.217126 -0.278438 -0.058113  
 H2 2.555479 0.648037 -0.315617  
 H3 2.270478 -0.880530 -0.871609  
 N4 0.873455 -0.241323 0.388914  
 H5 0.897688 -0.097285 1.393128  
 C6 0.020034 0.754971 -0.252602  
 C7 -1.423443 0.497918 0.161670  
 H8 0.309301 1.793594 -0.013848  
 H9 0.111177 0.617122 -1.335656  
 H10 -1.532872 0.659155 1.247005  
 H11 -2.091380 1.199932 -0.344256  
 O12 -1.830542 -0.804154 -0.193706  
 H13 -1.089154 -1.385805 0.020488

**Cartesian coordinates for structures  
 in Rxns 5, calculated at  $\omega$ B97XD/  
 6-31+G(d,p)**

**[(HEHN)HE + H]<sup>+</sup>**

O1 -4.480615 -0.321588 1.601512  
 C2 -4.808905 -0.364806 0.224733  
 C3 -4.105774 0.831683 -0.393786  
 N4 -2.677362 0.791194 0.012934  
 N5 -1.981922 2.011019 -0.298733  
 H6 -4.928385 -1.022135 2.083828  
 H7 -5.885604 -0.263813 0.052027  
 H8 -4.463021 -1.298614 -0.237225  
 H9 -4.516021 1.771881 -0.019882  
 H10 -4.157838 0.807294 -1.484500  
 H11 -2.176866 -0.034401 -0.419281  
 H12 -2.667414 0.676715 1.031538

H13 -2.110005 2.173066 -1.295993  
 H14 -0.994285 1.791892 -0.159454  
 N15 -0.014523 -0.973370 -0.842878  
 O16 0.856826 -1.749033 -1.230030  
 O17 -1.195085 -1.067770 -1.240081  
 O18 0.281847 -0.044554 -0.013575  
 O19 4.420198 1.283062 -0.834234  
 C20 3.943363 1.627468 0.451456  
 C21 3.782972 0.307351 1.185596  
 N22 2.979162 -0.611419 0.337587  
 N23 3.019012 -1.959992 0.831397  
 H24 4.642362 2.065538 -1.346165  
 H25 2.983490 2.158098 0.389484  
 H26 4.651668 2.250903 1.007613  
 H27 3.271652 0.435818 2.142037  
 H28 4.746882 -0.179060 1.344293  
 H29 3.411329 -0.612249 -0.592863  
 H30 1.991733 -0.270797 0.214716  
 H31 2.438678 -2.504330 0.193202  
 H32 2.555772 -1.958942 1.737757

**[(HE)<sub>2</sub> + H]<sup>+</sup>**

O1 -2.085492 -1.439869 -0.825220  
 C2 -2.746950 -0.188849 -0.809156  
 C3 -2.322517 0.497570 0.475819  
 N4 -0.842348 0.479701 0.568422  
 N5 -0.358036 1.214926 1.704249  
 H6 -2.424130 -1.993178 -1.534644  
 H7 -3.837279 -0.294666 -0.803188  
 H8 -2.462722 0.419097 -1.679388  
 H9 -2.713855 -0.033761 1.346803  
 H10 -2.645683 1.539156 0.511056  
 H11 -0.416173 0.961077 -0.260868  
 H12 -0.480002 -0.491371 0.564841  
 H13 -0.676331 0.729652 2.540380  
 H14 0.658704 1.116776 1.652618  
 N15 1.029514 1.810851 -1.045303  
 H16 1.351434 1.970206 -2.001242  
 H17 0.998046 2.714630 -0.579895  
 N18 1.921122 0.967849 -0.301135  
 H19 2.852323 1.376536 -0.264782  
 C20 1.993439 -0.372952 -0.894712  
 C21 2.241405 -1.432810 0.161945  
 H22 1.033767 -0.580668 -1.380274  
 H23 2.767037 -0.446213 -1.671270  
 H24 2.401136 -2.396464 -0.333871  
 H25 3.133202 -1.189893 0.752880  
 O26 1.093972 -1.493242 1.009789  
 H27 1.148661 -2.267080 1.577274

**HNO<sub>3</sub>**

N1 0.000000 0.144358 0.000000  
 O2 1.175229 0.440613 0.000000  
 O3 -0.967887 0.848121 0.000000  
 O4 -0.281663 -1.211283 0.000000  
 H5 0.594568 -1.630119 0.000000

**[HE + H]<sup>+</sup>**

O1 1.353141 -0.806526 -0.426858  
 C2 1.223684 0.234158 0.526470  
 C3 0.084362 1.102238 0.008007  
 N4 -0.990024 0.202679 -0.535109  
 N5 -1.626194 -0.558328 0.504662  
 H6 2.172580 -1.296881 -0.310192  
 H7 2.124798 0.850458 0.599256  
 H8 0.995926 -0.164393 1.522043  
 H9 0.409620 1.716766 -0.834684  
 H10 -0.363482 1.720944 0.785656  
 H11 -0.542720 -0.392386 -1.248824  
 H12 -1.706814 0.777787 -0.982576  
 H13 -2.465640 -0.986219 0.120515  
 H14 -0.984150 -1.302694 0.769940

**HE·HNO<sub>3</sub>**

O1 -1.172026 -1.995635 -0.598390  
 C2 -1.344870 -1.435904 0.689833  
 C3 -1.969873 -0.048665 0.601891  
 N4 -1.141460 0.810426 -0.257126  
 N5 -1.682866 2.128758 -0.337562  
 H6 -0.248609 -1.880244 -0.853309  
 H7 -0.388835 -1.384387 1.224925  
 H8 -2.012044 -2.087572 1.261950  
 H9 -2.024577 0.420859 1.587210  
 H10 -2.985503 -0.120205 0.191931  
 H11 -1.079782 0.365516 -1.174698  
 H12 0.207777 0.865168 0.222571  
 H13 -2.425363 2.170640 -1.030819  
 H14 -0.941363 2.764172 -0.611940  
 N15 2.001754 0.066496 -0.010221  
 O16 3.172594 0.061062 0.274492  
 O17 1.237529 0.964942 0.603843  
 O18 1.454999 -0.686156 -0.821671

**Cartesian coordinates for structures  
 in Rxns 6, calculated at  $\omega$ B97XD/  
 6-31+G(d,p)**

**[(HEHN)<sub>2</sub>HE + H]<sup>+</sup>**

O1 -2.161562 -1.933708 -0.823146  
 C2 -1.864510 -3.259619 -0.413632

C3 -0.373571 -3.571428 -0.453699  
 N4 0.394183 -2.564231 0.322941  
 N5 1.775203 -2.939920 0.475529  
 H6 -1.672401 -1.716542 -1.636846  
 H7 -2.384429 -3.988712 -1.044638  
 H8 -2.251176 -3.359600 0.604282  
 H9 0.017473 -3.554424 -1.474263  
 H10 -0.167070 -4.549597 -0.016108  
 H11 -0.024567 -2.431888 1.259816  
 H12 0.293008 -1.625018 -0.122665  
 H13 2.080736 -2.494600 1.339059  
 H14 2.286982 -2.482413 -0.280542  
 N15 0.017508 -0.173713 2.262059  
 O16 -0.321096 1.029181 2.201564  
 O17 -0.859950 -1.066456 2.284231  
 O18 1.231656 -0.484603 2.251762  
 O19 -1.077379 2.870509 -0.646044  
 C20 -2.481366 2.800557 -0.812532  
 C21 -2.941910 1.348823 -0.860441  
 N22 -2.476390 0.633704 0.361080  
 N23 -3.290399 0.936089 1.502209  
 H24 -0.632613 2.572936 -1.453897  
 H25 -2.813978 3.311480 -1.722179  
 H26 -2.922681 3.303412 0.050112  
 H27 -2.510517 0.825017 -1.718399  
 H28 -4.029039 1.264145 -0.912860  
 H29 -1.527286 0.977330 0.584853  
 H30 -2.375019 -0.381107 0.163480  
 H31 -2.714059 0.737911 2.318988  
 H32 -4.079358 0.295326 1.499719  
 N33 0.136290 0.141917 -1.932171  
 O34 -0.292583 -0.791759 -2.622866  
 O35 0.128260 0.020098 -0.656505  
 O36 0.556669 1.198091 -2.418095  
 O37 3.029529 -0.607629 -1.084001  
 C38 3.856628 0.172067 -0.233130  
 C39 3.362456 1.603405 -0.070855  
 N40 2.020725 1.638812 0.561800  
 N41 1.631625 2.981537 0.896828  
 H42 3.224751 -0.409211 -2.005682  
 H43 4.889453 0.201147 -0.595433  
 H44 3.862319 -0.335405 0.736376  
 H45 3.279252 2.108385 -1.037029  
 H46 4.033553 2.177676 0.571432  
 H47 2.017990 1.086627 1.436459  
 H48 1.319768 1.147059 -0.034931  
 H49 0.798076 2.881409 1.475326  
 H50 1.324924 3.426662 0.034177

**[(HEHN)(HE)<sub>2</sub> + H]<sup>+</sup>**

O1 -1.856843 -1.963434 1.410265  
 C2 -2.701640 -2.688414 0.542843  
 C3 -3.878474 -1.805546 0.138900  
 N4 -3.339843 -0.483704 -0.269977  
 N5 -4.247542 0.262361 -1.095892  
 H6 -0.973419 -1.932792 1.011016  
 H7 -3.085598 -3.586416 1.037734  
 H8 -2.157573 -3.004426 -0.356252  
 H9 -4.562820 -1.637852 0.974373  
 H10 -4.428573 -2.221516 -0.707597  
 H11 -2.474088 -0.628461 -0.813923  
 H12 -3.053733 0.082056 0.576893  
 H13 -3.797747 1.162456 -1.264755  
 H14 -5.085271 0.436255 -0.544508  
 N15 -2.510751 1.581166 1.390035  
 H16 -3.230301 2.268869 1.593026  
 H17 -1.950055 1.464122 2.236940  
 N18 -1.736916 2.056670 0.289590  
 H19 -1.171929 1.272344 -0.029450  
 C20 -0.842736 3.168445 0.605906  
 C21 0.182966 3.333657 -0.503408  
 H22 -1.426989 4.090388 0.700394  
 H23 -0.312030 3.004479 1.558755  
 H24 -0.315165 3.446964 -1.471037  
 H25 0.784405 4.227087 -0.316656  
 O26 1.057480 2.204124 -0.528964  
 H27 0.956042 1.675894 -1.330508  
 N28 0.384602 -0.872137 -1.060720  
 O29 -0.717734 -0.365192 -1.342171  
 O30 1.417631 -0.446599 -1.630557  
 O31 0.480423 -1.781940 -0.204349  
 O32 2.994962 1.133357 1.086794  
 C33 4.071610 0.983791 0.185983  
 C34 4.526911 -0.473164 0.253313  
 N35 3.298908 -1.305865 0.191748  
 N36 3.550224 -2.708225 0.333461  
 H37 2.285662 1.633091 0.641923  
 H38 4.912312 1.630924 0.457666  
 H39 3.763014 1.233414 -0.836702  
 H40 5.022804 -0.710889 1.196065  
 H41 5.179882 -0.738879 -0.580832  
 H42 2.723742 -1.062742 -0.648417  
 H43 2.722750 -0.999299 0.984033  
 H44 4.084087 -3.007088 -0.479241  
 H45 2.640637 -3.164971 0.293970

**[(HE)<sub>3</sub> + H]<sup>+</sup>**

O1 -0.294204 -0.059411 1.922145  
 C2 -0.506412 1.313952 2.140066

C3 -0.234573 2.144738 0.890482  
 N4 -1.013511 1.627343 -0.261022  
 N5 -0.801421 2.450294 -1.421461  
 H6 0.628080 -0.338031 2.109085  
 H7 0.115394 1.706322 2.953094  
 H8 -1.552246 1.435728 2.443721  
 H9 0.813134 2.097513 0.590336  
 H10 -0.514870 3.190896 1.032535  
 H11 -2.014295 1.605135 -0.033864  
 H12 -0.796326 0.609327 -0.459387  
 H13 -1.493423 2.177683 -2.114848  
 H14 0.122824 2.181896 -1.771282  
 N15 -0.079643 -1.424012 -2.100018  
 H16 -0.657747 -1.128980 -2.881978  
 H17 0.074234 -2.428203 -2.197016  
 N18 -0.764695 -1.111435 -0.888495  
 H19 -0.090135 -1.272116 -0.137801  
 C20 -2.005256 -1.868594 -0.681495  
 C21 -2.818767 -1.329223 0.482533  
 H22 -2.601013 -1.783404 -1.596334  
 H23 -1.805241 -2.937363 -0.509132  
 H24 -3.679024 -1.989656 0.629158  
 H25 -2.219114 -1.310771 1.398171  
 O26 -3.264773 0.001029 0.180304  
 H27 -4.131019 0.140003 0.571545  
 N28 2.093131 -1.472598 1.867948  
 H29 2.977860 -1.542229 2.374064  
 H30 1.606443 -2.356778 1.982977  
 N31 2.293043 -1.249699 0.465792  
 H32 2.895667 -1.975491 0.078592  
 C33 2.946095 0.046021 0.273177  
 C34 2.897136 0.497311 -1.180609  
 H35 2.412257 0.769856 0.894708  
 H36 3.994046 0.038220 0.616173  
 H37 3.454483 1.433235 -1.275003  
 H38 3.389655 -0.239975 -1.829404  
 O39 1.577661 0.741415 -1.624137  
 H40 1.163250 -0.111565 -1.878737

**[(HEHN)HE + H]<sup>+</sup>**

O1 -4.480615 -0.321588 1.601512  
 C2 -4.808905 -0.364806 0.224733  
 C3 -4.105774 0.831683 -0.393786  
 N4 -2.677362 0.791194 0.012934  
 N5 -1.981922 2.011019 -0.298733  
 H6 -4.928385 -1.022135 2.083828  
 H7 -5.885604 -0.263813 0.052027  
 H8 -4.463021 -1.298614 -0.237225  
 H9 -4.516021 1.771881 -0.019882  
 H10 -4.157838 0.807294 -1.484500

H11 -2.176866 -0.034401 -0.419281  
 H12 -2.667414 0.676715 1.031538  
 H13 -2.110005 2.173066 -1.295993  
 H14 -0.994285 1.791892 -0.159454  
 N15 -0.014523 -0.973370 -0.842878  
 O16 0.856826 -1.749033 -1.230030  
 O17 -1.195085 -1.067770 -1.240081  
 O18 0.281847 -0.044554 -0.013575  
 O19 4.420198 1.283062 -0.834234  
 C20 3.943363 1.627468 0.451456  
 C21 3.782972 0.307351 1.185596  
 N22 2.979162 -0.611419 0.337587  
 N23 3.019012 -1.959992 0.831397  
 H24 4.642362 2.065538 -1.346165  
 H25 2.983490 2.158098 0.389484  
 H26 4.651668 2.250903 1.007613  
 H27 3.271652 0.435818 2.142037  
 H28 4.746882 -0.179060 1.344293  
 H29 3.411329 -0.612249 -0.592863  
 H30 1.991733 -0.270797 0.214716  
 H31 2.438678 -2.504330 0.193202  
 H32 2.555772 -1.958942 1.737757

**HE·HNO<sub>3</sub>**

O1 -1.172026 -1.995635 -0.598390  
 C2 -1.344870 -1.435904 0.689833  
 C3 -1.969873 -0.048665 0.601891  
 N4 -1.141460 0.810426 -0.257126  
 N5 -1.682866 2.128758 -0.337562  
 H6 -0.248609 -1.880244 -0.853309  
 H7 -0.388835 -1.384387 1.224925  
 H8 -2.012044 -2.087572 1.261950  
 H9 -2.024577 0.420859 1.587210  
 H10 -2.985503 -0.120205 0.191931  
 H11 -1.079782 0.365516 -1.174698  
 H12 0.207777 0.865168 0.222571  
 H13 -2.425363 2.170640 -1.030819  
 H14 -0.941363 2.764172 -0.611940  
 N15 2.001754 0.066496 -0.010221  
 O16 3.172594 0.061062 0.274492  
 O17 1.237529 0.964942 0.603843  
 O18 1.454999 -0.686156 -0.821671

**[(HE)<sub>2</sub> + H]<sup>+</sup>**

O1 -2.085492 -1.439869 -0.825220  
 C2 -2.746950 -0.188849 -0.809156  
 C3 -2.322517 0.497570 0.475819  
 N4 -0.842348 0.479701 0.568422  
 N5 -0.358036 1.214926 1.704249

H6 -2.424130 -1.993178 -1.534644  
 H7 -3.837279 -0.294666 -0.803188  
 H8 -2.462722 0.419097 -1.679388  
 H9 -2.713855 -0.033761 1.346803  
 H10 -2.645683 1.539156 0.511056  
 H11 -0.416173 0.961077 -0.260868  
 H12 -0.480002 -0.491371 0.564841  
 H13 -0.676331 0.729652 2.540380  
 H14 0.658704 1.116776 1.652618  
 N15 1.029514 1.810851 -1.045303  
 H16 1.351434 1.970206 -2.001242  
 H17 0.998046 2.714630 -0.579895  
 N18 1.921122 0.967849 -0.301135  
 H19 2.852323 1.376536 -0.264782  
 C20 1.993439 -0.372952 -0.894712  
 C21 2.241405 -1.432810 0.161945  
 H22 1.033767 -0.580668 -1.380274  
 H23 2.767037 -0.446213 -1.671270  
 H24 2.401136 -2.396464 -0.333871  
 H25 3.133202 -1.189893 0.752880  
 O26 1.093972 -1.493242 1.009789  
 H27 1.148661 -2.267080 1.577274

**Cartesian coordinates for structures  
in Rxns 7, calculated at ωB97XD/  
6-31+G(d,p)****[(HEHN)(HE)<sub>2</sub> + H]<sup>+</sup>**

O1 -1.856843 -1.963434 1.410265  
 C2 -2.701640 -2.688414 0.542843  
 C3 -3.878474 -1.805546 0.138900  
 N4 -3.339843 -0.483704 -0.269977  
 N5 -4.247542 0.262361 -1.095892  
 H6 -0.973419 -1.932792 1.011016  
 H7 -3.085598 -3.586416 1.037734  
 H8 -2.157573 -3.004426 -0.356252  
 H9 -4.562820 -1.637852 0.974373  
 H10 -4.428573 -2.221516 -0.707597  
 H11 -2.474088 -0.628461 -0.813923  
 H12 -3.053733 0.082056 0.576893  
 H13 -3.797747 1.162456 -1.264755  
 H14 -5.085271 0.436255 -0.544508  
 N15 -2.510751 1.581166 1.390035  
 H16 -3.230301 2.268869 1.593026  
 H17 -1.950055 1.464122 2.236940  
 N18 -1.736916 2.056670 0.289590  
 H19 -1.171929 1.272344 -0.029450  
 C20 -0.842736 3.168445 0.605906  
 C21 0.182966 3.333657 -0.503408  
 H22 -1.426989 4.090388 0.700394

H23 -0.312030 3.004479 1.558755  
 H24 -0.315165 3.446964 -1.471037  
 H25 0.784405 4.227087 -0.316656  
 O26 1.057480 2.204124 -0.528964  
 H27 0.956042 1.675894 -1.330508  
 N28 0.384602 -0.872137 -1.060720  
 O29 -0.717734 -0.365192 -1.342171  
 O30 1.417631 -0.446599 -1.630557  
 O31 0.480423 -1.781940 -0.204349  
 O32 2.994962 1.133357 1.086794  
 C33 4.071610 0.983791 0.185983  
 C34 4.526911 -0.473164 0.253313  
 N35 3.298908 -1.305865 0.191748  
 N36 3.550224 -2.708225 0.333461  
 H37 2.285662 1.633091 0.641923  
 H38 4.912312 1.630924 0.457666  
 H39 3.763014 1.233414 -0.836702  
 H40 5.022804 -0.710889 1.196065  
 H41 5.179882 -0.738879 -0.580832  
 H42 2.723742 -1.062742 -0.648417  
 H43 2.722750 -0.999299 0.984033  
 H44 4.084087 -3.007088 -0.479241  
 H45 2.640637 -3.164971 0.293970

**Cartesian coordinates for structures  
 in Rxns 8, calculated at  $\omega$ B97XD/  
 6-31+G(d,p)**

**[(HEHN)<sub>2</sub>(HE)<sub>2</sub> + H]<sup>+</sup>**

N1 -1.470219 3.404237 -1.322582  
 H2 -1.596644 4.172478 -0.667839  
 H3 -1.431602 3.821613 -2.253819  
 N4 -0.238586 2.750075 -1.000659  
 H5 -0.161615 1.960365 -1.645851  
 C6 0.950737 3.604665 -1.049439  
 C7 2.215259 2.758690 -0.940526  
 H8 1.001497 4.183875 -1.984480  
 H9 0.894683 4.311498 -0.213703  
 H10 2.349649 2.162993 -1.849961  
 H11 3.077507 3.419582 -0.828342  
 O12 2.193037 1.893861 0.193815  
 H13 1.757097 1.066059 -0.065582  
 O14 4.338023 0.201533 0.924281  
 C15 4.703465 -0.292188 -0.344791  
 C16 4.434816 -1.789901 -0.368098  
 N17 3.005996 -2.023395 -0.046445  
 N18 2.666896 -3.417557 -0.026783  
 H19 3.756782 0.970138 0.817090  
 H20 5.770022 -0.128133 -0.535505  
 H21 4.137616 0.200649 -1.146278

H22 5.029623 -2.294747 0.397449  
 H23 4.636452 -2.240782 -1.341062  
 H24 2.413873 -1.565164 -0.766984  
 H25 2.751917 -1.525028 0.824563  
 H26 3.172258 -3.833029 0.753312  
 H27 1.676065 -3.446681 0.216841  
 O28 -3.240329 -1.719810 1.432493  
 C29 -3.182456 -2.877276 0.632317  
 C30 -3.670626 -2.516164 -0.760644  
 N31 -2.816208 -1.438856 -1.321393  
 N32 -3.242117 -1.053285 -2.638257  
 H33 -2.400112 -1.606673 1.909413  
 H34 -3.836287 -3.662152 1.030159  
 H35 -2.161243 -3.277608 0.589809  
 H36 -4.691991 -2.131977 -0.741782  
 H37 -3.619213 -3.376167 -1.434110  
 H38 -1.811708 -1.714779 -1.311761  
 H39 -2.892734 -0.583954 -0.732286  
 H40 -2.550388 -0.374188 -2.953527  
 H41 -3.146918 -1.872434 -3.235131  
 O42 -2.751533 1.145511 -0.167053  
 C43 -3.179431 1.519767 1.131607  
 C44 -2.155641 2.398541 1.853787  
 N45 -0.783149 1.888996 1.623946  
 N46 0.196079 2.664972 2.331094  
 H47 -2.579817 1.934140 -0.724411  
 H48 -3.335031 0.582707 1.667956  
 H49 -4.135351 2.054944 1.100450  
 H50 -2.353307 2.399655 2.928804  
 H51 -2.166772 3.435483 1.510998  
 H52 -0.557360 2.030883 0.599635  
 H53 -0.737508 0.870764 1.858228  
 H54 0.206333 2.342949 3.295919  
 H55 1.094619 2.425981 1.905440  
 N56 0.326324 -0.626368 -1.799515  
 O57 1.510731 -0.242400 -1.624413  
 O58 -0.006126 -1.777097 -1.444150  
 O59 -0.505466 0.147274 -2.311053  
 N60 0.199679 -1.300303 1.785274  
 O61 1.147706 -0.539742 1.473843  
 O62 0.252476 -2.516103 1.598824  
 O63 -0.834769 -0.779236 2.299450

**Cartesian coordinates for structures  
 in Rxns 9, calculated at B97XD/  
 6-31+G(d,p)**

**[HOCH<sub>2</sub>CH<sub>2</sub>NHNHCHCH<sub>3</sub>]<sup>+</sup>·H<sub>2</sub>O**

O1 -0.990027 2.093525 -0.205134  
 C2 -1.667922 -0.248996 0.577808

C3 -2.480594 -0.613537 -0.593526  
 H4 -1.251622 2.966821 -0.508754  
 H5 -2.077198 0.373392 1.366739  
 H6 -3.110599 0.234917 -0.863141  
 H7 -3.142998 -1.444911 -0.319577  
 N8 -0.467808 -0.672220 0.786424  
 H9 -0.033603 2.112026 -0.045264  
 H10 0.052335 -0.319668 1.590332  
 N11 0.232681 -1.457110 -0.135172  
 H12 0.036934 -2.434725 0.064273  
 C13 1.674519 -1.186943 -0.130306  
 C14 1.992838 0.225651 -0.594365  
 H15 2.128530 -1.363007 0.856778  
 H16 2.105025 -1.905297 -0.832528  
 H17 3.064775 0.305031 -0.792107  
 H18 1.450626 0.448810 -1.518005  
 O19 1.591162 1.175164 0.401354  
 H20 2.355248 1.645182 0.746290  
 H21 -1.853688 -0.919832 -1.431224

**[HOCH<sub>2</sub>CH<sub>2</sub>NHNHCHCH<sub>3</sub>]<sup>+</sup>**

C1 1.694539 0.010182 -0.496752  
 C2 2.025786 0.719878 0.744145  
 H3 2.248434 0.223584 -1.408979  
 H4 1.828529 1.784424 0.567715  
 H5 3.100932 0.627772 0.930590  
 N6 0.768186 -0.873112 -0.625294  
 H7 0.581877 -1.258636 -1.552621  
 N8 -0.089538 -1.225613 0.426152  
 H9 0.007191 -2.227532 0.569274  
 C10 -1.488228 -0.856284 0.139200  
 C11 -1.738250 0.625022 0.350162  
 H12 -1.785410 -1.146958 -0.878975  
 H13 -2.096624 -1.427107 0.844705  
 H14 -2.803869 0.818653 0.184580  
 H15 -1.486864 0.899417 1.382200  
 O16 -0.934237 1.349625 -0.573221  
 H17 -1.279565 2.241257 -0.672566  
 H18 1.445641 0.366407 1.593307

**[HOCH<sub>2</sub>CH<sub>2</sub>N(NH<sub>2</sub>)CHCH<sub>3</sub>]<sup>+</sup>·H<sub>2</sub>O**

C1 2.744110 0.208195 0.191081  
 C2 1.356223 0.135052 0.702247  
 H3 1.094685 -0.505295 1.534840  
 O4 0.839375 -2.392876 -0.332959  
 H5 0.723387 -3.212294 0.158908  
 H6 2.763937 0.044762 -0.891819  
 H7 3.189095 1.189691 0.401411  
 H8 3.358289 -0.551084 0.671594  
 N9 0.546082 1.597009 -0.931603

N10 0.384057 0.813710 0.200535  
 C11 -1.011915 0.655053 0.643140  
 C12 -1.840324 -0.132667 -0.374650  
 H13 -1.891526 0.404656 -1.330446  
 H14 -1.364439 -1.107234 -0.542317  
 O15 -3.100502 -0.241045 0.237331  
 H16 -3.715833 -0.701013 -0.340667  
 H17 -1.436015 1.649709 0.807230  
 H18 -1.002397 0.126641 1.596395  
 H19 1.063973 -2.667695 -1.227618  
 H20 1.471371 2.011307 -0.970642  
 H21 -0.165054 2.320381 -0.955282

**[HOCH<sub>2</sub>CH<sub>2</sub>N(NH<sub>2</sub>)CHCH<sub>3</sub>]<sup>+</sup>**

C1 -2.845633 -0.523973 0.314016  
 C2 -1.462502 -0.775374 -0.155328  
 H3 -1.121564 -1.774603 -0.404526  
 H4 -2.839486 -0.011119 1.283438  
 H5 -3.397845 0.100815 -0.400549  
 H6 -3.383777 -1.464628 0.419180  
 N7 -0.825258 1.458604 0.088992  
 N8 -0.578778 0.154556 -0.283947  
 C9 0.822473 -0.119798 -0.658702  
 C10 1.759381 -0.025752 0.549430  
 H11 1.728437 0.980738 0.985452  
 H12 1.437911 -0.745365 1.315598  
 O13 3.016348 -0.339131 0.015393  
 H14 3.698105 -0.274825 0.690756  
 H15 1.114850 0.595864 -1.431610  
 H16 0.866082 -1.120646 -1.088608  
 H17 -1.805878 1.705719 0.015218  
 H18 -0.241679 2.098357 -0.439303

**Cartesian coordinates for structures  
in Rxns 10, calculated at ωB97XD/  
6-31+G(d,p)**

**[HE][HOCH<sub>2</sub>CH<sub>2</sub>NHNHCHCH<sub>3</sub>]<sup>+</sup>·H<sub>2</sub>O**

O1 -2.802667 2.427519 -0.301599  
 C2 -0.495420 1.178405 -0.519235  
 C3 0.139384 1.705103 0.696383  
 H4 -3.338506 3.217313 -0.194379  
 H5 -0.561876 1.793594 -1.410173  
 H6 -0.207830 2.730330 0.841222  
 H7 1.229440 1.735380 0.551676  
 N8 -0.992214 -0.003168 -0.640350  
 H9 -3.407681 1.669644 -0.340134  
 H10 -1.468848 -0.248577 -1.507863  
 N11 -0.986997 -0.949636 0.386072  
 H12 -0.131542 -1.523871 0.271353



C13 -2.189824 -1.779983 0.376463  
 C14 -3.451214 -0.987397 0.685243  
 H15 -2.322980 -2.315487 -0.577956  
 H16 -2.030301 -2.529185 1.156377  
 H17 -4.260525 -1.674359 0.946814  
 H18 -3.273841 -0.319724 1.533367  
 O19 -3.823236 -0.178733 -0.438174  
 H20 -4.638546 -0.502487 -0.829518  
 H21 -0.091733 1.090530 1.566293  
 H22 1.936828 -0.403701 0.698609  
 N23 2.166032 -0.834493 -0.192679  
 N24 1.634998 -2.157417 -0.145794  
 H25 1.655618 -2.536117 -1.088140  
 H26 2.201331 -2.775234 0.439744  
 C27 4.039790 0.694336 -0.372249  
 H28 5.132707 0.756728 -0.404420  
 H29 3.631552 1.190460 -1.262124  
 C30 3.617322 -0.763680 -0.357279  
 H31 3.887458 -1.225292 -1.312844  
 H32 4.147864 -1.299233 0.446952  
 O33 3.520831 1.303902 0.806681  
 H34 4.039019 2.080082 1.033167

**[HE][HOCH<sub>2</sub>CH<sub>2</sub>NHNHCHCH<sub>3</sub>]<sup>+</sup>**

C1 -1.037594 1.641605 0.422406  
 C2 -2.352293 2.185302 0.806221  
 H3 -0.283844 2.298758 -0.007924  
 H4 -2.913886 2.366632 -0.117362  
 H5 -2.218315 3.147761 1.306133  
 N6 -0.666856 0.421814 0.541543  
 H7 0.324351 0.112314 0.278879  
 N8 -1.517044 -0.568743 1.072469  
 H9 -0.914631 -1.112111 1.690262  
 C10 -2.032529 -1.467958 0.023264  
 C11 -3.181072 -0.876925 -0.770740  
 H12 -1.241121 -1.785422 -0.671316  
 H13 -2.396136 -2.351354 0.554595  
 H14 -3.617910 -1.675699 -1.381465  
 H15 -3.950502 -0.503495 -0.082518  
 O16 -2.681138 0.171100 -1.591281  
 H17 -3.315218 0.362781 -2.287524  
 H18 -2.907323 1.487565 1.431885  
 H19 2.227265 -0.082031 1.156610  
 N20 1.842406 -0.640986 0.396164  
 N21 1.410371 -1.876370 0.978942  
 H22 1.020824 -2.448248 0.233924  
 H23 2.202769 -2.393903 1.361232  
 C24 3.316058 0.622661 -1.071258  
 H25 4.163545 0.535727 -1.760048  
 H26 2.490837 1.122434 -1.598651

C27 2.887991 -0.765523 -0.629563  
 H28 2.482636 -1.318723 -1.482647  
 H29 3.753669 -1.315390 -0.234574  
 O30 3.660538 1.335002 0.105674  
 H31 4.172290 2.118616 -0.110451

**[HOCH<sub>2</sub>CH<sub>2</sub>NHNHCHCH<sub>3</sub>]<sup>+</sup>·H<sub>2</sub>O**

O1 -0.990027 2.093525 -0.205134  
 C2 -1.667922 -0.248996 0.577808  
 C3 -2.480594 -0.613537 -0.593526  
 H4 -1.251622 2.966821 -0.508754  
 H5 -2.077198 0.373392 1.366739  
 H6 -3.110599 0.234917 -0.863141  
 H7 -3.142998 -1.444911 -0.319577  
 N8 -0.467808 -0.672220 0.786424  
 H9 -0.033603 2.112026 -0.045264  
 H10 0.052335 -0.319668 1.590332  
 N11 0.232681 -1.457110 -0.135172  
 H12 0.036934 -2.434725 0.064273  
 C13 1.674519 -1.186943 -0.130306  
 C14 1.992838 0.225651 -0.594365  
 H15 2.128530 -1.363007 0.856778  
 H16 2.105025 -1.905297 -0.832528  
 H17 3.064775 0.305031 -0.792107  
 H18 1.450626 0.448810 -1.518005  
 O19 1.591162 1.175164 0.401354  
 H20 2.355248 1.645182 0.746290  
 H21 -1.853688 -0.919832 -1.431224

**HE**

N1 2.217126 -0.278438 -0.058113  
 H2 2.555479 0.648037 -0.315617  
 H3 2.270478 -0.880530 -0.871609  
 N4 0.873455 -0.241323 0.388914  
 H5 0.897688 -0.097285 1.393128  
 C6 0.020034 0.754971 -0.252602  
 C7 -1.423443 0.497918 0.161670  
 H8 0.309301 1.793594 -0.013848  
 H9 0.111177 0.617122 -1.335656  
 H10 -1.532872 0.659155 1.247005  
 H11 -2.091380 1.199932 -0.344256  
 O12 -1.830542 -0.804154 -0.193706  
 H13 -1.089154 -1.385805 0.020488

**[HE + H]<sup>+</sup>**

O1 1.353141 -0.806526 -0.426858  
 C2 1.223684 0.234158 0.526470  
 C3 0.084362 1.102238 0.008007  
 N4 -0.990024 0.202679 -0.535109  
 N5 -1.626194 -0.558328 0.504662

H6 2.172580 -1.296881 -0.310192  
H7 2.124798 0.850458 0.599256  
H8 0.995926 -0.164393 1.522043  
H9 0.409620 1.716766 -0.834684  
H10 -0.363482 1.720944 0.785656  
H11 -0.542720 -0.392386 -1.248824  
H12 -1.706814 0.777787 -0.982576  
H13 -2.465640 -0.986219 0.120515  
H14 -0.984150 -1.302694 0.769940

**HOCH<sub>2</sub>CH<sub>2</sub>NHNC<sub>2</sub>H<sub>5</sub>**

C1 -1.853222 0.598223 -0.477424  
C2 -2.500830 -0.702877 -0.104237  
H3 -2.362266 1.225927 -1.208253  
H4 -2.197834 -1.514969 -0.776056  
H5 -3.587164 -0.608608 -0.181500  
N6 -0.785110 1.113795 -0.001905  
N7 -0.087323 0.361681 0.963072  
H8 0.620657 0.994410 1.320583  
C9 0.616982 -0.816384 0.453651  
C10 1.642949 -0.511155 -0.630192  
H11 1.129314 -1.265490 1.310843  
H12 -0.096469 -1.555500 0.080420  
H13 2.089291 -1.451138 -0.985087  
H14 1.151156 -0.015418 -1.476681  
O15 2.632718 0.328550 -0.054497  
H16 3.093714 0.807237 -0.746348  
H17 -2.230384 -0.980021 0.919102

**Cartesian coordinates for structures  
in Figure S2, calculated at  $\omega$ B97XD/  
6-31+G(d,p)**

**[(HE)<sub>2</sub> + H]<sup>+</sup>**

O1 -2.085492 -1.439869 -0.825220  
 C2 -2.746950 -0.188849 -0.809156  
 C3 -2.322517 0.497570 0.475819  
 N4 -0.842348 0.479701 0.568422  
 N5 -0.358036 1.214926 1.704249  
 H6 -2.424130 -1.993178 -1.534644  
 H7 -3.837279 -0.294666 -0.803188  
 H8 -2.462722 0.419097 -1.679388  
 H9 -2.713855 -0.033761 1.346803  
 H10 -2.645683 1.539156 0.511056  
 H11 -0.416173 0.961077 -0.260868  
 H12 -0.480002 -0.491371 0.564841  
 H13 -0.676331 0.729652 2.540380  
 H14 0.658704 1.116776 1.652618  
 N15 1.029514 1.810851 -1.045303  
 H16 1.351434 1.970206 -2.001242  
 H17 0.998046 2.714630 -0.579895  
 N18 1.921122 0.967849 -0.301135  
 H19 2.852323 1.376536 -0.264782  
 C20 1.993439 -0.372952 -0.894712  
 C21 2.241405 -1.432810 0.161945  
 H22 1.033767 -0.580668 -1.380274  
 H23 2.767037 -0.446213 -1.671270  
 H24 2.401136 -2.396464 -0.333871  
 H25 3.133202 -1.189893 0.752880  
 O26 1.093972 -1.493242 1.009789  
 H27 1.148661 -2.267080 1.577274

**TS1**

O1 -2.214971 1.961461 -0.523720  
 C2 -0.917237 0.752235 0.075947  
 C3 -1.805682 -0.488294 0.006376  
 H4 -2.215946 2.125017 -1.475410  
 H5 -0.835831 1.312486 0.996763  
 H6 -1.362485 -1.289401 0.604000  
 N7 0.916929 -0.260528 0.693484  
 H8 1.525315 0.506967 0.987225  
 H9 0.952976 -0.958218 1.443748  
 N10 1.488970 -0.754708 -0.520276  
 H11 0.937570 -1.555209 -0.811575  
 C12 2.902056 -1.129787 -0.395119  
 C13 3.804327 0.090774 -0.418053  
 H14 3.090402 -1.713975 0.519363  
 H15 3.149339 -1.757998 -1.255783  
 H16 4.848681 -0.235416 -0.349247

H17 3.658458 0.635213 -1.358616  
 O18 3.459894 0.915002 0.693831  
 H19 4.069721 1.655026 0.757865  
 H20 -1.879498 -0.834476 -1.026551  
 N21 -3.175813 -0.171616 0.430749  
 H22 -3.238413 -0.130348 1.447244  
 N23 -4.103716 -1.089389 -0.129114  
 H24 -4.206203 -1.924059 0.442166  
 H25 -5.004961 -0.634464 -0.213822  
 H26 -2.999268 1.385555 -0.278206  
 H27 -0.234625 0.985710 -0.728861

**[HOCH<sub>2</sub>CH<sub>2</sub>NHNH<sub>2</sub>CH<sub>2</sub>CH<sub>2</sub>NHNH<sub>2</sub>]<sup>+</sup>·H<sub>2</sub>O**

O1 -1.982147 2.389763 -0.555460  
 C2 -0.534115 0.132705 0.738569  
 C3 -1.599759 -0.787719 0.148946  
 H4 -2.438283 3.114396 -0.989367  
 H5 -0.707053 0.320956 1.802770  
 H6 -1.518140 -1.799403 0.588564  
 N7 0.822449 -0.488639 0.653189  
 H8 1.533487 0.157260 1.060957  
 H9 0.860518 -1.360670 1.197838  
 N10 1.266626 -0.672672 -0.705608  
 H11 0.739896 -1.446476 -1.100939  
 C12 2.713060 -0.924185 -0.761944  
 C13 3.494546 0.342578 -0.462754  
 H14 3.027593 -1.731804 -0.083475  
 H15 2.924501 -1.241785 -1.785251  
 H16 4.566629 0.141119 -0.548314  
 H17 3.208829 1.131141 -1.166108  
 O18 3.163777 0.726560 0.878421  
 H19 3.607137 1.544553 1.123917  
 H20 -1.472889 -0.877334 -0.932830  
 N21 -2.915731 -0.196908 0.350222  
 H22 -3.134986 -0.134850 1.343192  
 N23 -3.894186 -0.940298 -0.361408  
 H24 -4.288043 -1.694353 0.195175  
 H25 -4.637694 -0.317130 -0.651434  
 H26 -2.630791 1.689171 -0.374104  
 H27 -0.490253 1.083968 0.204062

**[HOCH<sub>2</sub>CH<sub>2</sub>NHNH<sub>2</sub>CH<sub>2</sub>CH<sub>2</sub>NHNH<sub>2</sub>]<sup>+</sup>**

C1 0.793598 -0.830484 0.009554  
 C2 1.932164 0.140869 0.307959  
 H3 0.964287 -1.804487 0.477258  
 H4 1.925259 0.419103 1.380168  
 N5 -0.511630 -0.339223 0.551165  
 H6 -1.272222 -1.022325 0.345386  
 H7 -0.460764 -0.245174 1.574660  
 N8 -0.955121 0.874261 -0.088801

H9 -0.351104 1.627170 0.229644  
 C10 -2.364773 1.151578 0.221981  
 C11 -3.281681 0.200764 -0.525890  
 H12 -2.571576 1.108346 1.301999  
 H13 -2.554355 2.172539 -0.116444  
 H14 -4.324318 0.438037 -0.293630  
 H15 -3.114184 0.290092 -1.603996  
 O16 -2.959446 -1.122831 -0.079504  
 H17 -3.518179 -1.779651 -0.506299  
 H18 1.818615 1.057110 -0.276597  
 N19 3.167325 -0.466094 -0.138855  
 H20 3.488753 -1.185206 0.503745  
 N21 4.159995 0.505537 -0.407948  
 H22 4.767750 0.678228 0.388172  
 H23 4.716714 0.194072 -1.194416  
 H24 0.661068 -0.962936 -1.064167

**TS2**

C1 -0.601876 0.567434 -0.308324  
 C2 -1.859838 -0.020643 0.339977  
 H3 -0.592883 1.659193 -0.211690  
 H4 -1.826245 0.142518 1.434006  
 N5 0.642661 0.084868 0.285738  
 H6 2.401363 2.313511 0.037822  
 H7 0.763818 0.413652 1.246198  
 N8 0.817957 -1.325001 0.169250  
 H9 0.373464 -1.845821 0.921660  
 C10 2.251043 -1.463845 0.125265  
 C11 2.676632 -0.424289 -0.811187  
 H12 2.765667 -1.328267 1.091101  
 H13 2.599191 -2.434150 -0.277699  
 H14 3.722751 -0.155372 -0.888985  
 H15 2.024698 -0.147624 -1.632812  
 O16 3.064308 1.662875 0.293271  
 H17 3.898886 2.141305 0.369166  
 H18 -1.897386 -1.098881 0.165282  
 N19 -3.032482 0.538747 -0.301268  
 H20 -3.164516 1.513585 -0.043101  
 N21 -4.184587 -0.242520 -0.039668  
 H22 -4.690771 0.065624 0.786443  
 H23 -4.797631 -0.201596 -0.844377  
 H24 -0.595483 0.314729 -1.371923

**cyclo-[CH<sub>2</sub>CH<sub>2</sub>NHNH<sup>+</sup>(CH<sub>2</sub>CH<sub>2</sub>NHNH<sub>2</sub>)]**

C1 -0.169079 0.742094 -0.152305  
 C2 -1.318026 -0.103038 0.392871  
 H3 -0.255421 1.796089 0.131355  
 H4 -1.276137 -0.142708 1.498189  
 N5 1.133634 0.266051 0.389233  
 H6 1.117644 0.322996 1.414531

N7 1.550982 -1.045456 -0.089451  
 H8 1.356462 -1.777129 0.591313  
 C9 2.959925 -0.590921 -0.218882  
 C10 2.428421 0.847742 -0.148511  
 H11 3.598719 -0.857732 0.627827  
 H12 3.420511 -0.901849 -1.154916  
 H13 2.894295 1.552971 0.537091  
 H14 2.233287 1.306748 -1.116984  
 H15 -1.230176 -1.125335 0.016498  
 N16 -2.557010 0.426190 -0.134757  
 H17 -2.868010 1.246472 0.378074  
 N18 -3.557409 -0.569676 -0.230321  
 H19 -4.159942 -0.601216 0.587509  
 H20 -4.118145 -0.390869 -1.054364  
 H21 -0.111913 0.656541 -1.238093

**TS3**

C1 1.973957 -1.258387 -0.555326  
 C2 1.532430 -0.057588 -1.124933  
 N3 1.815696 1.222175 -0.521369  
 N4 2.080327 1.127756 0.870206  
 H5 2.640776 -1.301029 0.296382  
 H6 1.831954 -2.183661 -1.103483  
 H7 1.446713 -0.008713 -2.210285  
 H8 2.533175 1.730204 -1.029738  
 H9 3.071596 0.992922 1.066413  
 H10 1.805352 2.005593 1.298150  
 N11 0.276552 -1.501547 0.821148  
 H12 0.652917 -0.969330 1.603202  
 H13 -0.041733 -2.424403 1.099744  
 N14 -0.669119 -0.754253 0.134448  
 H15 0.310290 -0.263690 -0.823803  
 C16 -1.362235 0.325420 0.862856  
 C17 -2.354454 0.953470 -0.098796  
 H18 -1.883686 -0.089319 1.732140  
 H19 -0.616797 1.053922 1.187478  
 H20 -2.963233 1.683787 0.445099  
 H21 -1.822173 1.467666 -0.909712  
 O22 -3.131988 -0.122050 -0.595555  
 H23 -3.818978 0.196399 -1.187689  
 H24 -1.352652 -1.350353 -0.333299

**[HE + H]<sup>+</sup>**

O1 1.353141 -0.806526 -0.426858  
 C2 1.223684 0.234158 0.526470  
 C3 0.084362 1.102238 0.008007  
 N4 -0.990024 0.202679 -0.535109  
 N5 -1.626194 -0.558328 0.504662  
 H6 2.172580 -1.296881 -0.310192  
 H7 2.124798 0.850458 0.599256

H8 0.995926 -0.164393 1.522043  
 H9 0.409620 1.716766 -0.834684  
 H10 -0.363482 1.720944 0.785656  
 H11 -0.542720 -0.392386 -1.248824  
 H12 -1.706814 0.777787 -0.982576  
 H13 -2.465640 -0.986219 0.120515  
 H14 -0.984150 -1.302694 0.769940

### CH<sub>2</sub>CHNHNH<sub>2</sub>

N1 -1.755825 -0.052331 0.174844  
 H2 -1.671786 -0.632683 1.005352  
 H3 -2.183407 -0.584515 -0.573705  
 N4 -0.507208 0.441293 -0.250666  
 H5 -0.379821 1.397234 0.051986  
 C6 0.617627 -0.368522 -0.132054  
 C7 1.863769 0.048432 0.122950  
 H8 0.409324 -1.419744 -0.323961  
 H9 2.091764 1.092294 0.319134  
 H10 2.686776 -0.654785 0.106578

### H<sub>2</sub>O

O1 0.000000 0.000000 0.115787  
 H2 0.000000 0.765916 -0.463148  
 H3 0.000000 -0.765916 -0.463148

### Cartesian coordinates for structures in Figure S3, calculated at $\omega$ B97XD/ 6-31+G(d,p)

#### [(HE)<sub>2</sub> + H]<sup>+</sup>

O1 -2.085492 -1.439869 -0.825220  
 C2 -2.746950 -0.188849 -0.809156  
 C3 -2.322517 0.497570 0.475819  
 N4 -0.842348 0.479701 0.568422  
 N5 -0.358036 1.214926 1.704249  
 H6 -2.424130 -1.993178 -1.534644  
 H7 -3.837279 -0.294666 -0.803188  
 H8 -2.462722 0.419097 -1.679388  
 H9 -2.713855 -0.033761 1.346803  
 H10 -2.645683 1.539156 0.511056  
 H11 -0.416173 0.961077 -0.260868  
 H12 -0.480002 -0.491371 0.564841  
 H13 -0.676331 0.729652 2.540380  
 H14 0.658704 1.116776 1.652618  
 N15 1.029514 1.810851 -1.045303  
 H16 1.351434 1.970206 -2.001242  
 H17 0.998046 2.714630 -0.579895  
 N18 1.921122 0.967849 -0.301135  
 H19 2.852323 1.376536 -0.264782  
 C20 1.993439 -0.372952 -0.894712

C21 2.241405 -1.432810 0.161945  
 H22 1.033767 -0.580668 -1.380274  
 H23 2.767037 -0.446213 -1.671270  
 H24 2.401136 -2.396464 -0.333871  
 H25 3.133202 -1.189893 0.752880  
 O26 1.093972 -1.493242 1.009789  
 H27 1.148661 -2.267080 1.577274

### TS1

N1 2.638775 -1.029993 -0.218089  
 C2 1.746040 -0.166869 -0.973252  
 C3 1.461288 1.105310 -0.292996  
 H4 0.723255 1.762186 -0.725906  
 H5 1.449077 0.573230 2.381549  
 H6 0.827847 -0.707755 -1.219013  
 H7 2.177435 0.170739 -1.940681  
 N8 -1.124122 1.048996 0.198357  
 N9 -1.948532 2.077257 -0.378253  
 H10 -1.570041 2.980908 -0.106710  
 H11 -1.873791 2.008593 -1.391447  
 C12 -1.618856 -0.271593 -0.175015  
 H13 -1.486742 -0.405110 -1.257215  
 H14 -0.989752 -1.007297 0.334066  
 C15 -3.077816 -0.557168 0.179520  
 H16 -3.745158 0.102422 -0.385656  
 H17 -3.237720 -0.370027 1.251766  
 O18 -3.274411 -1.916507 -0.145746  
 H19 -4.202649 -2.146645 -0.052279  
 H20 -1.198433 1.149172 1.207371  
 N21 3.910333 -0.416223 -0.054861  
 H22 4.348578 -0.781211 0.782886  
 H23 4.525385 -0.595476 -0.846126  
 H24 1.644373 -0.602499 1.360865  
 H25 2.690451 -1.948563 -0.652105  
 H26 2.256102 1.555638 0.290192  
 O27 1.057246 0.146925 1.609351

#### [HOCH<sub>2</sub>CH<sub>2</sub>NH(NH<sub>2</sub>)CH<sub>2</sub>CH<sub>2</sub>NHNH<sub>2</sub>]<sup>+</sup>·H<sub>2</sub>O

N1 -2.376905 0.555190 -0.719462  
 C2 -1.525251 -0.526874 -1.230549  
 C3 -0.784157 -1.254303 -0.112748  
 H4 -0.416817 -2.222147 -0.464171  
 H5 -0.445111 2.783615 1.020949  
 H6 -0.843994 -0.096513 -1.970438  
 H7 -2.120501 -1.290034 -1.750348  
 N8 0.405197 -0.523244 0.454864  
 N9 0.830119 -1.019471 1.732000  
 H10 0.108283 -0.797381 2.413031  
 H11 0.929080 -2.030678 1.670606  
 C12 1.576492 -0.502728 -0.468564

H13 1.896510 -1.534900 -0.635374  
 H14 1.242724 -0.083305 -1.419115  
 C15 2.716695 0.356641 0.067302  
 H16 3.231165 -0.154550 0.886398  
 H17 2.315608 1.305046 0.455607  
 O18 3.548682 0.560723 -1.049202  
 H19 4.402687 0.902523 -0.770465  
 H20 0.126380 0.477194 0.642455  
 N21 -3.395769 0.018289 0.119536  
 H22 -3.692002 0.726408 0.780931  
 H23 -4.203716 -0.293877 -0.414177  
 H24 -1.400483 1.706553 0.319865  
 H25 -2.769199 1.059515 -1.512957  
 H26 -1.483009 -1.412744 0.712049  
 O27 -0.676029 1.852215 0.973443

**[HOCH<sub>2</sub>CH<sub>2</sub>NH(NH<sub>2</sub>)CH<sub>2</sub>CH<sub>2</sub>NHNH<sub>2</sub>]<sup>+</sup>**

N1 -1.924314 -0.940644 -0.628201  
 C2 -1.753115 -0.984426 0.820472  
 C3 -0.979434 0.267026 1.253422  
 H4 -0.511861 0.152305 2.232466  
 H5 -1.200725 -1.898762 1.056089  
 H6 -2.699096 -1.011044 1.377144  
 N7 0.081611 0.530905 0.218509  
 N8 0.256372 1.894812 -0.180952  
 H9 -0.641141 2.226537 -0.529014  
 H10 0.511858 2.437737 0.641432  
 C11 1.398731 -0.080699 0.560051  
 H12 1.795096 0.436508 1.437815  
 H13 1.207648 -1.123292 0.825665  
 C14 2.378824 -0.034888 -0.606956  
 H15 2.737498 0.986270 -0.769606  
 H16 1.878195 -0.373042 -1.527607  
 O17 3.406821 -0.912443 -0.220772  
 H18 4.168299 -0.811618 -0.798818  
 H19 -0.293440 0.024763 -0.614177  
 N20 -2.728656 0.174945 -1.009297  
 H21 -2.639445 0.302695 -2.011784  
 H22 -3.714486 0.020087 -0.799015  
 H23 -2.281671 -1.827730 -0.974881  
 H24 -1.636421 1.135923 1.258125

**TS2**

N1 -1.692205 -1.126726 -0.262268  
 C2 -1.547276 -0.592444 1.090722  
 C3 -0.951747 0.810613 1.006154  
 H4 -0.565611 1.155793 1.966084  
 H5 -0.882378 -1.261401 1.642136  
 H6 -2.499700 -0.526402 1.634585  
 N7 0.170176 0.791739 0.009414

N8 0.372435 2.023335 -0.718242  
 H9 -0.525150 2.327865 -1.092676  
 H10 0.703010 2.717979 -0.051551  
 C11 1.420042 0.278741 0.607950  
 H12 1.692231 0.889224 1.466413  
 H13 1.706221 -1.361473 0.537171  
 C14 2.483982 -0.011574 -0.356965  
 H15 3.492556 0.291260 -0.090116  
 H16 2.275031 0.139369 -1.416537  
 O17 2.538740 -1.592233 -0.125095  
 H18 2.349463 -2.158023 -0.892580  
 H19 -0.156679 0.095831 -0.681720  
 N20 -2.644430 -0.363090 -1.000743  
 H21 -2.536825 -0.575870 -1.986005  
 H22 -3.602128 -0.583195 -0.729687  
 H23 -1.934445 -2.113991 -0.220557  
 H24 -1.697343 1.512086 0.631506

**[CH<sub>2</sub>CHNH(NH<sub>2</sub>)CH<sub>2</sub>CH<sub>2</sub>NHNH<sub>2</sub>]<sup>+</sup>**

N1 -1.558579 -0.769727 -0.464506  
 C2 -1.107959 -0.860263 0.921459  
 C3 -0.179256 0.322429 1.204465  
 H4 0.438775 0.167755 2.090131  
 H5 -0.579419 -1.811518 1.032925  
 H6 -1.923832 -0.837034 1.655797  
 N7 0.710384 0.492468 -0.003573  
 N8 1.004318 1.841526 -0.399105  
 H9 0.113201 2.309702 -0.554693  
 H10 1.487353 2.302159 0.369435  
 C11 1.950200 -0.282158 0.094931  
 H12 2.644109 0.108040 0.831865  
 C13 2.152903 -1.354243 -0.651648  
 H14 3.074805 -1.913855 -0.547716  
 H15 1.428879 -1.702105 -1.382622  
 H16 0.133342 0.072750 -0.764482  
 N17 -2.331081 0.411808 -0.670546  
 H18 -2.419715 0.565308 -1.669301  
 H19 -3.268792 0.325093 -0.279708  
 H20 -2.049081 -1.618618 -0.736284  
 H21 -0.750242 1.245212 1.303521

**Cartesian coordinates for structures  
 in Figure S4, calculated at ωB97XD/  
 6-31+G(d,p)**

**[(HE)<sub>2</sub> + H]<sup>+</sup>**

O1 -2.085492 -1.439869 -0.825220  
 C2 -2.746950 -0.188849 -0.809156  
 C3 -2.322517 0.497570 0.475819  
 N4 -0.842348 0.479701 0.568422

N5 -0.358036 1.214926 1.704249  
 H6 -2.424130 -1.993178 -1.534644  
 H7 -3.837279 -0.294666 -0.803188  
 H8 -2.462722 0.419097 -1.679388  
 H9 -2.713855 -0.033761 1.346803  
 H10 -2.645683 1.539156 0.511056  
 H11 -0.416173 0.961077 -0.260868  
 H12 -0.480002 -0.491371 0.564841  
 H13 -0.676331 0.729652 2.540380  
 H14 0.658704 1.116776 1.652618  
 N15 1.029514 1.810851 -1.045303  
 H16 1.351434 1.970206 -2.001242  
 H17 0.998046 2.714630 -0.579895  
 N18 1.921122 0.967849 -0.301135  
 H19 2.852323 1.376536 -0.264782  
 C20 1.993439 -0.372952 -0.894712  
 C21 2.241405 -1.432810 0.161945  
 H22 1.033767 -0.580668 -1.380274  
 H23 2.767037 -0.446213 -1.671270  
 H24 2.401136 -2.396464 -0.333871  
 H25 3.133202 -1.189893 0.752880  
 O26 1.093972 -1.493242 1.009789  
 H27 1.148661 -2.267080 1.577274

**TS1**

C1 2.712564 0.434629 0.794381  
 C2 1.625954 -0.162533 0.035676  
 N3 1.098918 0.473796 -1.140799  
 N4 0.317094 1.662188 -0.848132  
 H5 3.146955 1.376494 0.454592  
 H6 2.736910 0.319298 1.874601  
 H7 2.947878 -1.010738 -0.197115  
 H8 1.836551 0.711525 -1.798313  
 H9 0.873552 2.384329 -0.383814  
 H10 -0.003834 2.049697 -1.733843  
 N11 -2.539118 1.595080 1.078493  
 H12 -2.832978 2.238518 0.349134  
 H13 -3.366289 1.203975 1.521671  
 N14 -1.787775 0.543749 0.474257  
 H15 -0.928850 1.019646 -0.002505  
 C16 -2.488647 -0.346666 -0.496653  
 C17 -1.614566 -1.563684 -0.748748  
 H18 -3.440671 -0.642155 -0.047846  
 H19 -2.674331 0.217629 -1.413239  
 H20 -2.170903 -2.270970 -1.373159  
 H21 -0.689114 -1.269770 -1.260581  
 O22 -1.344814 -2.091603 0.541160  
 H23 -0.766373 -2.857077 0.479076  
 H24 -1.416323 -0.051094 1.222571  
 O25 3.869065 -0.708898 0.379858

H26 4.641885 -0.408984 -0.127524  
 H27 0.876258 -0.700483 0.613486

**[CH<sub>2</sub>CHNHNH<sub>2</sub>][NH<sub>2</sub>NH<sub>2</sub>CH<sub>2</sub>CH<sub>2</sub>OH]<sup>+</sup>·H<sub>2</sub>O**

C1 2.966649 -1.094683 -0.735792  
 C2 1.672837 -1.052843 -0.404374  
 N3 1.123311 -1.593985 0.765411  
 N4 -0.178649 -2.149381 0.593966  
 H5 3.700420 -1.639271 -0.148727  
 H6 3.310154 -0.598624 -1.635817  
 H7 3.025422 2.860862 -0.064519  
 H8 1.758100 -2.232297 1.236701  
 H9 -0.143806 -3.032672 0.080778  
 H10 -0.543014 -2.350470 1.521573  
 N11 -3.095399 -0.753469 -0.946675  
 H12 -3.596747 -1.198779 -0.183259  
 H13 -3.687586 -0.030055 -1.346057  
 N14 -1.916116 -0.147434 -0.421224  
 H15 -1.275352 -0.929817 -0.089413  
 C16 -2.052723 0.883883 0.651110  
 C17 -0.676995 1.510297 0.836666  
 H18 -2.778601 1.621985 0.300853  
 H19 -2.424300 0.402456 1.558088  
 H20 -0.769954 2.396447 1.474057  
 H21 0.006398 0.800995 1.323996  
 O22 -0.235853 1.829078 -0.464910  
 H23 0.709330 2.079677 -0.423295  
 H24 -1.408565 0.314640 -1.187649  
 O25 2.396719 2.141524 0.040953  
 H26 2.883824 1.311413 -0.034526  
 H27 0.956708 -0.511353 -1.017134

**[CH<sub>2</sub>CHNHNH<sub>2</sub>][NH<sub>2</sub>NH<sub>2</sub>CH<sub>2</sub>CH<sub>2</sub>OH]<sup>+</sup>**

C1 -3.336882 -0.549841 -0.645794  
 C2 -2.111831 -0.110760 -0.361606  
 N3 -1.782321 0.689666 0.752298  
 N4 -0.858678 1.735221 0.433553  
 H5 -4.208323 -0.256388 -0.067490  
 H6 -3.490893 -1.242478 -1.463753  
 H7 -2.615321 1.052490 1.209148  
 H8 -1.279218 2.434153 -0.183574  
 H9 -0.621557 2.202517 1.305172  
 N10 2.370343 1.511453 -0.872163  
 H11 2.572430 2.134341 -0.095177  
 H12 3.238801 1.084864 -1.184274  
 N13 1.483696 0.490472 -0.416650  
 H14 0.567257 0.982455 -0.137263  
 C15 1.947699 -0.405252 0.685524  
 C16 0.940288 -1.535053 0.832694  
 H17 2.929662 -0.792333 0.402134

H18 2.034809 0.185860 1.599638  
 H19 1.346621 -2.282425 1.522048  
 H20 -0.009275 -1.156362 1.233132  
 O21 0.777201 -2.048765 -0.479145  
 H22 0.191856 -2.811836 -0.479506  
 H23 1.252088 -0.108982 -1.216752  
 H24 -1.253469 -0.418001 -0.954496

**TS2**

C1 2.084884 1.600421 -1.232860  
 C2 2.106377 0.416067 -0.620687  
 N3 1.944223 0.255247 0.778091  
 N4 1.725452 -1.101095 1.157204  
 H5 1.939786 2.527946 -0.686215  
 H6 2.269380 1.665268 -2.298204  
 H7 2.687811 0.699685 1.308115  
 H8 2.578887 -1.659030 1.104324  
 H9 1.410300 -1.107697 2.122584  
 N10 -1.085115 -2.194366 -1.116851  
 H11 -1.192583 -2.952710 -0.447932  
 H12 -2.012278 -1.975074 -1.476980  
 N13 -0.644562 -1.039780 -0.387950  
 H14 0.224872 -1.317359 0.140603  
 C15 -1.650831 -0.389471 0.487694  
 C16 -1.376537 1.013568 0.798540  
 H17 -2.795918 0.582432 -0.208643  
 H18 -1.883658 -1.043607 1.324771  
 H19 -1.592744 1.334488 1.815605  
 H20 -0.481051 1.486789 0.397728  
 O21 -2.556674 1.644055 -0.099092  
 H22 -3.212009 2.199114 0.358513  
 H23 -0.311844 -0.370563 -1.087804  
 H24 2.261087 -0.505670 -1.183301

**[CH<sub>2</sub>CHNHNH<sub>2</sub>][NH<sub>2</sub>NH<sub>2</sub>CHCH<sub>2</sub>]<sup>+</sup>**

C1 -2.306704 1.642000 0.308788  
 C2 -1.961539 0.355007 0.348262  
 N3 -1.759486 -0.423018 -0.822987  
 N4 -1.026757 -1.621340 -0.570145  
 H5 -2.443217 2.166806 -0.631981  
 H6 -2.511595 2.175905 1.228987  
 H7 -2.620006 -0.593915 -1.334003  
 H8 -1.575234 -2.314062 -0.056094  
 H9 -0.777861 -2.027174 -1.468586  
 N10 1.259414 -0.404116 1.786098  
 H11 1.592408 -1.361263 1.866380  
 H12 1.984036 0.222834 2.127962  
 N13 1.032085 -0.121825 0.397432  
 H14 0.318751 -0.864054 0.048679  
 C15 2.207369 -0.053650 -0.465420

C16 2.517453 1.048806 -1.130152  
 H17 2.770049 -0.980276 -0.498561  
 H18 3.390117 1.066077 -1.772385  
 H19 1.923353 1.956776 -1.068472  
 H20 0.496724 0.754322 0.357167  
 H21 -1.823794 -0.162853 1.299247

**[HE + H]<sup>+</sup>**

O1 1.353141 -0.806526 -0.426858  
 C2 1.223684 0.234158 0.526470  
 C3 0.084362 1.102238 0.008007  
 N4 -0.990024 0.202679 -0.535109  
 N5 -1.626194 -0.558328 0.504662  
 H6 2.172580 -1.296881 -0.310192  
 H7 2.124798 0.850458 0.599256  
 H8 0.995926 -0.164393 1.522043  
 H9 0.409620 1.716766 -0.834684  
 H10 -0.363482 1.720944 0.785656  
 H11 -0.542720 -0.392386 -1.248824  
 H12 -1.706814 0.777787 -0.982576  
 H13 -2.465640 -0.986219 0.120515  
 H14 -0.984150 -1.302694 0.769940

**CH<sub>2</sub>CHNHNH<sub>2</sub>**

N1 -1.755825 -0.052331 0.174844  
 H2 -1.671786 -0.632683 1.005352  
 H3 -2.183407 -0.584515 -0.573705  
 N4 -0.507208 0.441293 -0.250666  
 H5 -0.379821 1.397234 0.051986  
 C6 0.617627 -0.368522 -0.132054  
 C7 1.863769 0.048432 0.122950  
 H8 0.409324 -1.419744 -0.323961  
 H9 2.091764 1.092294 0.319134  
 H10 2.686776 -0.654785 0.106578

**Cartesian coordinates for structures  
in Figure S5, calculated at  $\omega$ B97XD/  
6-31+G(d,p)****[(HE)<sub>2</sub> + H]<sup>+</sup>**

O1 -2.085492 -1.439869 -0.825220  
 C2 -2.746950 -0.188849 -0.809156  
 C3 -2.322517 0.497570 0.475819  
 N4 -0.842348 0.479701 0.568422  
 N5 -0.358036 1.214926 1.704249  
 H6 -2.424130 -1.993178 -1.534644  
 H7 -3.837279 -0.294666 -0.803188  
 H8 -2.462722 0.419097 -1.679388  
 H9 -2.713855 -0.033761 1.346803  
 H10 -2.645683 1.539156 0.511056



H11 -0.416173 0.961077 -0.260868  
 H12 -0.480002 -0.491371 0.564841  
 H13 -0.676331 0.729652 2.540380  
 H14 0.658704 1.116776 1.652618  
 N15 1.029514 1.810851 -1.045303  
 H16 1.351434 1.970206 -2.001242  
 H17 0.998046 2.714630 -0.579895  
 N18 1.921122 0.967849 -0.301135  
 H19 2.852323 1.376536 -0.264782  
 C20 1.993439 -0.372952 -0.894712  
 C21 2.241405 -1.432810 0.161945  
 H22 1.033767 -0.580668 -1.380274  
 H23 2.767037 -0.446213 -1.671270  
 H24 2.401136 -2.396464 -0.333871  
 H25 3.133202 -1.189893 0.752880  
 O26 1.093972 -1.493242 1.009789  
 H27 1.148661 -2.267080 1.577274

**TS1**

N1 -0.078724 -1.039014 1.285532  
 N2 0.818902 -0.650958 0.249946  
 C3 2.233101 -0.673067 0.636438  
 C4 3.055698 0.010851 -0.437617  
 H5 4.111633 -0.010378 -0.144456  
 H6 2.945877 -0.520331 -1.392412  
 O7 2.573143 1.343233 -0.545933  
 H8 3.144881 1.846754 -1.131453  
 H9 2.562597 -1.710821 0.751430  
 H10 2.387066 -0.152530 1.593938  
 H11 -0.086119 -1.607048 -0.862526  
 H12 0.542954 0.308189 0.011140  
 H13 0.025588 -2.036332 1.454851  
 H14 0.113068 -0.544718 2.159142  
 O15 -0.947058 -2.057192 -1.085128  
 C16 -2.498737 -0.816053 0.196261  
 H17 -2.926500 -1.681909 -0.290878  
 H18 -2.352398 -0.845312 1.267246  
 C19 -2.538397 0.480606 -0.476177  
 H20 -2.109700 0.412986 -1.487144  
 H21 -3.633433 0.571069 -0.646145  
 N22 -2.102816 1.602145 0.319322  
 N23 -0.726970 1.889512 0.122593  
 H24 -0.566071 2.513022 -0.666839  
 H25 -0.372014 2.341467 0.958411  
 H26 -0.984152 -2.208871 -2.034706  
 H27 -2.694682 2.410620 0.153714

**[HOCH<sub>2</sub>CH<sub>2</sub>NHNH<sub>2</sub>CH<sub>2</sub>CH<sub>2</sub>NHNH<sub>2</sub>]<sup>+</sup>·H<sub>2</sub>O**

O1 -1.982147 2.389763 -0.555460  
 C2 -0.534115 0.132705 0.738569

C3 -1.599759 -0.787719 0.148946  
 H4 -2.438283 3.114396 -0.989367  
 H5 -0.707053 0.320956 1.802770  
 H6 -1.518140 -1.799403 0.588564  
 N7 0.822449 -0.488639 0.653189  
 H8 1.533487 0.157260 1.060957  
 H9 0.860518 -1.360670 1.197838  
 N10 1.266626 -0.672672 -0.705608  
 H11 0.739896 -1.446476 -1.100939  
 C12 2.713060 -0.924185 -0.761944  
 C13 3.494546 0.342578 -0.462754  
 H14 3.027593 -1.731804 -0.083475  
 H15 2.924501 -1.241785 -1.785251  
 H16 4.566629 0.141119 -0.548314  
 H17 3.208829 1.131141 -1.166108  
 O18 3.163777 0.726560 0.878421  
 H19 3.607137 1.544553 1.123917  
 H20 -1.472889 -0.877334 -0.932830  
 N21 -2.915731 -0.196908 0.350222  
 H22 -3.134986 -0.134850 1.343192  
 N23 -3.894186 -0.940298 -0.361408  
 H24 -4.288043 -1.694353 0.195175  
 H25 -4.637694 -0.317130 -0.651434  
 H26 -2.630791 1.689171 -0.374104  
 H27 -0.490253 1.083968 0.204062

**[HOCH<sub>2</sub>CH<sub>2</sub>NHNH<sub>2</sub>CH<sub>2</sub>CH<sub>2</sub>NHNH<sub>2</sub>]<sup>+</sup>**

C1 0.793598 -0.830484 0.009554  
 C2 1.932164 0.140869 0.307959  
 H3 0.964287 -1.804487 0.477258  
 H4 1.925259 0.419103 1.380168  
 N5 -0.511630 -0.339223 0.551165  
 H6 -1.272222 -1.022325 0.345386  
 H7 -0.460764 -0.245174 1.574660  
 N8 -0.955121 0.874261 -0.088801  
 H9 -0.351104 1.627170 0.229644  
 C10 -2.364773 1.151578 0.221981  
 C11 -3.281681 0.200764 -0.525890  
 H12 -2.571576 1.108346 1.301999  
 H13 -2.554355 2.172539 -0.116444  
 H14 -4.324318 0.438037 -0.293630  
 H15 -3.114184 0.290092 -1.603996  
 O16 -2.959446 -1.122831 -0.079504  
 H17 -3.518179 -1.779651 -0.506299  
 H18 1.818615 1.057110 -0.276597  
 N19 3.167325 -0.466094 -0.138855  
 H20 3.488753 -1.185206 0.503745  
 N21 4.159995 0.505537 -0.407948  
 H22 4.767750 0.678228 0.388172  
 H23 4.716714 0.194072 -1.194416

H24 0.661068 -0.962936 -1.064167

### TS2

C1 -0.601876 0.567434 -0.308324  
 C2 -1.859838 -0.020643 0.339977  
 H3 -0.592883 1.659193 -0.211690  
 H4 -1.826245 0.142518 1.434006  
 N5 0.642661 0.084868 0.285738  
 H6 2.401363 2.313511 0.037822  
 H7 0.763818 0.413652 1.246198  
 N8 0.817957 -1.325001 0.169250  
 H9 0.373464 -1.845821 0.921660  
 C10 2.251043 -1.463845 0.125265  
 C11 2.676632 -0.424289 -0.811187  
 H12 2.765667 -1.328267 1.091101  
 H13 2.599191 -2.434150 -0.277699  
 H14 3.722751 -0.155372 -0.888985  
 H15 2.024698 -0.147624 -1.632812  
 O16 3.064308 1.662875 0.293271  
 H17 3.898886 2.141305 0.369166  
 H18 -1.897386 -1.098881 0.165282  
 N19 -3.032482 0.538747 -0.301268  
 H20 -3.164516 1.513585 -0.043101  
 N21 -4.184587 -0.242520 -0.039668  
 H22 -4.690771 0.065624 0.786443  
 H23 -4.797631 -0.201596 -0.844377  
 H24 -0.595483 0.314729 -1.371923

### *cyclo*-[CH<sub>2</sub>CH<sub>2</sub>NHNH<sup>+</sup>(CH<sub>2</sub>CH<sub>2</sub>NHNH<sub>2</sub>)]

C1 -0.169079 0.742094 -0.152305  
 C2 -1.318026 -0.103038 0.392871  
 H3 -0.255421 1.796089 0.131355  
 H4 -1.276137 -0.142708 1.498189  
 N5 1.133634 0.266051 0.389233  
 H6 1.117644 0.322996 1.414531  
 N7 1.550982 -1.045456 -0.089451  
 H8 1.356462 -1.777129 0.591313  
 C9 2.959925 -0.590921 -0.218882  
 C10 2.428421 0.847742 -0.148511  
 H11 3.598719 -0.857732 0.627827  
 H12 3.420511 -0.901849 -1.154916  
 H13 2.894295 1.552971 0.537091  
 H14 2.233287 1.306748 -1.116984  
 H15 -1.230176 -1.125335 0.016498  
 N16 -2.557010 0.426190 -0.134757  
 H17 -2.868010 1.246472 0.378074  
 N18 -3.557409 -0.569676 -0.230321  
 H19 -4.159942 -0.601216 0.587509  
 H20 -4.118145 -0.390869 -1.054364  
 H21 -0.111913 0.656541 -1.238093

### TS3

C1 1.973957 -1.258387 -0.555326  
 C2 1.532430 -0.057588 -1.124933  
 N3 1.815696 1.222175 -0.521369  
 N4 2.080327 1.127756 0.870206  
 H5 2.640776 -1.301029 0.296382  
 H6 1.831954 -2.183661 -1.103483  
 H7 1.446713 -0.008713 -2.210285  
 H8 2.533175 1.730204 -1.029738  
 H9 3.071596 0.992922 1.066413  
 H10 1.805352 2.005593 1.298150  
 N11 0.276552 -1.501547 0.821148  
 H12 0.652917 -0.969330 1.603202  
 H13 -0.041733 -2.424403 1.099744  
 N14 -0.669119 -0.754253 0.134448  
 H15 0.310290 -0.263690 -0.823803  
 C16 -1.362235 0.325420 0.862856  
 C17 -2.354454 0.953470 -0.098796  
 H18 -1.883686 -0.089319 1.732140  
 H19 -0.616797 1.053922 1.187478  
 H20 -2.963233 1.683787 0.445099  
 H21 -1.822173 1.467666 -0.909712  
 O22 -3.131988 -0.122050 -0.595555  
 H23 -3.818978 0.196399 -1.187689  
 H24 -1.352652 -1.350353 -0.333299

### [HE + H]<sup>+</sup>

O1 1.353141 -0.806526 -0.426858  
 C2 1.223684 0.234158 0.526470  
 C3 0.084362 1.102238 0.008007  
 N4 -0.990024 0.202679 -0.535109  
 N5 -1.626194 -0.558328 0.504662  
 H6 2.172580 -1.296881 -0.310192  
 H7 2.124798 0.850458 0.599256  
 H8 0.995926 -0.164393 1.522043  
 H9 0.409620 1.716766 -0.834684  
 H10 -0.363482 1.720944 0.785656  
 H11 -0.542720 -0.392386 -1.248824  
 H12 -1.706814 0.777787 -0.982576  
 H13 -2.465640 -0.986219 0.120515  
 H14 -0.984150 -1.302694 0.769940

### CH<sub>2</sub>CHNHNH<sub>2</sub>

N1 -1.755825 -0.052331 0.174844  
 H2 -1.671786 -0.632683 1.005352  
 H3 -2.183407 -0.584515 -0.573705  
 N4 -0.507208 0.441293 -0.250666  
 H5 -0.379821 1.397234 0.051986  
 C6 0.617627 -0.368522 -0.132054  
 C7 1.863769 0.048432 0.122950

H8 0.409324 -1.419744 -0.323961  
 H9 2.091764 1.092294 0.319134  
 H10 2.686776 -0.654785 0.106578

**Cartesian coordinates for structures  
 in Figure S6, calculated at B97XD/  
 6-31+G(d,p)**

**[(HEHN)<sub>2</sub>(HE)<sub>2</sub> + H]<sup>+</sup>**

**Conformer\_1**

O1 3.568984 -0.975171 -1.965970  
 C2 3.496172 -2.360423 -1.687022  
 C3 3.679304 -2.660052 -0.204183  
 N4 2.672322 -1.952436 0.638092  
 N5 2.658179 -2.493671 1.969685  
 H6 2.659268 -0.630657 -2.053051  
 H7 4.301232 -2.866474 -2.227301  
 H8 2.542946 -2.769308 -2.039013  
 H9 4.662913 -2.338672 0.147721  
 H10 3.560014 -3.726127 -0.003075  
 H11 1.730336 -2.057533 0.224535  
 H12 2.871370 -0.931334 0.639488  
 H13 1.777908 -2.183016 2.386251  
 H14 3.428922 -2.060279 2.472265  
 N15 0.102761 -0.532871 -1.332641  
 O16 0.284356 -1.722249 -0.955462  
 O17 1.045478 0.105977 -1.842463  
 O18 -1.011559 0.001960 -1.188293  
 O19 -4.643758 -0.988175 -1.677755  
 C20 -4.972050 -2.004338 -0.734110  
 C21 -4.338558 -1.606230 0.581942  
 N22 -2.863508 -1.499653 0.440738  
 N23 -2.253483 -2.781521 0.208168  
 H24 -4.850362 -1.280648 -2.569510  
 H25 -4.578712 -2.972290 -1.059562  
 H26 -6.055813 -2.078036 -0.594498  
 H27 -4.548829 -2.349926 1.352849  
 H28 -4.693130 -0.627610 0.913160  
 H29 -2.443404 -0.992635 1.248492  
 H30 -2.622737 -0.893959 -0.361409  
 H31 -1.353531 -2.580707 -0.238451  
 H32 -2.041825 -3.169902 1.124584  
 N33 -0.191270 -0.452242 1.943629  
 O34 0.822668 0.180592 1.601693  
 O35 -1.310814 0.142814 1.999881  
 O36 -0.138503 -1.663389 2.216026  
 O37 -3.636201 1.241534 -0.350284  
 C38 -3.169051 2.475129 -0.861403  
 C39 -2.460204 3.212735 0.255356  
 N40 -1.174842 2.558557 0.598294

N41 -0.520664 3.240596 1.682207  
 H42 -4.085936 0.739957 -1.048141  
 H43 -4.002255 3.101035 -1.203120  
 H44 -2.484553 2.313287 -1.705362  
 H45 -3.078780 3.232482 1.155564  
 H46 -2.226208 4.239799 -0.030788  
 H47 -0.505567 2.628421 -0.223386  
 H48 -1.313070 1.558730 0.832484  
 H49 -0.786770 2.760408 2.538624  
 H50 0.481898 3.094657 1.540989  
 N51 0.962582 2.968855 -1.090690  
 H52 1.108645 3.962287 -1.246628  
 H53 1.088542 2.470325 -1.974392  
 N54 1.905997 2.534200 -0.107796  
 H55 1.678880 1.561674 0.090901  
 C56 3.296280 2.625211 -0.547535  
 C57 4.206858 1.855936 0.397228  
 H58 3.423896 2.235196 -1.572746  
 H59 3.594797 3.679822 -0.555920  
 H60 5.253016 2.093215 0.174245  
 H61 4.003535 2.135111 1.433640  
 O62 3.998748 0.451324 0.310722  
 H63 4.149139 0.144455 -0.603631

**Conformer\_2**

N1 -1.470219 3.404237 -1.322582  
 H2 -1.596644 4.172478 -0.667839  
 H3 -1.431602 3.821613 -2.253819  
 N4 -0.238586 2.750075 -1.000659  
 H5 -0.161615 1.960365 -1.645851  
 C6 0.950737 3.604665 -1.049439  
 C7 2.215259 2.758690 -0.940526  
 H8 1.001497 4.183875 -1.984480  
 H9 0.894683 4.311498 -0.213703  
 H10 2.349649 2.162993 -1.849961  
 H11 3.077507 3.419582 -0.828342  
 O12 2.193037 1.893861 0.193815  
 H13 1.757097 1.066059 -0.065582  
 O14 4.338023 0.201533 0.924281  
 C15 4.703465 -0.292188 -0.344791  
 C16 4.434816 -1.789901 -0.368098  
 N17 3.005996 -2.023395 -0.046445  
 N18 2.666896 -3.417557 -0.026783  
 H19 3.756782 0.970138 0.817090  
 H20 5.770022 -0.128133 -0.535505  
 H21 4.137616 0.200649 -1.146278  
 H22 5.029623 -2.294747 0.397449  
 H23 4.636452 -2.240782 -1.341062  
 H24 2.413873 -1.565164 -0.766984  
 H25 2.751917 -1.525028 0.824563

|                    |           |           |           |     |           |           |           |
|--------------------|-----------|-----------|-----------|-----|-----------|-----------|-----------|
| H26                | 3.172258  | -3.833029 | 0.753312  | H11 | 2.213412  | -1.689718 | -0.658202 |
| H27                | 1.676065  | -3.446681 | 0.216841  | H12 | 0.833274  | -1.311211 | 0.193384  |
| O28                | -3.240329 | -1.719810 | 1.432493  | H13 | 0.387703  | -2.258637 | -1.878453 |
| C29                | -3.182456 | -2.877276 | 0.632317  | H14 | -0.219123 | -3.142768 | -0.646720 |
| C30                | -3.670626 | -2.516164 | -0.760644 | N15 | -0.351816 | 0.211106  | -2.198545 |
| N31                | -2.816208 | -1.438856 | -1.321393 | O16 | -0.988090 | 1.261968  | -1.952582 |
| N32                | -3.242117 | -1.053285 | -2.638257 | O17 | 0.879324  | 0.154641  | -2.043335 |
| H33                | -2.400112 | -1.606673 | 1.909413  | O18 | -0.981388 | -0.810407 | -2.576718 |
| H34                | -3.836287 | -3.662152 | 1.030159  | O19 | -2.810951 | 2.172512  | 0.918452  |
| H35                | -2.161243 | -3.277608 | 0.589809  | C20 | -2.192640 | 3.373560  | 1.341941  |
| H36                | -4.691991 | -2.131977 | -0.741782 | C21 | -0.706936 | 3.166438  | 1.588459  |
| H37                | -3.619213 | -3.376167 | -1.434110 | N22 | -0.026568 | 2.651414  | 0.374899  |
| H38                | -1.811708 | -1.714779 | -1.311761 | N23 | 0.123042  | 3.661447  | -0.639585 |
| H39                | -2.892734 | -0.583954 | -0.732286 | H24 | -2.711927 | 1.481243  | 1.593486  |
| H40                | -2.550388 | -0.374188 | -2.953527 | H25 | -2.654536 | 3.764601  | 2.255463  |
| H41                | -3.146918 | -1.872434 | -3.235131 | H26 | -2.340966 | 4.103236  | 0.543052  |
| O42                | -2.751533 | 1.145511  | -0.167053 | H27 | -0.542399 | 2.423990  | 2.376957  |
| C43                | -3.179431 | 1.519767  | 1.131607  | H28 | -0.217988 | 4.100538  | 1.871250  |
| C44                | -2.155641 | 2.398541  | 1.853787  | H29 | -0.568631 | 1.864113  | -0.010862 |
| N45                | -0.783149 | 1.888996  | 1.623946  | H30 | 0.934453  | 2.257244  | 0.642033  |
| N46                | 0.196079  | 2.664972  | 2.331094  | H31 | -0.196836 | 3.232730  | -1.506780 |
| H47                | -2.579817 | 1.934140  | -0.724411 | H32 | 1.124759  | 3.816741  | -0.746059 |
| H48                | -3.335031 | 0.582707  | 1.667956  | N33 | -1.032399 | -0.566284 | 1.831174  |
| H49                | -4.135351 | 2.054944  | 1.100450  | O34 | -0.351136 | -1.225963 | 2.627107  |
| H50                | -2.353307 | 2.399655  | 2.928804  | O35 | -0.517072 | -0.149701 | 0.748782  |
| H51                | -2.166772 | 3.435483  | 1.510998  | O36 | -2.231790 | -0.313079 | 2.063169  |
| H52                | -0.557360 | 2.030883  | 0.599635  | O37 | -2.063615 | -2.831626 | 0.342468  |
| H53                | -0.737508 | 0.870764  | 1.858228  | C38 | -3.162473 | -2.847836 | -0.554904 |
| H54                | 0.206333  | 2.342949  | 3.295919  | C39 | -3.972647 | -1.558774 | -0.544877 |
| H55                | 1.094619  | 2.425981  | 1.905440  | N40 | -3.131148 | -0.390753 | -0.918504 |
| N56                | 0.326324  | -0.626368 | -1.799515 | N41 | -3.928897 | 0.719004  | -1.369617 |
| O57                | 1.510731  | -0.242400 | -1.624413 | H42 | -2.373780 | -2.937484 | 1.248509  |
| O58                | -0.006126 | -1.777097 | -1.444150 | H43 | -3.839148 | -3.683005 | -0.344196 |
| O59                | -0.505466 | 0.147274  | -2.311053 | H44 | -2.734674 | -3.011753 | -1.548667 |
| N60                | 0.199679  | -1.300303 | 1.785274  | H45 | -4.407096 | -1.355075 | 0.436811  |
| O61                | 1.147706  | -0.539742 | 1.473843  | H46 | -4.773755 | -1.609881 | -1.284611 |
| O62                | 0.252476  | -2.516103 | 1.598824  | H47 | -2.481641 | -0.645279 | -1.695229 |
| O63                | -0.834769 | -0.779236 | 2.299450  | H48 | -2.508613 | -0.136133 | -0.135008 |
| <b>Conformer_3</b> |           |           |           | H49 | -3.299333 | 1.269470  | -1.952812 |
| O1                 | 2.424804  | -0.874907 | 2.083098  | H50 | -4.109894 | 1.297546  | -0.549358 |
| C2                 | 2.853311  | -2.196188 | 1.814356  | H51 | 3.758811  | -0.836573 | -2.209683 |
| C3                 | 1.853609  | -2.956281 | 0.951335  | H52 | 4.978369  | 2.115861  | -0.458891 |
| N4                 | 1.392548  | -2.104593 | -0.174876 | H53 | 5.622446  | -0.197526 | -0.902945 |
| N5                 | 0.650761  | -2.892935 | -1.121867 | C54 | 4.249806  | 1.468532  | -0.962068 |
| H6                 | 1.537896  | -0.906365 | 2.482369  | H55 | 4.372623  | 1.638571  | -2.038032 |
| H7                 | 3.023089  | -2.760251 | 2.738479  | H56 | 2.211591  | 1.391023  | -1.150847 |
| H8                 | 3.810312  | -2.111921 | 1.293484  | N57 | 2.552031  | 1.814894  | 0.756758  |
| H9                 | 0.963716  | -3.238011 | 1.519093  | H58 | 2.707439  | 0.883026  | 1.155619  |
| H10                | 2.301207  | -3.851699 | 0.516915  | N59 | 2.904932  | 1.922773  | -0.625664 |
|                    |           |           |           | C60 | 4.584202  | 0.017032  | -0.625229 |

O61 3.702587 -0.915712 -1.251641  
H62 3.107307 2.487296 1.278783  
H63 4.485757 -0.167161 0.447973

#### Conformer\_4

N1 -1.296654 3.613423 -1.327330  
H2 -1.451403 4.361986 -0.656135  
H3 -1.212207 4.057318 -2.242990  
N4 -0.083623 2.948006 -0.964500  
H5 0.027633 2.162526 -1.608020  
C6 1.095873 3.818098 -0.916391  
C7 2.381013 3.006288 -0.786203  
H8 1.174394 4.447549 -1.816243  
H9 0.980624 4.480583 -0.050599  
H10 2.606113 2.504261 -1.733742  
H11 3.205007 3.683284 -0.550408  
O12 2.308553 2.033996 0.253297  
H13 1.933416 1.231826 -0.154348  
O14 4.265542 0.108477 0.938256  
C15 4.679231 -0.413698 -0.307075  
C16 4.462031 -1.917833 -0.250606  
N17 3.045164 -2.194342 0.100090  
N18 2.840749 -3.564050 0.483919  
H19 3.812879 0.956465 0.810154  
H20 5.744955 -0.227003 -0.483947  
H21 4.106668 0.017721 -1.134944  
H22 5.075384 -2.350246 0.543914  
H23 4.688294 -2.418722 -1.192482  
H24 2.419121 -2.026654 -0.708009  
H25 2.734332 -1.524561 0.827355  
H26 3.392809 -3.719983 1.324800  
H27 1.856754 -3.619193 0.754888  
O28 -4.638454 -1.426472 0.799225  
C29 -4.844382 -2.028284 -0.471413  
C30 -3.833527 -1.394730 -1.404542  
N31 -2.468082 -1.584253 -0.847822  
N32 -2.060392 -2.964856 -0.890227  
H33 -5.062232 -1.951613 1.483024  
H34 -5.852170 -1.827883 -0.852307  
H35 -4.683368 -3.110329 -0.425086  
H36 -3.981942 -0.315427 -1.473069  
H37 -3.864112 -1.848588 -2.396420  
H38 -2.476488 -1.300027 0.143318  
H39 -1.782353 -0.950067 -1.308488  
H40 -1.500212 -3.074117 -1.732286  
H41 -1.421125 -3.101623 -0.104619  
O42 -2.736197 1.360358 -0.349344  
C43 -3.152452 1.635853 0.970997  
C44 -2.093928 2.381170 1.787698  
N45 -0.743699 1.828439 1.520086

N46 0.240605 2.410186 2.387178  
H47 -2.483053 2.181223 -0.818868  
H48 -3.369004 0.666639 1.427056  
H49 -4.079634 2.222321 0.995416  
H50 -2.301763 2.284004 2.856208  
H51 -2.045415 3.447335 1.554055  
H52 -0.467187 2.120483 0.538367  
H53 -0.774626 0.787057 1.560195  
H54 0.232524 1.887274 3.259032  
H55 1.142479 2.257399 1.930501  
N56 0.692877 -0.564982 -1.685510  
O57 1.751502 0.092902 -1.555687  
O58 0.724444 -1.807003 -1.588110  
O59 -0.387512 0.031870 -1.894642  
N60 0.011010 -1.480445 1.467889  
O61 1.033106 -0.764891 1.552010  
O62 0.086104 -2.702357 1.273669  
O63 -1.123830 -0.932166 1.570515

#### Conformer\_5

O1 2.302988 -0.301285 2.146531  
C2 2.797241 -1.619032 2.013871  
C3 1.901956 -2.473090 1.121979  
N4 1.588674 -1.766088 -0.146318  
N5 0.833740 -2.623340 -1.019860  
H6 1.399268 -0.336365 2.513348  
H7 2.886135 -2.112294 2.988365  
H8 3.794472 -1.511684 1.582825  
H9 0.945820 -2.681495 1.608886  
H10 2.377344 -3.420813 0.860311  
H11 2.485683 -1.523106 -0.636788  
H12 1.066799 -0.902875 0.083322  
H13 0.583942 -2.051303 -1.827937  
H14 -0.045363 -2.816759 -0.533193  
N15 -0.757115 0.194281 -2.152351  
O16 -1.490310 1.182878 -1.905361  
O17 0.479217 0.295455 -2.079961  
O18 -1.289224 -0.906025 -2.438302  
O19 -2.736033 2.388829 0.803373  
C20 -1.975976 3.501012 1.232863  
C21 -0.493056 3.160773 1.299571  
N22 -0.029974 2.622775 -0.004844  
N23 0.024204 3.639051 -1.015640  
H24 -2.701753 1.681467 1.464572  
H25 -2.301646 3.866632 2.213381  
H26 -2.141117 4.289626 0.496511  
H27 -0.293077 2.383389 2.043232  
H28 0.110852 4.037926 1.541715  
H29 -0.714799 1.921617 -0.341386  
H30 0.892030 2.137471 0.104554

H31 -0.190655 3.174601 -1.896161  
H32 0.975604 3.993376 -1.049807  
N33 -1.071100 -0.339445 1.837949  
O34 -0.386380 -0.703824 2.803401  
O35 -0.532437 -0.079717 0.728223  
O36 -2.314834 -0.214288 1.947359  
O37 -1.951388 -2.913782 0.408626  
C38 -2.993238 -3.102063 -0.539247  
C39 -4.035817 -1.992007 -0.486276  
N40 -3.382633 -0.673268 -0.662310  
N41 -4.335546 0.377252 -0.882777  
H42 -2.263825 -3.131845 1.292877  
H43 -3.493486 -4.066249 -0.401116  
H44 -2.507602 -3.111597 -1.518224  
H45 -4.562296 -1.975799 0.472596  
H46 -4.766978 -2.103725 -1.289742  
H47 -2.752203 -0.712055 -1.492840  
H48 -2.783090 -0.482285 0.162165  
H49 -3.777756 1.201979 -1.106777  
H50 -4.785157 0.566508 0.010881  
H51 4.622991 -1.285864 -2.077218  
H52 5.175095 1.703454 -0.229611  
H53 5.818649 -0.476379 -0.162509  
C54 4.638009 0.997871 -0.869647  
H55 5.080827 1.055596 -1.880006  
H56 2.615660 0.678148 -1.563547  
O57 2.548391 1.673343 0.257594  
H58 2.645856 0.926445 0.885144  
C59 3.183764 1.415119 -0.988310  
N60 4.818636 -0.325269 -0.276275  
N61 4.266708 -1.352780 -1.119667  
H62 4.589740 -2.246106 -0.755860  
H63 3.147644 2.354007 -1.547994

#### **Conformer\_6**

O1 -2.073241 -0.076479 2.075881  
C2 -2.399143 1.273962 2.324500  
C3 -1.503929 2.226981 1.537504  
N4 -1.410334 1.809342 0.117258  
N5 -0.702091 2.794869 -0.653067  
H6 -1.160697 -0.262364 2.379552  
H7 -2.313598 1.517005 3.389522  
H8 -3.443909 1.384373 2.026042  
H9 -0.484192 2.231571 1.931486  
H10 -1.889346 3.248888 1.554428  
H11 -2.378981 1.737017 -0.288859  
H12 -0.949769 0.887791 0.077752  
H13 -0.544528 2.373381 -1.569499  
H14 0.221061 2.889548 -0.220656  
N15 0.666547 0.081372 -2.247439

O16 1.382653 -0.948243 -2.163779  
O17 -0.556068 0.006358 -2.011435  
O18 1.192990 1.179026 -2.531050  
O19 2.426537 -2.716847 0.836369  
C20 1.519464 -3.804880 0.919026  
C21 0.082214 -3.308365 0.907131  
N22 -0.185421 -2.527526 -0.330454  
N23 -0.155293 -3.355860 -1.502599  
H24 2.600724 -2.362883 1.715761  
H25 1.684343 -4.405183 1.819298  
H26 1.700932 -4.433391 0.045132  
H27 -0.111946 -2.634278 1.746551  
H28 -0.630512 -4.135326 0.938809  
H29 0.547654 -1.810647 -0.446332  
H30 -1.102787 -2.025981 -0.249072  
H31 0.177588 -2.756263 -2.256779  
H32 -1.111345 -3.637510 -1.700352  
N33 1.322699 -0.095409 1.828623  
O34 0.562590 -0.419712 2.760361  
O35 0.843597 0.097680 0.667834  
O36 2.543175 0.025364 2.005914  
O37 2.126756 2.973249 0.560218  
C38 3.205901 3.112512 -0.353292  
C39 4.086491 1.871677 -0.385464  
N40 3.280158 0.690554 -0.768786  
N41 4.071349 -0.506393 -0.791636  
H42 2.460085 2.981595 1.463436  
H43 3.824367 3.983769 -0.113028  
H44 2.747702 3.283528 -1.331067  
H45 4.517754 1.662415 0.597074  
H46 4.895437 1.970667 -1.111907  
H47 2.867605 0.829826 -1.707178  
H48 2.462547 0.600935 -0.133017  
H49 3.490190 -1.203345 -1.255791  
H50 4.153986 -0.807644 0.177903  
H51 -4.384845 2.631932 -0.022648  
H52 -5.368028 -1.249544 -0.429872  
H53 -3.471510 -1.779881 -1.964019  
H54 -2.746061 -0.956530 0.678875  
H55 -5.746646 0.881545 0.237465  
C56 -4.778368 -0.464847 -0.912088  
H57 -5.263088 -0.221571 -1.874112  
N58 -4.179107 1.831995 -0.616482  
N59 -4.778455 0.677524 -0.000143  
C60 -3.386265 -0.987364 -1.216045  
O61 -2.743328 -1.566436 -0.087904  
H62 -2.762688 -0.200289 -1.651523  
H63 -4.601333 2.033845 -1.527197

**Conformer\_7**

O1 1.786038 -0.910884 2.035642  
 C2 1.663101 -2.276123 2.371697  
 C3 0.370289 -2.900307 1.855426  
 N4 0.150011 -2.548367 0.428609  
 N5 -0.725134 -3.488773 -0.216166  
 H6 1.028552 -0.415450 2.398669  
 H7 1.718058 -2.436218 3.455035  
 H8 2.521017 -2.782790 1.919754  
 H9 -0.500342 -2.553628 2.418844  
 H10 0.415112 -3.989277 1.914720  
 H11 1.060590 -2.530708 -0.095144  
 H12 -0.206014 -1.578047 0.374972  
 H13 -0.643939 -3.292998 -1.212446  
 H14 -1.674918 -3.228116 0.056783  
 N15 -0.105387 -0.121359 -2.396633  
 O16 -0.743527 0.945406 -2.587174  
 O17 1.143316 -0.094781 -2.447874  
 O18 -0.719820 -1.171974 -2.130648  
 O19 -1.168327 3.171400 1.195163  
 C20 0.098862 3.815909 1.209482  
 C21 1.224053 2.806973 1.048145  
 N22 1.080627 2.038003 -0.221565  
 N23 1.083474 2.901957 -1.369514  
 H24 -1.478871 3.030532 2.095054  
 H25 0.258332 4.368657 2.140206  
 H26 0.109944 4.524104 0.379428  
 H27 1.216665 2.065674 1.851294  
 H28 2.204774 3.286038 1.031134  
 H29 0.173695 1.551618 -0.180528  
 H30 1.835921 1.293574 -0.281786  
 H31 0.709985 2.349563 -2.144025  
 H32 2.054551 3.123198 -1.571305  
 N33 -1.358915 0.378042 1.816133  
 O34 -0.598887 0.342336 2.794836  
 O35 -0.882507 0.113100 0.652136  
 O36 -2.552206 0.667316 1.917896  
 O37 -3.250191 -1.962084 0.408221  
 C38 -4.123187 -1.635611 -0.664068  
 C39 -4.309674 -0.132601 -0.809358  
 N40 -3.004840 0.520211 -1.062923  
 N41 -3.110737 1.953316 -1.026856  
 H42 -3.642129 -1.684887 1.243797  
 H43 -5.104903 -2.104204 -0.536427  
 H44 -3.662407 -2.057692 -1.561560  
 H45 -4.707825 0.308523 0.107351  
 H46 -4.980057 0.116276 -1.634217  
 H47 -2.614271 0.263712 -1.978197  
 H48 -2.291485 0.184524 -0.378751  
 H49 -2.350254 2.304733 -1.604905

H50 -2.903103 2.239811 -0.069625  
 H51 4.326465 2.103904 -0.692020  
 H52 4.000980 -0.151899 -2.017312  
 H53 4.285066 -2.550126 -1.511535  
 H54 1.949530 -1.486856 -1.761843  
 H55 3.169289 -0.002103 0.787652  
 C56 4.122277 -0.490619 -0.981379  
 H57 5.200082 -0.477208 -0.756335  
 O58 2.297505 -2.152498 -1.131387  
 C59 3.667539 -1.935445 -0.846217  
 N60 3.404992 0.442467 -0.101725  
 N61 4.137479 1.636522 0.190826  
 H62 5.048254 1.415753 0.596823  
 H63 3.841961 -2.283885 0.178296

**Conformer\_8**

N1 -0.230409 -3.897926 0.270523  
 H2 -0.158447 -4.487299 -0.555379  
 H3 -0.343429 -4.527138 1.068306  
 N4 0.962667 -3.120530 0.372643  
 H5 0.801040 -2.456904 1.131366  
 C6 2.179355 -3.894673 0.610727  
 C7 3.311933 -2.975408 1.057762  
 H8 2.035066 -4.667074 1.385068  
 H9 2.454881 -4.403151 -0.321228  
 H10 3.105146 -2.598245 2.068611  
 H11 4.240329 -3.549954 1.104285  
 O12 3.520376 -1.893102 0.166909  
 H13 2.931635 -1.174780 0.442929  
 O14 3.115167 1.789974 -1.572701  
 C15 3.698078 2.227800 -0.351394  
 C16 2.948115 3.427804 0.207206  
 N17 1.523656 3.087787 0.434455  
 N18 0.764413 4.253050 0.795741  
 H19 3.462906 2.298037 -2.311847  
 H20 4.751982 2.492226 -0.480762  
 H21 3.637646 1.384618 0.338472  
 H22 2.974453 4.263267 -0.498857  
 H23 3.367880 3.763713 1.157475  
 H24 1.422880 2.420170 1.230234  
 H25 1.110497 2.596038 -0.388219  
 H26 0.691793 4.834233 -0.036889  
 H27 -0.172637 3.907321 1.001251  
 O28 -4.628958 -0.490279 -1.110813  
 C29 -5.025490 0.562611 -0.253377  
 C30 -4.550135 0.199918 1.137746  
 N31 -3.069200 0.086852 1.167340  
 N32 -2.614455 -0.349783 2.457638  
 H33 -4.719499 -0.205554 -2.024090

H34 -6.116653 0.670483 -0.222586  
 H35 -4.583780 1.514812 -0.570805  
 H36 -4.943455 -0.766582 1.457010  
 H37 -4.845796 0.964143 1.860770  
 H38 -2.620269 0.975714 0.869035  
 H39 -2.750386 -0.632061 0.478283  
 H40 -1.611894 -0.545239 2.386018  
 H41 -2.723437 0.430382 3.101280  
 O42 -1.595896 -1.625615 -0.407506  
 C43 -1.602447 -1.650186 -1.824376  
 C44 -0.193734 -1.781652 -2.396147  
 N45 0.722937 -0.809963 -1.751997  
 N46 2.055438 -0.921643 -2.280718  
 H47 -1.290728 -2.506710 -0.067951  
 H48 -2.055652 -0.711057 -2.146284  
 H49 -2.215380 -2.474205 -2.207370  
 H50 -0.177589 -1.587870 -3.469898  
 H51 0.240346 -2.764976 -2.208753  
 H52 0.715299 -0.959440 -0.729215  
 H53 0.397984 0.161642 -1.903175  
 H54 2.529757 -0.047394 -2.040998  
 H55 2.517975 -1.657025 -1.740211  
 N56 0.895967 0.177687 1.821600  
 O57 1.598467 0.115718 0.768175  
 O58 0.796609 1.263197 2.416748  
 O59 0.309508 -0.838558 2.232933  
 N60 -1.261562 1.848783 -0.951533  
 O61 -0.129352 1.918054 -1.515084  
 O62 -1.353504 2.167580 0.265351  
 O63 -2.245003 1.451579 -1.573335

**Cartesian coordinates for structures  
 in Figure S7, calculated at  $\omega$ B97XD/  
 6-31+G(d,p)**

**[HOCH<sub>2</sub>CH<sub>2</sub>NHNH<sub>2</sub>CH(OH)CH<sub>3</sub>]<sup>+</sup>**  
 O1 -1.422685 1.331854 -0.721052  
 C2 -1.690981 0.459453 0.301883  
 C3 -2.715911 -0.614000 -0.001142  
 H4 -1.368898 0.862515 -1.562413  
 H5 -1.980829 1.056900 1.171121  
 H6 -3.675232 -0.128614 -0.188213  
 H7 -2.847056 -1.299190 0.841844  
 N8 -0.358050 -0.172317 0.729160  
 H9 0.342154 0.600120 0.834246  
 H10 -0.449428 -0.640782 1.639464  
 N11 0.192171 -1.022249 -0.292635  
 H12 -0.267849 -1.925952 -0.223606  
 C13 1.650985 -1.168571 -0.150273  
 C14 2.371590 0.132207 -0.453161

H15 1.937391 -1.530107 0.847879  
 H16 1.947878 -1.922498 -0.882540  
 H17 3.452215 -0.033311 -0.409095  
 H18 2.095519 0.495056 -1.448840  
 O19 1.970000 1.070596 0.551889  
 H20 2.349570 1.939811 0.388187  
 H21 -2.446910 -1.186128 -0.894246

**TS1**

O1 1.035749 1.437940 0.148097  
 C2 1.602486 0.233285 -0.395230  
 C3 2.477443 -0.478701 0.617946  
 H4 1.700853 1.993212 0.568223  
 H5 2.174308 0.489590 -1.294488  
 H6 3.331484 0.147802 0.890343  
 H7 2.875645 -1.401551 0.186427  
 N8 0.431321 -0.483544 -0.861759  
 H9 -0.609637 1.148546 -0.458137  
 H10 0.589833 -0.956883 -1.746462  
 N11 -0.220225 -1.287822 0.103129  
 H12 0.071440 -2.258964 0.056377  
 C13 -1.663034 -1.149487 0.015717  
 C14 -2.110744 0.176459 0.590265  
 H15 -2.058773 -1.268408 -1.003285  
 H16 -2.120134 -1.921814 0.642568  
 H17 -3.193056 0.296829 0.580748  
 H18 -1.682343 0.351917 1.577887  
 O19 -1.604004 1.269173 -0.304188  
 H20 -1.756742 2.152124 0.069005  
 H21 1.908587 -0.719080 1.517737

**[HOCH<sub>2</sub>CH<sub>2</sub>NHNHCHCH<sub>3</sub>]<sup>+</sup>·H<sub>2</sub>O**

O1 -0.990027 2.093525 -0.205134  
 C2 -1.667922 -0.248996 0.577808  
 C3 -2.480594 -0.613537 -0.593526  
 H4 -1.251622 2.966821 -0.508754  
 H5 -2.077198 0.373392 1.366739  
 H6 -3.110599 0.234917 -0.863141  
 H7 -3.142998 -1.444911 -0.319577  
 N8 -0.467808 -0.672220 0.786424  
 H9 -0.033603 2.112026 -0.045264  
 H10 0.052335 -0.319668 1.590332  
 N11 0.232681 -1.457110 -0.135172  
 H12 0.036934 -2.434725 0.064273  
 C13 1.674519 -1.186943 -0.130306  
 C14 1.992838 0.225651 -0.594365  
 H15 2.128530 -1.363007 0.856778  
 H16 2.105025 -1.905297 -0.832528  
 H17 3.064775 0.305031 -0.792107  
 H18 1.450626 0.448810 -1.518005



O19 1.591162 1.175164 0.401354  
 H20 2.355248 1.645182 0.746290  
 H21 -1.853688 -0.919832 -1.431224

**[HOCH<sub>2</sub>CH<sub>2</sub>NHNHCHCH<sub>3</sub>]<sup>+</sup>**

C1 1.694539 0.010182 -0.496752  
 C2 2.025786 0.719878 0.744145  
 H3 2.248434 0.223584 -1.408979  
 H4 1.828529 1.784424 0.567715  
 H5 3.100932 0.627772 0.930590  
 N6 0.768186 -0.873112 -0.625294  
 H7 0.581877 -1.258636 -1.552621  
 N8 -0.089538 -1.225613 0.426152  
 H9 0.007191 -2.227532 0.569274  
 C10 -1.488228 -0.856284 0.139200  
 C11 -1.738250 0.625022 0.350162  
 H12 -1.785410 -1.146958 -0.878975  
 H13 -2.096624 -1.427107 0.844705  
 H14 -2.803869 0.818653 0.184580  
 H15 -1.486864 0.899417 1.382200  
 O16 -0.934237 1.349625 -0.573221  
 H17 -1.279565 2.241257 -0.672566  
 H18 1.445641 0.366407 1.593307

**Cartesian coordinates for structures  
 in Figure S8, calculated at  $\omega$ B97XD/  
 6-31+G(d,p)**

**[HOCH<sub>2</sub>CH<sub>2</sub>NH(NH<sub>2</sub>)CH(OH)CH<sub>3</sub>]<sup>+</sup>**

C1 -0.728874 1.864990 -0.349062  
 C2 -1.259064 0.447011 -0.396829  
 H3 -1.733282 0.243853 -1.366530  
 O4 -2.097183 0.113036 0.664593  
 H5 -2.914314 0.621375 0.638915  
 H6 -0.375996 2.118807 0.652095  
 H7 0.069114 2.020175 -1.080753  
 H8 -1.543912 2.547645 -0.601398  
 N9 -0.648156 -1.939006 -0.437483  
 N10 -0.160672 -0.595144 -0.298204  
 C11 0.703818 -0.516177 0.941686  
 C12 1.939046 0.344645 0.663055  
 H13 1.746470 1.409166 0.826279  
 H14 2.729819 0.025528 1.348666  
 O15 2.278728 0.095674 -0.690262  
 H16 3.134680 0.469210 -0.919499  
 H17 0.995028 -1.548515 1.129723  
 H18 0.099414 -0.145329 1.769674  
 H19 0.513634 -0.444514 -1.067404  
 H20 -1.042171 -2.039733 -1.370425  
 H21 -1.398610 -2.051121 0.242713

**TS1**

C1 -2.396805 0.247430 1.015717  
 C2 -1.077500 0.562475 0.382537  
 H3 -0.405765 1.127725 1.030172  
 O4 -1.273769 1.368807 -0.888438  
 H5 -0.953612 2.286491 -0.878612  
 H6 -3.090513 -0.210876 0.309590  
 H7 -2.233324 -0.433768 1.856535  
 H8 -2.845563 1.161185 1.409520  
 N9 -0.988801 -1.738572 -0.563293  
 N10 -0.338916 -0.508159 -0.324274  
 C11 1.041850 -0.732744 0.175517  
 C12 1.990976 0.388676 -0.237555  
 H13 2.161119 0.338027 -1.321976  
 H14 1.559379 1.380921 -0.010427  
 O15 3.162198 0.175831 0.499709  
 H16 3.895410 0.677409 0.132026  
 H17 1.372776 -1.675595 -0.256755  
 H18 1.041078 -0.834542 1.267283  
 H19 -0.606688 0.564909 -1.299609  
 H20 -1.745942 -1.629953 -1.226956  
 H21 -1.312900 -2.176937 0.294717

**[HOCH<sub>2</sub>CH<sub>2</sub>N(NH<sub>2</sub>)CHCH<sub>3</sub>]<sup>+</sup>·H<sub>2</sub>O**

C1 2.744110 0.208195 0.191081  
 C2 1.356223 0.135052 0.702247  
 H3 1.094685 -0.505295 1.534840  
 O4 0.839375 -2.392876 -0.332959  
 H5 0.723387 -3.212294 0.158908  
 H6 2.763937 0.044762 -0.891819  
 H7 3.189095 1.189691 0.401411  
 H8 3.358289 -0.551084 0.671594  
 N9 0.546082 1.597009 -0.931603  
 N10 0.384057 0.813710 0.200535  
 C11 -1.011915 0.655053 0.643140  
 C12 -1.840324 -0.132667 -0.374650  
 H13 -1.891526 0.404656 -1.330446  
 H14 -1.364439 -1.107234 -0.542317  
 O15 -3.100502 -0.241045 0.237331  
 H16 -3.715833 -0.701013 -0.340667  
 H17 -1.436015 1.649709 0.807230  
 H18 -1.002397 0.126641 1.596395  
 H19 1.063973 -2.667695 -1.227618  
 H20 1.471371 2.011307 -0.970642  
 H21 -0.165054 2.320381 -0.955282

**[HOCH<sub>2</sub>CH<sub>2</sub>N(NH<sub>2</sub>)CHCH<sub>3</sub>]<sup>+</sup>**

C1 -2.845633 -0.523973 0.314016  
 C2 -1.462502 -0.775374 -0.155328  
 H3 -1.121564 -1.774603 -0.404526

H4 -2.839486 -0.011119 1.283438  
 H5 -3.397845 0.100815 -0.400549  
 H6 -3.383777 -1.464628 0.419180  
 N7 -0.825258 1.458604 0.088992  
 N8 -0.578778 0.154556 -0.283947  
 C9 0.822473 -0.119798 -0.658702  
 C10 1.759381 -0.025752 0.549430  
 H11 1.728437 0.980738 0.985452  
 H12 1.437911 -0.745365 1.315598  
 O13 3.016348 -0.339131 0.015393  
 H14 3.698105 -0.274825 0.690756  
 H15 1.114850 0.595864 -1.431610  
 H16 0.866082 -1.120646 -1.088608  
 H17 -1.805878 1.705719 0.015218  
 H18 -0.241679 2.098357 -0.439303

**Cartesian coordinates for structures  
 in Figure S9, calculated at  $\omega$ B97XD/  
 6-31+G(d,p)**

**[HE][HOCH<sub>2</sub>CH<sub>2</sub>NHNH<sub>2</sub>CH(OH)CH<sub>3</sub>]<sup>+</sup>**

**Conformer\_1**

O1 1.964084 2.240880 0.017149  
 C2 0.673328 1.766516 0.131338  
 C3 -0.269649 2.209231 -0.969251  
 H4 2.272449 2.090468 -0.885403  
 H5 0.306043 2.075926 1.113764  
 H6 -0.238453 3.298710 -1.029348  
 H7 -1.300206 1.911523 -0.751568  
 N8 0.733119 0.249605 0.205794  
 H9 1.322715 0.005193 1.024261  
 H10 -0.240668 -0.165001 0.286021  
 N11 1.389170 -0.295533 -0.965151  
 H12 0.644185 -0.700643 -1.534428  
 C13 2.323025 -1.376805 -0.615951  
 C14 3.447497 -0.913310 0.290370  
 H15 1.815558 -2.230340 -0.142713  
 H16 2.741519 -1.719497 -1.565083  
 H17 4.209560 -1.696429 0.352676  
 H18 3.899815 0.003866 -0.102573  
 O19 2.872537 -0.679374 1.580787  
 H20 3.516182 -0.270283 2.167306  
 H21 0.037251 1.804202 -1.938643  
 H22 -2.011696 -0.234705 -1.005019  
 N23 -1.742229 -0.935312 -0.316748  
 N24 -1.211066 -2.036460 -1.059517  
 H25 -0.845027 -2.714166 -0.396614  
 H26 -1.943679 -2.508112 -1.591573  
 C27 -3.427034 0.061123 1.118780  
 H28 -4.391366 -0.116013 1.606088

H29 -2.710890 0.402793 1.879109  
 C30 -2.940264 -1.229502 0.481843  
 H31 -2.681684 -1.955193 1.259056  
 H32 -3.731531 -1.659872 -0.148419  
 O33 -3.532999 1.021455 0.076549  
 H34 -4.123420 1.734263 0.333806

**Conformer\_2**

O1 -2.410073 -1.954199 -0.123182  
 C2 -1.280347 -1.765561 0.640985  
 C3 -0.083911 -2.603236 0.235671  
 H4 -2.176342 -1.856450 -1.055553  
 H5 -1.561017 -1.954967 1.680539  
 H6 -0.371936 -3.655166 0.272576  
 H7 0.745084 -2.456644 0.934748  
 N8 -0.932969 -0.283245 0.600486  
 H9 -1.773873 0.238017 0.920013  
 N10 -0.688532 0.143715 -0.758676  
 H11 0.333193 0.080044 -0.895929  
 C12 -1.141795 1.520007 -0.985080  
 C13 -2.647510 1.666444 -0.866611  
 H14 -0.661394 2.242322 -0.307080  
 H15 -0.838345 1.763804 -2.006097  
 H16 -2.944001 2.670198 -1.187851  
 H17 -3.149914 0.920448 -1.492226  
 O18 -2.976677 1.471407 0.512971  
 H19 -3.930590 1.442295 0.634186  
 H20 0.246680 -2.370702 -0.781332  
 H21 2.151772 -1.000974 -0.068317  
 N22 2.277916 -0.188792 -0.663739  
 N23 2.870343 -0.675189 -1.859700  
 H24 2.710014 -0.005525 -2.603377  
 H25 3.874952 -0.812541 -1.758194  
 C26 2.176416 1.416985 1.162631  
 H27 2.759222 2.060897 1.826235  
 H28 1.394315 2.027884 0.701527  
 C29 3.056194 0.804197 0.083682  
 H30 3.365355 1.596058 -0.606104  
 H31 3.966861 0.366978 0.520948  
 O32 1.502776 0.392938 1.911557  
 H33 1.899192 0.281823 2.779651  
 H34 -0.129025 -0.067401 1.224598

**Conformer\_3**

O1 2.067063 -1.612891 -1.427631  
 C2 0.818984 -1.646201 -0.838678  
 C3 0.547146 -2.863341 0.026646  
 H4 2.743539 -1.809976 -0.768543  
 H5 0.083490 -1.557751 -1.642458  
 H6 0.543420 -3.750568 -0.608320

H7 -0.423426 -2.790306 0.528699  
 N8 0.619272 -0.379235 -0.040698  
 H9 0.871051 0.418127 -0.648431  
 N10 1.504179 -0.310612 1.094822  
 H11 1.083529 -0.886350 1.820241  
 C12 1.638092 1.071150 1.576579  
 C13 2.460392 1.922980 0.628445  
 H14 0.661712 1.550140 1.746355  
 H15 2.156269 1.009182 2.536468  
 H16 2.641121 2.901499 1.086009  
 H17 3.419063 1.432775 0.426591  
 O18 1.704630 2.069431 -0.577159  
 H19 2.230763 2.512794 -1.249317  
 H20 1.326549 -2.996599 0.783603  
 H21 -2.266519 -1.061440 -0.177957  
 N22 -2.098961 -0.359069 0.538785  
 N23 -2.485043 -0.956314 1.772263  
 H24 -2.151578 -0.372366 2.531872  
 H25 -3.499461 -1.020607 1.852220  
 C26 -2.057178 1.546185 -0.982551  
 H27 -2.692605 2.302069 -1.453987  
 H28 -1.164503 2.048078 -0.584345  
 C29 -2.823057 0.861569 0.142887  
 H30 -2.869355 1.531909 1.006563  
 H31 -3.851438 0.628963 -0.163989  
 O32 -1.659059 0.540439 -1.912260  
 H33 -1.614314 0.905668 -2.799420  
 H34 -0.410774 -0.288519 0.238369

#### Conformer\_4

O1 3.311341 1.017812 -0.545593  
 C2 2.186120 1.537787 0.058530  
 C3 1.428259 2.548775 -0.779483  
 H4 3.085559 0.724637 -1.437435  
 H5 2.506559 1.970201 1.010269  
 H6 2.093548 3.385586 -0.997795  
 H7 0.555505 2.934653 -0.246383  
 N8 1.282383 0.383013 0.448118  
 H9 1.859941 -0.294888 0.983422  
 N10 0.821135 -0.322470 -0.729416  
 H11 -0.091703 0.086275 -0.940443  
 C12 0.642390 -1.757480 -0.464749  
 C13 1.956743 -2.459936 -0.184286  
 H14 -0.051044 -1.950757 0.367459  
 H15 0.195111 -2.171494 -1.371185  
 H16 1.790482 -3.541145 -0.143122  
 H17 2.682640 -2.232960 -0.973012  
 O18 2.421870 -1.981501 1.081915  
 H19 3.304285 -2.315629 1.269414  
 H20 1.100416 2.110599 -1.726108

H21 -1.792509 -0.422544 0.621027  
 N22 -1.871838 0.565799 0.388182  
 N23 -1.237048 1.286135 1.450728  
 H24 -1.279939 2.275064 1.216867  
 H25 -1.739982 1.178235 2.335114  
 C26 -3.846193 -0.171174 -0.782377  
 H27 -4.926504 -0.042898 -0.896394  
 H28 -3.378844 -0.004232 -1.757780  
 C29 -3.302382 0.833861 0.225395  
 H30 -3.440321 1.853032 -0.151322  
 H31 -3.839347 0.741659 1.183616  
 O32 -3.505656 -1.490634 -0.373201  
 H33 -4.276944 -1.944288 -0.025382  
 H34 0.470593 0.717141 1.032731

#### Conformer\_5

O1 1.706285 -1.528575 0.908616  
 C2 2.010088 -1.469870 -0.412399  
 C3 1.128480 -2.278376 -1.345795  
 H4 0.724845 -1.632925 1.085558  
 H5 3.066764 -1.729444 -0.544584  
 H6 1.245973 -3.334539 -1.097346  
 H7 1.419726 -2.146606 -2.392562  
 N8 1.984223 0.023813 -0.832091  
 H9 2.438428 0.551394 -0.049326  
 H10 2.528785 0.180351 -1.688053  
 N11 0.655480 0.556467 -0.909628  
 H12 0.278975 0.379158 -1.836162  
 C13 0.590650 1.984596 -0.567320  
 C14 0.935590 2.211114 0.892284  
 H15 1.237764 2.600589 -1.207995  
 H16 -0.450931 2.264197 -0.742503  
 H17 0.769542 3.262224 1.147569  
 H18 0.309380 1.571073 1.523776  
 O19 2.322581 1.878721 1.047140  
 H20 2.561787 1.838884 1.978311  
 H21 0.074774 -2.011681 -1.230003  
 H22 -0.937019 -0.185314 0.191024  
 N23 -1.533486 -0.490484 0.955312  
 N24 -0.969726 -1.709965 1.432435  
 H25 -1.155513 -1.787117 2.428555  
 H26 -1.397706 -2.523420 0.983716  
 C27 -3.315453 0.664918 -0.225027  
 H28 -4.350564 0.566532 -0.567224  
 H29 -3.250172 1.513619 0.466763  
 C30 -2.905410 -0.611871 0.481851  
 H31 -3.574222 -0.776503 1.333854  
 H32 -3.027898 -1.459162 -0.216139  
 O33 -2.434788 0.873084 -1.335576  
 H34 -2.884447 1.410964 -1.992427

**Cartesian coordinates for structures  
in Figure S10, calculated at  $\omega$ B97XD/  
6-31+G(d,p)**

**[HE][HOCH<sub>2</sub>CH<sub>2</sub>NHNH<sub>2</sub>CH(OH)CH<sub>3</sub>]<sup>+</sup>  
Conformer\_1**

O1 1.964084 2.240880 0.017149  
C2 0.673328 1.766516 0.131338  
C3 -0.269649 2.209231 -0.969251  
H4 2.272449 2.090468 -0.885403  
H5 0.306043 2.075926 1.113764  
H6 -0.238453 3.298710 -1.029348  
H7 -1.300206 1.911523 -0.751568  
N8 0.733119 0.249605 0.205794  
H9 1.322715 0.005193 1.024261  
H10 -0.240668 -0.165001 0.286021  
N11 1.389170 -0.295533 -0.965151  
H12 0.644185 -0.700643 -1.534428  
C13 2.323025 -1.376805 -0.615951  
C14 3.447497 -0.913310 0.290370  
H15 1.815558 -2.230340 -0.142713  
H16 2.741519 -1.719497 -1.565083  
H17 4.209560 -1.696429 0.352676  
H18 3.899815 0.003866 -0.102573  
O19 2.872537 -0.679374 1.580787  
H20 3.516182 -0.270283 2.167306  
H21 0.037251 1.804202 -1.938643  
H22 -2.011696 -0.234705 -1.005019  
N23 -1.742229 -0.935312 -0.316748  
N24 -1.211066 -2.036460 -1.059517  
H25 -0.845027 -2.714166 -0.396614  
H26 -1.943679 -2.508112 -1.591573  
C27 -3.427034 0.061123 1.118780  
H28 -4.391366 -0.116013 1.606088  
H29 -2.710890 0.402793 1.879109  
C30 -2.940264 -1.229502 0.481843  
H31 -2.681684 -1.955193 1.259056  
H32 -3.731531 -1.659872 -0.148419  
O33 -3.532999 1.021455 0.076549  
H34 -4.123420 1.734263 0.333806

**TS1**

O1 2.093326 2.051431 0.155778  
C2 0.734825 1.581690 0.093894  
C3 0.068791 1.960610 -1.215356  
H4 2.355833 2.432525 -0.688130  
H5 0.208099 2.042025 0.935416  
H6 0.137753 3.040525 -1.375590  
H7 -0.995651 1.712219 -1.173438  
N8 0.816154 0.168060 0.418442

H9 2.661964 0.544884 0.901372  
H10 -0.071805 -0.162385 0.807060  
N11 1.206955 -0.661867 -0.680619  
H12 0.383886 -1.138116 -1.057798  
C13 2.149849 -1.668848 -0.222693  
C14 3.529912 -1.080187 -0.036403  
H15 1.833603 -2.172531 0.702386  
H16 2.245318 -2.430899 -1.003207  
H17 4.263924 -1.810222 0.301883  
H18 3.862872 -0.547850 -0.928712  
O19 3.454083 -0.074966 1.070686  
H20 4.259685 0.460244 1.145063  
H21 0.530388 1.436310 -2.056405  
H22 -1.895609 -0.232835 -0.742918  
N23 -1.955844 -0.958369 -0.033972  
N24 -1.493482 -2.158183 -0.652841  
H25 -1.336700 -2.846319 0.077275  
H26 -2.194922 -2.546503 -1.286490  
C27 -3.740254 0.389988 0.905472  
H28 -4.804981 0.392483 1.164360  
H29 -3.158992 0.657255 1.798143  
C30 -3.345437 -0.993865 0.422873  
H31 -3.433857 -1.708881 1.247384  
H32 -4.026566 -1.311085 -0.383140  
O33 -3.463192 1.297128 -0.155809  
H34 -3.900588 2.136599 0.006457

**[HE][HOCH<sub>2</sub>CH<sub>2</sub>NHNHCHCH<sub>3</sub>]<sup>+</sup>·H<sub>2</sub>O**

O1 -2.802667 2.427519 -0.301599  
C2 -0.495420 1.178405 -0.519235  
C3 0.139384 1.705103 0.696383  
H4 -3.338506 3.217313 -0.194379  
H5 -0.561876 1.793594 -1.410173  
H6 -0.207830 2.730330 0.841222  
H7 1.229440 1.735380 0.551676  
N8 -0.992214 -0.003168 -0.640350  
H9 -3.407681 1.669644 -0.340134  
H10 -1.468848 -0.248577 -1.507863  
N11 -0.986997 -0.949636 0.386072  
H12 -0.131542 -1.523871 0.271353  
C13 -2.189824 -1.779983 0.376463  
C14 -3.451214 -0.987397 0.685243  
H15 -2.322980 -2.315487 -0.577956  
H16 -2.030301 -2.529185 1.156377  
H17 -4.260525 -1.674359 0.946814  
H18 -3.273841 -0.319724 1.533367  
O19 -3.823236 -0.178733 -0.438174  
H20 -4.638546 -0.502487 -0.829518  
H21 -0.091733 1.090530 1.566293  
H22 1.936828 -0.403701 0.698609

N23 2.166032 -0.834493 -0.192679  
 N24 1.634998 -2.157417 -0.145794  
 H25 1.655618 -2.536117 -1.088140  
 H26 2.201331 -2.775234 0.439744  
 C27 4.039790 0.694336 -0.372249  
 H28 5.132707 0.756728 -0.404420  
 H29 3.631552 1.190460 -1.262124  
 C30 3.617322 -0.763680 -0.357279  
 H31 3.887458 -1.225292 -1.312844  
 H32 4.147864 -1.299233 0.446952  
 O33 3.520831 1.303902 0.806681  
 H34 4.039019 2.080082 1.033167

**[HE][HOCH<sub>2</sub>CH<sub>2</sub>NHNHCHCH<sub>3</sub>]<sup>+</sup>**

C1 -1.037594 1.641605 0.422406  
 C2 -2.352293 2.185302 0.806221  
 H3 -0.283844 2.298758 -0.007924  
 H4 -2.913886 2.366632 -0.117362  
 H5 -2.218315 3.147761 1.306133  
 N6 -0.666856 0.421814 0.541543  
 H7 0.324351 0.112314 0.278879  
 N8 -1.517044 -0.568743 1.072469  
 H9 -0.914631 -1.112111 1.690262  
 C10 -2.032529 -1.467958 0.023264  
 C11 -3.181072 -0.876925 -0.770740  
 H12 -1.241121 -1.785422 -0.671316  
 H13 -2.396136 -2.351354 0.554595  
 H14 -3.617910 -1.675699 -1.381465  
 H15 -3.950502 -0.503495 -0.082518  
 O16 -2.681138 0.171100 -1.591281  
 H17 -3.315218 0.362781 -2.287524  
 H18 -2.907323 1.487565 1.431885  
 H19 2.227265 -0.082031 1.156610  
 N20 1.842406 -0.640986 0.396164  
 N21 1.410371 -1.876370 0.978942  
 H22 1.020824 -2.448248 0.233924  
 H23 2.202769 -2.393903 1.361232  
 C24 3.316058 0.622661 -1.071258  
 H25 4.163545 0.535727 -1.760048  
 H26 2.490837 1.122434 -1.598651  
 C27 2.887991 -0.765523 -0.629563  
 H28 2.482636 -1.318723 -1.482647  
 H29 3.753669 -1.315390 -0.234574  
 O30 3.660538 1.335002 0.105674  
 H31 4.172290 2.118616 -0.110451

**[HOCH<sub>2</sub>CH<sub>2</sub>NHNHCHCH<sub>3</sub>]<sup>+</sup>·H<sub>2</sub>O**

O1 -0.990027 2.093525 -0.205134  
 C2 -1.667922 -0.248996 0.577808  
 C3 -2.480594 -0.613537 -0.593526

H4 -1.251622 2.966821 -0.508754  
 H5 -2.077198 0.373392 1.366739  
 H6 -3.110599 0.234917 -0.863141  
 H7 -3.142998 -1.444911 -0.319577  
 N8 -0.467808 -0.672220 0.786424  
 H9 -0.033603 2.112026 -0.045264  
 H10 0.052335 -0.319668 1.590332  
 N11 0.232681 -1.457110 -0.135172  
 H12 0.036934 -2.434725 0.064273  
 C13 1.674519 -1.186943 -0.130306  
 C14 1.992838 0.225651 -0.594365  
 H15 2.128530 -1.363007 0.856778  
 H16 2.105025 -1.905297 -0.832528  
 H17 3.064775 0.305031 -0.792107  
 H18 1.450626 0.448810 -1.518005  
 O19 1.591162 1.175164 0.401354  
 H20 2.355248 1.645182 0.746290  
 H21 -1.853688 -0.919832 -1.431224

**OHCH<sub>2</sub>CH<sub>2</sub>NHNH<sub>2</sub> (HE)**

N1 2.217126 -0.278438 -0.058113  
 H2 2.555479 0.648037 -0.315617  
 H3 2.270478 -0.880530 -0.871609  
 N4 0.873455 -0.241323 0.388914  
 H5 0.897688 -0.097285 1.393128  
 C6 0.020034 0.754971 -0.252602  
 C7 -1.423443 0.497918 0.161670  
 H8 0.309301 1.793594 -0.013848  
 H9 0.111177 0.617122 -1.335656  
 H10 -1.532872 0.659155 1.247005  
 H11 -2.091380 1.199932 -0.344256  
 O12 -1.830542 -0.804154 -0.193706  
 H13 -1.089154 -1.385805 0.020488

**[HE + H]<sup>+</sup>**

O1 1.353141 -0.806526 -0.426858  
 C2 1.223684 0.234158 0.526470  
 C3 0.084362 1.102238 0.008007  
 N4 -0.990024 0.202679 -0.535109  
 N5 -1.626194 -0.558328 0.504662  
 H6 2.172580 -1.296881 -0.310192  
 H7 2.124798 0.850458 0.599256  
 H8 0.995926 -0.164393 1.522043  
 H9 0.409620 1.716766 -0.834684  
 H10 -0.363482 1.720944 0.785656  
 H11 -0.542720 -0.392386 -1.248824  
 H12 -1.706814 0.777787 -0.982576  
 H13 -2.465640 -0.986219 0.120515  
 H14 -0.984150 -1.302694 0.769940

**HOCH<sub>2</sub>CH<sub>2</sub>NHNC<sub>2</sub>H<sub>5</sub>**

C1 -1.853222 0.598223 -0.477424  
C2 -2.500830 -0.702877 -0.104237  
H3 -2.362266 1.225927 -1.208253  
H4 -2.197834 -1.514969 -0.776056  
H5 -3.587164 -0.608608 -0.181500  
N6 -0.785110 1.113795 -0.001905  
N7 -0.087323 0.361681 0.963072  
H8 0.620657 0.994410 1.320583  
C9 0.616982 -0.816384 0.453651  
C10 1.642949 -0.511155 -0.630192  
H11 1.129314 -1.265490 1.310843  
H12 -0.096469 -1.555500 0.080420  
H13 2.089291 -1.451138 -0.985087  
H14 1.151156 -0.015418 -1.476681  
O15 2.632718 0.328550 -0.054497  
H16 3.093714 0.807237 -0.746348  
H17 -2.230384 -0.980021 0.919102
